# Supplementary material
Source: MDPI journal article supplement (https://www.mdpi.com/2674-1334/1/3/12)
Supplement: s1 [file s1]

Supplementary Materials

# Genomic Characterization of *Lactiplantibacillus plantarum* Strains Possessing Differential Antiviral Immunomodulatory Activities

Leonardo Albarracin <sup>1,2</sup>, Fernanda Raya Tonetti <sup>1</sup>, Kohtaro Fukuyama <sup>2,3</sup>, Yoshihito Suda <sup>4</sup>, Binghui Zhou <sup>2</sup>, Ayelén A. Baillo <sup>5</sup>, Silvina Fadda <sup>5</sup>, Lucila Saavedra <sup>5</sup>, Shoichiro Kurata <sup>6</sup>, Elvira M. Hebert <sup>5,\*</sup>, Haruki Kitazawa <sup>2,3,\*</sup> and Julio Villena <sup>1,2,\*</sup>

- <sup>1</sup> Laboratory of Immunobiotechnology, Reference Centre for Lactobacilli (CERELA-CONICET), San Miguel de Tucuman 4000, Argentina; lalbarracin@herrera.unt.edu.ar (L.A.); frayatonetti@gmail.com (F.R.T.)
  - <sup>2</sup> Food and Feed Immunology Group, Laboratory of Animal Food Function, Graduate School of Agricultural Science, Tohoku University, Sendai 980-857, Japan; kotaro.fukuyama.p8@dc.tohoku.ac.jp (K.F.); zhou.binghui.s5@dc.tohoku.ac.jp (B.Z.)
  - <sup>3</sup> Livestock Immunology Unit, International Education and Research Center for Food Agricultural Immunology (CFAI), Graduate School of Agricultural Science, Tohoku University, Sendai 980-8572, Japan
  - <sup>4</sup> Department of Food, Agriculture and Environment, Miyagi University, Sendai 980-8572, Japan; suda@myu.ac.jp
  - <sup>5</sup> Laboratory of Technology, Reference Centre for Lactobacilli (CERELA-CONICET), San Miguel de Tucuman 4000, Argentina; abaillo@cerela.org.ar (A.A.B.); sfadda@cerela.org.ar (S.F.); lucila@cerela.org.ar (L.S.)
  - <sup>6</sup> Laboratory of Molecular Genetics, Graduate School of Pharmaceutical Sciences, Tohoku University, Sendai 980-8578, Japan; shoichiro.kurata.d5@tohoku.ac.jp
- \* Correspondence: ehebert@cerela.org.ar (E.M.H.); haruki.kitazawa.c7@tohoku.ac.jp (H.K.); jcvillena@cerela.org.ar (J.V.)

**Citation:** Albarracin, L.; Raya Tonetti, F.; Fukuyama, K.; Suda, Y.; Zhou, B.; Baillo, A.A.; Fadda, S.; Saavedra, L.; Kurata, S.; Hebert, E.M.; et al. Genomic Characterization of *Lactiplantibacillus plantarum* Strains Possessing Differential Antiviral Immunomodulatory Activities. *Bacteria* **2022**, *1*, 12. <https://doi.org/10.3390/bacteria1030012>

Academic Editor: Bart C. Weimer

Received: 16 May 2022

Accepted: 4 July 2022

Published: 6 July 2022

**Publisher's Note:** MDPI stays neutral with regard to jurisdictional claims in published maps and institutional affiliations.

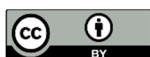

**Copyright:** © 2022 by the authors. Licensee MDPI, Basel, Switzerland. This article is an open access article distributed under the terms and conditions of the Creative Commons Attribution (CC BY) license (<https://creativecommons.org/licenses/by/4.0/>).

**Table S1.** Orthologous genes obtained by OrthoFinder analysis, with their corresponding PGAP annotation.

| Orthologous Group | CRL1506 orthologous                            | CRL681 orthologous                          | MPL16 orthologous                        | TL2766 orthologous                          | WCFS1 orthologous                        |
|-------------------|------------------------------------------------|---------------------------------------------|------------------------------------------|---------------------------------------------|------------------------------------------|
| OG0001387         | CRL1506_002282                                 | CRL681_002874                               | MPL16_000500                             | TL2766_000203                               | WCFS1_000001                             |
| OG0001388         | CRL1506_002283                                 | CRL681_002873                               | MPL16_000499                             | TL2766_000202                               | WCFS1_000002                             |
| OG0001389         | CRL1506_002284                                 | CRL681_002872                               | MPL16_000498                             | TL2766_000201                               | WCFS1_000003                             |
| OG0001390         | CRL1506_002285                                 | CRL681_002871                               | MPL16_000497                             | TL2766_000200                               | WCFS1_000004                             |
| OG0001391         | CRL1506_002286                                 | CRL681_002870                               | MPL16_000496                             | TL2766_000199                               | WCFS1_000005                             |
| OG0001392         | CRL1506_002287                                 | CRL681_002869                               | MPL16_000495                             | TL2766_000198                               | WCFS1_000006                             |
| OG0001393         | CRL1506_002288                                 | CRL681_002868                               | MPL16_000494                             | TL2766_000197                               | WCFS1_000007                             |
| OG0001394         | CRL1506_002289                                 | CRL681_002867                               | MPL16_000493                             | TL2766_000196                               | WCFS1_000008                             |
| OG0001395         | CRL1506_002290                                 | CRL681_002866                               | MPL16_000492                             | TL2766_000195                               | WCFS1_000009                             |
| OG0001396         | CRL1506_002291                                 | CRL681_002865                               | MPL16_000491                             | TL2766_000194                               | WCFS1_000010                             |
| OG0001397         | CRL1506_002292                                 | CRL681_002864                               | MPL16_000490                             | TL2766_000193                               | WCFS1_000011                             |
| OG0001398         | CRL1506_002293                                 | CRL681_002863                               | MPL16_000489                             | TL2766_000192                               | WCFS1_000012                             |
| OG0001399         | CRL1506_002294                                 | CRL681_002862                               | MPL16_000488                             | TL2766_000191                               | WCFS1_000013                             |
| OG0001400         | CRL1506_002295                                 | CRL681_002861                               | MPL16_000487                             | TL2766_000190                               | WCFS1_000014                             |
| OG0001401         | CRL1506_002296                                 | CRL681_002860                               | MPL16_000486                             | TL2766_000189                               | WCFS1_000015                             |
| OG0002477         | CRL1506_002297                                 | CRL681_002859                               |                                          | TL2766_000188                               | WCFS1_000016                             |
| OG0001402         | CRL1506_002298                                 | CRL681_002858                               | MPL16_002059                             | TL2766_000187                               | WCFS1_000017                             |
| OG0001403         | CRL1506_002299                                 | CRL681_002857                               | MPL16_002060                             | TL2766_000186                               | WCFS1_000018                             |
| OG0001404         | CRL1506_002300                                 | CRL681_002856                               | MPL16_002061                             | TL2766_000185                               | WCFS1_000019                             |
| OG0001405         | CRL1506_002301                                 | CRL681_002855                               | MPL16_002062                             | TL2766_000184                               | WCFS1_000020                             |
| OG0001406         | CRL1506_002302                                 | CRL681_002854                               | MPL16_002063                             | TL2766_000183                               | WCFS1_000021                             |
| OG0001407         | CRL1506_002303                                 | CRL681_002853                               | MPL16_002064                             | TL2766_000182                               | WCFS1_000022                             |
| OG0001408         | CRL1506_002304                                 | CRL681_002852                               | MPL16_002065                             | TL2766_000181                               | WCFS1_000023                             |
| OG0000034         | CRL1506_002305, CRL1506_002333                 | CRL681_002819, CRL681_002851                | MPL16_000349, MPL16_002066               | TL2766_000152, TL2766_000180                | WCFS1_000024, WCFS1_000053               |
| OG0001409         | CRL1506_002306                                 | CRL681_002850                               | MPL16_000535                             | TL2766_000179                               | WCFS1_000025                             |
| OG0001410         | CRL1506_002307                                 | CRL681_002849                               | MPL16_000534                             | TL2766_000178                               | WCFS1_000026                             |
| OG0000007         | CRL1506_000636, CRL1506_001165, CRL1506_002308 | CRL681_001743, CRL681_001883, CRL681_002848 | MPL16_000533, MPL16_001461, MPL16_001951 | TL2766_000177, TL2766_000599, TL2766_000735 | WCFS1_000027, WCFS1_000859, WCFS1_000994 |

|           |                                |                              |              |                              |                            |
|-----------|--------------------------------|------------------------------|--------------|------------------------------|----------------------------|
| OG0001411 | CRL1506_002309                 | CRL681_002847                | MPL16_000532 | TL2766_000176                | WCFS1_000028               |
| OG0001412 | CRL1506_002311                 | CRL681_002845                | MPL16_000530 | TL2766_000174                | WCFS1_000030               |
| OG0000182 | CRL1506_002312                 | CRL681_000581, CRL681_002844 | MPL16_000529 | TL2766_000173                | WCFS1_000031               |
| OG0001413 | CRL1506_002313                 | CRL681_002843                | MPL16_000528 | TL2766_000172                | WCFS1_000032               |
| OG0001414 | CRL1506_002314                 | CRL681_002842                | MPL16_000527 | TL2766_000171                | WCFS1_000033               |
| OG0001415 | CRL1506_002315                 | CRL681_002841                | MPL16_000526 | TL2766_000170                | WCFS1_000034               |
| OG0000183 | CRL1506_002316                 | CRL681_002840                | MPL16_000525 | TL2766_000169, TL2766_002764 | WCFS1_000035               |
| OG0001416 | CRL1506_002317                 | CRL681_002839                | MPL16_000524 | TL2766_000168                | WCFS1_000036               |
| OG0002838 | CRL1506_002318                 |                              |              |                              | WCFS1_000037               |
| OG0002839 | CRL1506_002319                 |                              |              |                              | WCFS1_000038               |
| OG0002478 | CRL1506_002320                 | CRL681_002832                |              | TL2766_000165                | WCFS1_000039               |
| OG0002479 | CRL1506_002321                 | CRL681_002831                |              | TL2766_000164                | WCFS1_000040               |
| OG0002480 | CRL1506_002322                 | CRL681_002830                |              | TL2766_000163                | WCFS1_000041               |
| OG0002481 | CRL1506_002323                 | CRL681_002829                |              | TL2766_000162                | WCFS1_000042               |
| OG0000170 | CRL1506_002101                 | CRL681_000115                | MPL16_002785 | TL2766_000454                | WCFS1_000043, WCFS1_002021 |
| OG0002482 | CRL1506_002324                 | CRL681_002828                |              | TL2766_000161                | WCFS1_000044               |
| OG0002483 | CRL1506_002325                 | CRL681_002827                |              | TL2766_000160                | WCFS1_000045               |
| OG0001417 | CRL1506_002326                 | CRL681_002826                | MPL16_000482 | TL2766_000159                | WCFS1_000046               |
| OG0001418 | CRL1506_002327                 | CRL681_002825                | MPL16_000481 | TL2766_000158                | WCFS1_000047               |
| OG0001419 | CRL1506_002328                 | CRL681_002824                | MPL16_000480 | TL2766_000157                | WCFS1_000048               |
| OG0001420 | CRL1506_002329                 | CRL681_002823                | MPL16_002386 | TL2766_000156                | WCFS1_000049               |
| OG0002484 | CRL1506_002330                 | CRL681_002822                |              | TL2766_000155                | WCFS1_000050               |
| OG0000056 | CRL1506_000463, CRL1506_002331 | CRL681_002383, CRL681_002821 | MPL16_001833 | TL2766_000154, TL2766_002250 | WCFS1_000051, WCFS1_002515 |
| OG0002485 | CRL1506_002332                 | CRL681_002820                |              | TL2766_000153                | WCFS1_000052               |
| OG0002486 | CRL1506_002334                 | CRL681_002818                |              | TL2766_000151                | WCFS1_000054               |
| OG0002487 | CRL1506_002335                 | CRL681_002817                |              | TL2766_000150                | WCFS1_000055               |
| OG0002488 | CRL1506_002336                 | CRL681_002816                |              | TL2766_000149                | WCFS1_000056               |
| OG0001421 | CRL1506_002338                 | CRL681_002814                | MPL16_000925 | TL2766_000147                | WCFS1_000058               |
| OG0001422 | CRL1506_002339                 | CRL681_002813                | MPL16_000924 | TL2766_000146                | WCFS1_000059               |

|           |                                |                              |                            |                              |                            |
|-----------|--------------------------------|------------------------------|----------------------------|------------------------------|----------------------------|
| OG0000184 | CRL1506_002340                 | CRL681_002812                | MPL16_000923, MPL16_001781 | TL2766_000145                | WCFS1_000060               |
| OG0001423 | CRL1506_002341                 | CRL681_002811                | MPL16_000922               | TL2766_000144                | WCFS1_000061               |
| OG0001424 | CRL1506_002342                 | CRL681_002810                | MPL16_000921               | TL2766_000143                | WCFS1_000062               |
| OG0001729 | CRL1506_002344                 | CRL681_002808                | MPL16_001055               | TL2766_000141                | WCFS1_000063               |
| OG0002490 | CRL1506_002345                 | CRL681_002807                | MPL16_001054               |                              | WCFS1_000064               |
| OG0001425 | CRL1506_002346                 | CRL681_002806                | MPL16_001053               | TL2766_000139                | WCFS1_000065               |
| OG0001426 | CRL1506_002347                 | CRL681_002805                | MPL16_001052               | TL2766_000138                | WCFS1_000066               |
| OG0001427 | CRL1506_002348                 | CRL681_002804                | MPL16_001051               | TL2766_000137                | WCFS1_000067               |
| OG0001428 | CRL1506_002349                 | CRL681_002803                | MPL16_001050               | TL2766_000136                | WCFS1_000068               |
| OG0001429 | CRL1506_002350                 | CRL681_002802                | MPL16_002648               | TL2766_000135                | WCFS1_000069               |
| OG0001430 | CRL1506_002351                 | CRL681_002801                | MPL16_001696               | TL2766_000134                | WCFS1_000070               |
| OG0001730 | CRL1506_002352                 | CRL681_002800                | MPL16_001695               | TL2766_000545                | WCFS1_000071               |
| OG0002491 | CRL1506_002353                 | CRL681_002799                | MPL16_001694               |                              | WCFS1_000072               |
| OG0001431 | CRL1506_002354                 | CRL681_002798                | MPL16_001693               | TL2766_000547                | WCFS1_000073               |
| OG0002492 | CRL1506_002355                 | CRL681_002797                |                            | TL2766_000548                | WCFS1_000074               |
| OG0002493 | CRL1506_002356                 | CRL681_002796                | MPL16_001691               |                              | WCFS1_000075               |
| OG0001432 | CRL1506_002357                 | CRL681_002795                | MPL16_001690               | TL2766_000550                | WCFS1_000076               |
| OG0001433 | CRL1506_002358                 | CRL681_002794                | MPL16_001689               | TL2766_000551                | WCFS1_000077               |
| OG0001434 | CRL1506_002359                 | CRL681_002793                | MPL16_001688               | TL2766_000552                | WCFS1_000078               |
| OG0001435 | CRL1506_002360                 | CRL681_002792                | MPL16_001687               | TL2766_000553                | WCFS1_000079               |
| OG0001436 | CRL1506_002361                 | CRL681_002791                | MPL16_001686               | TL2766_000554                | WCFS1_000080               |
| OG0001437 | CRL1506_002362                 | CRL681_002790                | MPL16_001685               | TL2766_000555                | WCFS1_000081               |
| OG0001438 | CRL1506_002363                 | CRL681_002789                | MPL16_000936               | TL2766_000556                | WCFS1_000082               |
| OG0001439 | CRL1506_002364                 | CRL681_002788                | MPL16_001156               | TL2766_000557                | WCFS1_000083               |
| OG0001440 | CRL1506_002365                 | CRL681_002787                | MPL16_003155               | TL2766_000558                | WCFS1_000084               |
| OG0001441 | CRL1506_002366                 | CRL681_002786                | MPL16_003156               | TL2766_000559                | WCFS1_000085               |
| OG0001731 | CRL1506_002367                 | CRL681_002785                | MPL16_003157               | TL2766_000560                | WCFS1_000086               |
| OG0000035 | CRL1506_000622, CRL1506_002368 | CRL681_001897, CRL681_002784 | MPL16_002127, MPL16_003158 | TL2766_000561, TL2766_000749 | WCFS1_000087, WCFS1_001008 |
| OG0001442 | CRL1506_002369                 | CRL681_002783                | MPL16_003159               | TL2766_000562                | WCFS1_000088               |
| OG0001443 | CRL1506_002370                 | CRL681_002782                | MPL16_003160               | TL2766_000563                | WCFS1_000089               |
| OG0002494 | CRL1506_002371                 | CRL681_002781                |                            | TL2766_000564                | WCFS1_000090               |
| OG0001732 | CRL1506_002372                 | CRL681_002780                | MPL16_003153               | TL2766_000565                | WCFS1_000091               |

|           |                |               |                                             |               |                            |
|-----------|----------------|---------------|---------------------------------------------|---------------|----------------------------|
| OG0002495 | CRL1506_002373 | CRL681_002779 |                                             | TL2766_000566 | WCFS1_000092               |
| OG0002496 | CRL1506_002374 | CRL681_002778 |                                             | TL2766_000567 | WCFS1_000093               |
| OG0001444 | CRL1506_002375 | CRL681_002777 | MPL16_001999                                | TL2766_000568 | WCFS1_000094               |
| OG0001445 | CRL1506_002376 | CRL681_002776 | MPL16_002000                                | TL2766_000569 | WCFS1_000095               |
| OG0000089 | CRL1506_002377 | CRL681_002775 | MPL16_000283, MPL16_000585,<br>MPL16_002001 | TL2766_000570 | WCFS1_000096               |
| OG0001446 | CRL1506_002378 | CRL681_002774 | MPL16_002002                                | TL2766_000571 | WCFS1_000097               |
| OG0001447 | CRL1506_002379 | CRL681_002773 | MPL16_002003                                | TL2766_000572 | WCFS1_000098               |
| OG0001448 | CRL1506_002380 | CRL681_002772 | MPL16_001643                                | TL2766_000573 | WCFS1_000099               |
| OG0001449 | CRL1506_002381 | CRL681_002771 | MPL16_001644                                | TL2766_002442 | WCFS1_000100               |
| OG0002497 | CRL1506_002382 | CRL681_002770 | MPL16_001645                                |               | WCFS1_000101               |
| OG0001450 | CRL1506_002383 | CRL681_002769 | MPL16_001646                                | TL2766_002441 | WCFS1_000102               |
| OG0001451 | CRL1506_002384 | CRL681_002768 | MPL16_001647                                | TL2766_002440 | WCFS1_000103               |
| OG0001452 | CRL1506_002385 | CRL681_002767 | MPL16_001648                                | TL2766_002439 | WCFS1_000104               |
| OG0001453 | CRL1506_002386 | CRL681_002766 | MPL16_001649                                | TL2766_002438 | WCFS1_000105               |
| OG0002712 | CRL1506_002387 | CRL681_002765 |                                             |               | WCFS1_000106               |
| OG0001733 | CRL1506_002388 | CRL681_002764 | MPL16_001651                                | TL2766_002436 | WCFS1_000107               |
| OG0001734 | CRL1506_002389 | CRL681_002763 | MPL16_001653                                | TL2766_002435 | WCFS1_000108               |
| OG0000185 | CRL1506_002390 | CRL681_002762 | MPL16_001654                                | TL2766_002434 | WCFS1_000109, WCFS1_001507 |
| OG0001454 | CRL1506_002391 | CRL681_002761 | MPL16_001655                                | TL2766_002433 | WCFS1_000110               |
| OG0001455 | CRL1506_002392 | CRL681_002760 | MPL16_001656                                | TL2766_002432 | WCFS1_000111               |
| OG0000186 | CRL1506_002393 | CRL681_002759 | MPL16_001089, MPL16_001657                  | TL2766_002431 | WCFS1_000112               |
| OG0001735 | CRL1506_002394 | CRL681_002758 | MPL16_001658                                | TL2766_002430 | WCFS1_000113               |
| OG0001456 | CRL1506_002395 | CRL681_002757 | MPL16_001659                                | TL2766_002429 | WCFS1_000114               |
| OG0001457 | CRL1506_002396 | CRL681_002756 | MPL16_001660                                | TL2766_002428 | WCFS1_000115               |
| OG0001458 | CRL1506_002397 | CRL681_002755 | MPL16_001661                                | TL2766_002427 | WCFS1_000116               |
| OG0000187 | CRL1506_002398 | CRL681_002754 | MPL16_001003                                | TL2766_002426 | WCFS1_000117, WCFS1_001160 |
| OG0001459 | CRL1506_002399 | CRL681_002753 | MPL16_001004                                | TL2766_002425 | WCFS1_000118               |
| OG0001460 | CRL1506_002400 | CRL681_002752 | MPL16_001005                                | TL2766_002424 | WCFS1_000119               |
| OG0001461 | CRL1506_002401 | CRL681_002751 | MPL16_001006                                | TL2766_002423 | WCFS1_000120               |

|           |                                |                              |                            |                              |                            |
|-----------|--------------------------------|------------------------------|----------------------------|------------------------------|----------------------------|
| OG0002760 |                                | CRL681_002750                |                            | TL2766_002422                | WCFS1_000121               |
| OG0001462 | CRL1506_002403                 | CRL681_002749                | MPL16_001007               | TL2766_002421                | WCFS1_000122               |
| OG0001463 | CRL1506_002404                 | CRL681_002748                | MPL16_001008               | TL2766_002420                | WCFS1_000123               |
| OG0002498 | CRL1506_002405                 | CRL681_002747                |                            | TL2766_002419                | WCFS1_000124               |
| OG0002539 | CRL1506_002406                 |                              | MPL16_001010               | TL2766_002418                | WCFS1_000125               |
| OG0000188 | CRL1506_002407                 | CRL681_002745                | MPL16_001011, MPL16_001571 | TL2766_002417                | WCFS1_000126               |
| OG0001464 | CRL1506_002408                 | CRL681_002744                | MPL16_001012               | TL2766_002416                | WCFS1_000127               |
| OG0001465 | CRL1506_002409                 | CRL681_002743                | MPL16_001013               | TL2766_002415                | WCFS1_000128               |
| OG0001466 | CRL1506_002410                 | CRL681_002742                | MPL16_001014               | TL2766_002414                | WCFS1_000129               |
| OG0001467 | CRL1506_002411                 | CRL681_002741                | MPL16_001015               | TL2766_002413                | WCFS1_000130               |
| OG0001468 | CRL1506_002412                 | CRL681_002740                | MPL16_001016               | TL2766_002412                | WCFS1_000131               |
| OG0001469 | CRL1506_002413                 | CRL681_002739                | MPL16_000520               | TL2766_002411                | WCFS1_000132               |
| OG0001470 | CRL1506_002414                 | CRL681_002738                | MPL16_000519               | TL2766_002410                | WCFS1_000133               |
| OG0001471 | CRL1506_002415                 | CRL681_002737                | MPL16_000518               | TL2766_002409                | WCFS1_000134               |
| OG0000189 | CRL1506_002416                 | CRL681_000798, CRL681_002736 | MPL16_000517               | TL2766_002408                | WCFS1_000135               |
| OG0001472 | CRL1506_002417                 | CRL681_000797, CRL681_002735 |                            | TL2766_002407                | WCFS1_000136               |
| OG0001473 | CRL1506_002418                 | CRL681_002734                | MPL16_002129               | TL2766_002406                | WCFS1_000137               |
| OG0001474 | CRL1506_002419                 | CRL681_002733                | MPL16_002130               | TL2766_002405                | WCFS1_000138               |
| OG0001475 | CRL1506_002420                 | CRL681_002732                | MPL16_002131               | TL2766_002404                | WCFS1_000139               |
| OG0001476 | CRL1506_002421                 | CRL681_002731                | MPL16_002132               | TL2766_002403                | WCFS1_000140               |
| OG0001477 | CRL1506_002422                 | CRL681_002730                | MPL16_002352               | TL2766_002402                | WCFS1_000141               |
| OG0001478 | CRL1506_002423                 | CRL681_002729                | MPL16_002351               | TL2766_002401                | WCFS1_000142               |
| OG0001479 | CRL1506_002424                 | CRL681_002728                | MPL16_002350               | TL2766_002400                | WCFS1_000143               |
| OG0001736 | CRL1506_002425                 | CRL681_002727                | MPL16_002349               | TL2766_002399                | WCFS1_000144               |
| OG0001480 | CRL1506_002426                 | CRL681_002726                | MPL16_002348               | TL2766_002398                | WCFS1_000145               |
| OG0001481 | CRL1506_002427                 | CRL681_002725                | MPL16_002347               | TL2766_002397                | WCFS1_000146               |
| OG0000054 | CRL1506_002235, CRL1506_002428 | CRL681_002724, CRL681_002921 | MPL16_002346               | TL2766_001780, TL2766_002396 | WCFS1_000147, WCFS1_003065 |
| OG0000036 | CRL1506_002429, CRL1506_002764 | CRL681_001258, CRL681_002723 | MPL16_002345, MPL16_003056 | TL2766_002395, TL2766_003090 | WCFS1_000148, WCFS1_001483 |
| OG0002499 | CRL1506_002430                 | CRL681_002722                |                            | TL2766_001736                | WCFS1_000149               |

|           |                                                |                              |                            |                              |                            |
|-----------|------------------------------------------------|------------------------------|----------------------------|------------------------------|----------------------------|
| OG0001482 | CRL1506_002431                                 | CRL681_002721                | MPL16_002344               | TL2766_001735                | WCFS1_000150               |
| OG0001483 | CRL1506_002432                                 | CRL681_002720                | MPL16_002343               | TL2766_001734                | WCFS1_000151               |
| OG0001484 | CRL1506_002433                                 | CRL681_002718                | MPL16_002342               | TL2766_001732                | WCFS1_000152               |
| OG0001485 | CRL1506_002434                                 | CRL681_002717                | MPL16_001184               | TL2766_001731                | WCFS1_000153               |
| OG0001486 | CRL1506_002435                                 | CRL681_002716                | MPL16_001640               | TL2766_001730                | WCFS1_000154               |
| OG0001487 | CRL1506_002436                                 | CRL681_002715                | MPL16_001639               | TL2766_001729                | WCFS1_000155               |
| OG0001488 | CRL1506_002437                                 | CRL681_002714                | MPL16_001638               | TL2766_001728                | WCFS1_000156               |
| OG0001489 | CRL1506_002438                                 | CRL681_002713                | MPL16_001637               | TL2766_001727                | WCFS1_000157               |
| OG0000090 | CRL1506_002439                                 | CRL681_002712, CRL681_002929 | MPL16_001636               | TL2766_001726                | WCFS1_000158, WCFS1_003058 |
| OG0001490 | CRL1506_002440                                 | CRL681_002711                | MPL16_001595               | TL2766_001725                | WCFS1_000159               |
| OG0002540 | CRL1506_002441                                 | CRL681_002710                |                            | TL2766_001724                | WCFS1_000160               |
| OG0001491 | CRL1506_002442                                 | CRL681_002709                | MPL16_001596               | TL2766_001723                | WCFS1_000161               |
| OG0000013 | CRL1506_000095, CRL1506_002443, CRL1506_002444 | CRL681_002707, CRL681_002708 | MPL16_001597, MPL16_001598 | TL2766_001721, TL2766_001722 | WCFS1_000162, WCFS1_000163 |
| OG0001492 | CRL1506_002445                                 | CRL681_002706                | MPL16_001599               | TL2766_001720                | WCFS1_000164               |
| OG0001493 | CRL1506_002446                                 | CRL681_002705                | MPL16_001600               | TL2766_001719                | WCFS1_000165               |
| OG0001494 | CRL1506_002447                                 | CRL681_002704                | MPL16_001601               | TL2766_001718                | WCFS1_000166               |
| OG0001495 | CRL1506_002448                                 | CRL681_002703                | MPL16_001602               | TL2766_001717                | WCFS1_000167               |
| OG0001496 | CRL1506_002449                                 | CRL681_002702                | MPL16_001603               | TL2766_001716                | WCFS1_000168               |
| OG0001497 | CRL1506_002450                                 | CRL681_002701                | MPL16_001604               | TL2766_001715                | WCFS1_000169               |
| OG0001498 | CRL1506_002451                                 | CRL681_002700                | MPL16_001605               | TL2766_001714                | WCFS1_000170               |
| OG0001499 | CRL1506_002452                                 | CRL681_002699                | MPL16_001606               | TL2766_001713                | WCFS1_000171               |
| OG0001500 | CRL1506_002453                                 | CRL681_002698                | MPL16_001607               | TL2766_001712                | WCFS1_000172               |
| OG0001501 | CRL1506_002454                                 | CRL681_002697                | MPL16_001608               | TL2766_001711                | WCFS1_000173               |
| OG0001502 | CRL1506_002455                                 | CRL681_002696                | MPL16_001609               | TL2766_001710                | WCFS1_000174               |
| OG0001503 | CRL1506_002456                                 | CRL681_002695                | MPL16_001610               | TL2766_001709                | WCFS1_000175               |
| OG0001504 | CRL1506_002457                                 | CRL681_002694                | MPL16_001611               | TL2766_001708                | WCFS1_000176               |

|           |                                                                |                              |                                          |                                                                                          |                                          |
|-----------|----------------------------------------------------------------|------------------------------|------------------------------------------|------------------------------------------------------------------------------------------|------------------------------------------|
| OG0000005 | CRL1506_000712, CRL1506_001482, CRL1506_002210, CRL1506_002476 | CRL681_001898                | MPL16_000568, MPL16_001484, MPL16_001594 | TL2766_000236, TL2766_000837, TL2766_001571, TL2766_001737, TL2766_002394, TL2766_002870 | WCFS1_000177, WCFS1_001713, WCFS1_002941 |
| OG0001505 | CRL1506_002458                                                 | CRL681_002693                | MPL16_001612                             | TL2766_001707                                                                            | WCFS1_000178                             |
| OG0001506 | CRL1506_002459                                                 | CRL681_002692                | MPL16_001613                             | TL2766_001706                                                                            | WCFS1_000179                             |
| OG0001507 | CRL1506_002460                                                 | CRL681_002691                | MPL16_001614                             | TL2766_001705                                                                            | WCFS1_000180                             |
| OG0001508 | CRL1506_002461                                                 | CRL681_002690                | MPL16_001615                             | TL2766_001704                                                                            | WCFS1_000181                             |
| OG0001509 | CRL1506_002462                                                 | CRL681_002689                | MPL16_001616                             | TL2766_001703                                                                            | WCFS1_000182                             |
| OG0001510 | CRL1506_002463                                                 | CRL681_002688                | MPL16_001617                             | TL2766_001702                                                                            | WCFS1_000183                             |
| OG0001511 | CRL1506_002464                                                 | CRL681_002687                | MPL16_001618                             | TL2766_001701                                                                            | WCFS1_000184                             |
| OG0000190 | CRL1506_002465                                                 | CRL681_002686                | MPL16_001619                             | TL2766_001700                                                                            | WCFS1_000185, WCFS1_002137               |
| OG0001512 | CRL1506_002466                                                 | CRL681_002685                | MPL16_001620                             | TL2766_001699                                                                            | WCFS1_000186                             |
| OG0001513 | CRL1506_002467                                                 | CRL681_002684                | MPL16_001621                             | TL2766_001698                                                                            | WCFS1_000187                             |
| OG0001514 | CRL1506_002468                                                 | CRL681_002683                | MPL16_001622                             | TL2766_001697                                                                            | WCFS1_000188                             |
| OG0001515 | CRL1506_002469                                                 | CRL681_002682                | MPL16_001623                             | TL2766_001696                                                                            | WCFS1_000189                             |
| OG0001516 | CRL1506_002470                                                 | CRL681_002681                | MPL16_001624                             | TL2766_001695                                                                            | WCFS1_000190                             |
| OG0001517 | CRL1506_002471                                                 | CRL681_002680                | MPL16_001625                             | TL2766_001694                                                                            | WCFS1_000191                             |
| OG0001518 | CRL1506_002472                                                 | CRL681_002679                | MPL16_001626                             | TL2766_001693                                                                            | WCFS1_000192                             |
| OG0001519 | CRL1506_002473                                                 | CRL681_002678                | MPL16_001627                             | TL2766_001692                                                                            | WCFS1_000193                             |
| OG0002500 | CRL1506_002474                                                 | CRL681_002677                | MPL16_001628                             |                                                                                          | WCFS1_000194                             |
| OG0001520 | CRL1506_002475                                                 | CRL681_002676                | MPL16_001629                             | TL2766_001691                                                                            | WCFS1_000195                             |
| OG0001365 | CRL1506_002209                                                 | CRL681_002675                | MPL16_001630                             | TL2766_001690                                                                            | WCFS1_000196                             |
| OG0001364 | CRL1506_002208                                                 | CRL681_002674                | MPL16_001631                             | TL2766_001689                                                                            | WCFS1_000197                             |
| OG0001363 | CRL1506_002207                                                 | CRL681_002673                | MPL16_001632                             | TL2766_001688                                                                            | WCFS1_000198                             |
| OG0002454 | CRL1506_002206                                                 | CRL681_002672                |                                          | TL2766_001687                                                                            | WCFS1_000199                             |
| OG0002453 | CRL1506_002205                                                 | CRL681_002671                |                                          | TL2766_001686                                                                            | WCFS1_000200                             |
| OG0002710 | CRL1506_002204                                                 |                              |                                          | TL2766_001685                                                                            | WCFS1_000201                             |
| OG0002452 | CRL1506_002203                                                 | CRL681_002669                |                                          | TL2766_001684                                                                            | WCFS1_000202                             |
| OG0000053 | CRL1506_002202, CRL1506_002547                                 | CRL681_002668, CRL681_003021 | MPL16_002614                             | TL2766_001683, TL2766_001857                                                             | WCFS1_000203, WCFS1_002955               |



|           |                                |                              |                            |                              |                            |
|-----------|--------------------------------|------------------------------|----------------------------|------------------------------|----------------------------|
| OG0002451 | CRL1506_002201                 | CRL681_002667                |                            | TL2766_001682                | WCFS1_000204               |
| OG0002450 | CRL1506_002200                 | CRL681_002666                |                            | TL2766_001681                | WCFS1_000205               |
| OG0002449 | CRL1506_002199                 | CRL681_002665                |                            | TL2766_001680                | WCFS1_000206               |
| OG0002448 | CRL1506_002198                 | CRL681_002664                |                            | TL2766_001679                | WCFS1_000207               |
| OG0002447 | CRL1506_002197                 | CRL681_002663                |                            | TL2766_001678                | WCFS1_000208               |
| OG0002446 | CRL1506_002196                 | CRL681_002662                |                            | TL2766_001677                | WCFS1_000209               |
| OG0001362 | CRL1506_002195                 | CRL681_002661                | MPL16_000995               | TL2766_001676                | WCFS1_000210               |
| OG0001361 | CRL1506_002194                 | CRL681_002660                | MPL16_000996               | TL2766_001675                | WCFS1_000211               |
| OG0001360 | CRL1506_002193                 | CRL681_002659                | MPL16_000997               | TL2766_001674                | WCFS1_000212               |
| OG0001359 | CRL1506_002192                 | CRL681_002658                | MPL16_000998               | TL2766_001673                | WCFS1_000213               |
| OG0001358 | CRL1506_002191                 | CRL681_002657                | MPL16_000999               | TL2766_001672                | WCFS1_000214               |
| OG0001357 | CRL1506_002190                 | CRL681_002656                | MPL16_001000               | TL2766_001671                | WCFS1_000215               |
| OG0002445 | CRL1506_002189                 | CRL681_002655                |                            | TL2766_001670                | WCFS1_000216               |
| OG0000032 | CRL1506_001767, CRL1506_002188 | CRL681_000532, CRL681_002654 | MPL16_001763, MPL16_002244 | TL2766_001669, TL2766_002082 | WCFS1_000217, WCFS1_002733 |
| OG0001356 | CRL1506_002187                 | CRL681_002653                | MPL16_002245               | TL2766_001668                | WCFS1_000218               |
| OG0001355 | CRL1506_002186                 | CRL681_002652                | MPL16_002246               | TL2766_001667                | WCFS1_000219               |
| OG0000068 | CRL1506_000552, CRL1506_000611 | CRL681_000737, CRL681_002651 | MPL16_002573               | TL2766_000808                | WCFS1_000220, WCFS1_001069 |
| OG0002601 | CRL1506_000614                 | CRL681_000767, CRL681_002650 |                            |                              | WCFS1_000221               |
| OG0002902 |                                | CRL681_002649                |                            |                              | WCFS1_000222               |
| OG0002444 | CRL1506_002185                 |                              | MPL16_002247               | TL2766_001666                | WCFS1_000223               |
| OG0001354 | CRL1506_002184                 | CRL681_002646                | MPL16_002248               | TL2766_001665                | WCFS1_000224               |
| OG0001353 | CRL1506_002183                 | CRL681_002645                | MPL16_002249               | TL2766_001664                | WCFS1_000225               |
| OG0001352 | CRL1506_002182                 | CRL681_002644                | MPL16_002250               | TL2766_001663                | WCFS1_000226               |
| OG0001727 | CRL1506_002181                 | CRL681_002643                | MPL16_002251               | TL2766_001662                | WCFS1_000227               |
| OG0001351 | CRL1506_002180                 | CRL681_002642                | MPL16_002252               | TL2766_001661                | WCFS1_000228               |
| OG0001350 | CRL1506_002179                 | CRL681_002641                | MPL16_002253               | TL2766_001660                | WCFS1_000229               |
| OG0000026 | CRL1506_001259, CRL1506_002178 | CRL681_001645, CRL681_002640 | MPL16_002254, MPL16_002370 | TL2766_001336, TL2766_001659 | WCFS1_000230, WCFS1_000761 |
| OG0002443 | CRL1506_002177                 | CRL681_002639                |                            | TL2766_001658                | WCFS1_000231               |
| OG0002442 | CRL1506_002176                 | CRL681_002638                |                            | TL2766_001657                | WCFS1_000232               |

|           |                                |                              |                            |                              |              |
|-----------|--------------------------------|------------------------------|----------------------------|------------------------------|--------------|
| OG0000174 | CRL1506_002175                 | CRL681_000566, CRL681_002637 | MPL16_002255               | TL2766_001656                | WCFS1_000233 |
| OG0000058 | CRL1506_001541, CRL1506_002174 | CRL681_000567, CRL681_002636 | MPL16_002256               | TL2766_000915, TL2766_001655 | WCFS1_000234 |
| OG0001349 | CRL1506_002173                 | CRL681_002635                | MPL16_002257               | TL2766_001654                | WCFS1_000235 |
| OG0001348 | CRL1506_002172                 | CRL681_002634                | MPL16_002258               | TL2766_001653                | WCFS1_000236 |
| OG0000173 | CRL1506_002171                 | CRL681_002633                | MPL16_002259, MPL16_002917 | TL2766_001652                | WCFS1_000237 |
| OG0001347 | CRL1506_002170                 | CRL681_002632                | MPL16_002260               | TL2766_001651                | WCFS1_000238 |
| OG0001346 | CRL1506_002169                 | CRL681_002631                | MPL16_002234               | TL2766_001650                | WCFS1_000239 |
| OG0001345 | CRL1506_002168                 | CRL681_002630                | MPL16_002233               | TL2766_001649                | WCFS1_000240 |
| OG0001344 | CRL1506_002167                 | CRL681_002629                | MPL16_002232               | TL2766_001648                | WCFS1_000241 |
| OG0001343 | CRL1506_002166                 | CRL681_002628                | MPL16_002231               | TL2766_001647                | WCFS1_000242 |
| OG0001342 | CRL1506_002165                 | CRL681_002627                | MPL16_002230               | TL2766_001646                | WCFS1_000243 |
| OG0001341 | CRL1506_002164                 | CRL681_002626                | MPL16_002229               | TL2766_001645                | WCFS1_000244 |
| OG0001340 | CRL1506_002163                 | CRL681_002625                | MPL16_002228               | TL2766_001644                | WCFS1_000245 |
| OG0001339 | CRL1506_002162                 | CRL681_002624                | MPL16_002227               | TL2766_001643                | WCFS1_000246 |
| OG0001338 | CRL1506_002161                 | CRL681_002623                | MPL16_002226               | TL2766_001642                | WCFS1_000247 |
| OG0002616 |                                | CRL681_002622                | MPL16_002225               | TL2766_001641                | WCFS1_000248 |
| OG0001337 | CRL1506_002159                 | CRL681_002621                | MPL16_002224               | TL2766_001640                | WCFS1_000249 |
| OG0002441 | CRL1506_002158                 | CRL681_002620                |                            | TL2766_001639                | WCFS1_000250 |
| OG0001336 | CRL1506_002157                 | CRL681_002619                | MPL16_002222               | TL2766_001638                | WCFS1_000251 |
| OG0001335 | CRL1506_002156                 | CRL681_002618                | MPL16_002221               | TL2766_001637                | WCFS1_000252 |
| OG0001334 | CRL1506_002155                 | CRL681_002617                | MPL16_002220               | TL2766_001636                | WCFS1_000253 |
| OG0001333 | CRL1506_002154                 | CRL681_002616                | MPL16_002219               | TL2766_001635                | WCFS1_000254 |
| OG0001332 | CRL1506_002153                 | CRL681_002615                | MPL16_002218               | TL2766_001634                | WCFS1_000255 |
| OG0001331 | CRL1506_002152                 | CRL681_002614                | MPL16_002217               | TL2766_001633                | WCFS1_000256 |
| OG0001330 | CRL1506_002151                 | CRL681_002613                | MPL16_002216               | TL2766_001632                | WCFS1_000257 |
| OG0001329 | CRL1506_002150                 | CRL681_002612                | MPL16_000894               | TL2766_001631                | WCFS1_000258 |
| OG0001328 | CRL1506_002149                 | CRL681_002611                | MPL16_000895               | TL2766_001630                | WCFS1_000259 |
| OG0001327 | CRL1506_002148                 | CRL681_002610                | MPL16_000896               | TL2766_001629                | WCFS1_000260 |
| OG0001326 | CRL1506_002147                 | CRL681_002609                | MPL16_000897               | TL2766_001628                | WCFS1_000261 |
| OG0001325 | CRL1506_002146                 | CRL681_002608                | MPL16_000898               | TL2766_001627                | WCFS1_000262 |
| OG0001324 | CRL1506_002145                 | CRL681_002607                | MPL16_000899               | TL2766_001626                | WCFS1_000263 |

|           |                |               |              |               |              |
|-----------|----------------|---------------|--------------|---------------|--------------|
| OG0001323 | CRL1506_002141 | CRL681_002603 | MPL16_000900 | TL2766_001622 | WCFS1_000264 |
| OG0001322 | CRL1506_002140 | CRL681_002602 | MPL16_000901 | TL2766_001621 | WCFS1_000265 |
| OG0001321 | CRL1506_002139 | CRL681_002601 | MPL16_000902 | TL2766_001620 | WCFS1_000266 |
| OG0001320 | CRL1506_002138 | CRL681_002600 | MPL16_000903 | TL2766_001619 | WCFS1_000267 |
| OG0001319 | CRL1506_002137 | CRL681_002599 | MPL16_000904 | TL2766_001618 | WCFS1_000268 |
| OG0001318 | CRL1506_002136 | CRL681_002598 | MPL16_000905 | TL2766_001617 | WCFS1_000269 |
| OG0001317 | CRL1506_002135 | CRL681_002597 | MPL16_000906 | TL2766_001616 | WCFS1_000270 |
| OG0001316 | CRL1506_002134 | CRL681_002596 | MPL16_000907 | TL2766_001615 | WCFS1_000271 |
| OG0001315 | CRL1506_002133 | CRL681_002595 | MPL16_000908 | TL2766_001614 | WCFS1_000272 |
| OG0001314 | CRL1506_002132 | CRL681_002594 | MPL16_000909 | TL2766_001613 | WCFS1_000273 |
| OG0001313 | CRL1506_002131 | CRL681_002593 | MPL16_000910 | TL2766_001612 | WCFS1_000274 |
| OG0001312 | CRL1506_002130 | CRL681_002592 | MPL16_000911 | TL2766_001611 | WCFS1_000275 |
| OG0001311 | CRL1506_002129 | CRL681_002591 | MPL16_000912 | TL2766_001610 | WCFS1_000276 |
| OG0001310 | CRL1506_002128 | CRL681_002590 | MPL16_000913 | TL2766_001609 | WCFS1_000277 |
| OG0002338 | CRL1506_000773 | CRL681_002589 | MPL16_000914 | TL2766_001608 | WCFS1_000278 |
| OG0002337 | CRL1506_000772 | CRL681_002588 | MPL16_000915 | TL2766_001607 | WCFS1_000279 |
| OG0002336 | CRL1506_000771 | CRL681_002587 | MPL16_000916 | TL2766_001606 | WCFS1_000280 |
| OG0002335 | CRL1506_000770 | CRL681_002586 | MPL16_000917 | TL2766_001605 | WCFS1_000281 |
| OG0002334 | CRL1506_000769 | CRL681_002585 | MPL16_000918 | TL2766_001604 | WCFS1_000282 |
| OG0002333 | CRL1506_000768 | CRL681_002584 | MPL16_000919 | TL2766_001603 | WCFS1_000283 |
| OG0002332 | CRL1506_000767 | CRL681_002583 | MPL16_000920 | TL2766_001602 | WCFS1_000284 |
| OG0002759 |                | CRL681_002582 | MPL16_002240 |               | WCFS1_000285 |
| OG0002331 | CRL1506_000765 | CRL681_002577 | MPL16_002239 | TL2766_001596 | WCFS1_000286 |
| OG0002330 | CRL1506_000764 | CRL681_002576 | MPL16_001634 | TL2766_001595 | WCFS1_000287 |
| OG0002329 | CRL1506_000763 | CRL681_002575 | MPL16_001213 | TL2766_001594 | WCFS1_000288 |
| OG0002328 | CRL1506_000762 | CRL681_002574 | MPL16_001212 | TL2766_001593 | WCFS1_000289 |
| OG0002327 | CRL1506_000761 | CRL681_002573 | MPL16_001211 | TL2766_001592 | WCFS1_000290 |
| OG0002326 | CRL1506_000760 | CRL681_002572 | MPL16_001210 | TL2766_001591 | WCFS1_000291 |
| OG0002325 | CRL1506_000759 | CRL681_002571 | MPL16_001209 | TL2766_001590 | WCFS1_000292 |
| OG0002324 | CRL1506_000758 | CRL681_002570 | MPL16_001208 | TL2766_001589 | WCFS1_000293 |
| OG0002323 | CRL1506_000757 | CRL681_002569 | MPL16_001207 | TL2766_001588 | WCFS1_000294 |
| OG0002322 | CRL1506_000756 | CRL681_002568 | MPL16_001206 | TL2766_001587 | WCFS1_000295 |
| OG0002321 | CRL1506_000755 | CRL681_002567 | MPL16_001205 | TL2766_001586 | WCFS1_000296 |
| OG0002320 | CRL1506_000754 | CRL681_002566 | MPL16_001204 | TL2766_001585 | WCFS1_000297 |

|           |                                                                                                                |                                                                                          |                            |                                                                                          |                                                                                    |
|-----------|----------------------------------------------------------------------------------------------------------------|------------------------------------------------------------------------------------------|----------------------------|------------------------------------------------------------------------------------------|------------------------------------------------------------------------------------|
| OG0002319 | CRL1506_000753                                                                                                 | CRL681_002565                                                                            | MPL16_001203               | TL2766_001584                                                                            | WCFS1_000298                                                                       |
| OG0002318 | CRL1506_000752                                                                                                 | CRL681_002564                                                                            | MPL16_001202               | TL2766_001583                                                                            | WCFS1_000299                                                                       |
| OG0002317 | CRL1506_000751                                                                                                 | CRL681_002563                                                                            | MPL16_001201               | TL2766_001582                                                                            | WCFS1_000300                                                                       |
| OG0002316 | CRL1506_000750                                                                                                 | CRL681_002562                                                                            | MPL16_001200               | TL2766_001581                                                                            | WCFS1_000301                                                                       |
| OG0002315 | CRL1506_000749                                                                                                 | CRL681_002561                                                                            | MPL16_001199               | TL2766_001580                                                                            | WCFS1_000302                                                                       |
| OG0002610 | CRL1506_000748                                                                                                 | CRL681_002560                                                                            |                            | TL2766_001579                                                                            | WCFS1_000303                                                                       |
| OG0002314 | CRL1506_000747                                                                                                 | CRL681_002559                                                                            | MPL16_001197               | TL2766_001578                                                                            | WCFS1_000304                                                                       |
| OG0002313 | CRL1506_000746                                                                                                 | CRL681_002558                                                                            | MPL16_001196               | TL2766_001577                                                                            | WCFS1_000305                                                                       |
| OG0002312 | CRL1506_000745                                                                                                 | CRL681_002557                                                                            | MPL16_001195               | TL2766_001576                                                                            | WCFS1_000306                                                                       |
| OG0002898 |                                                                                                                | CRL681_002556                                                                            |                            |                                                                                          | WCFS1_000307                                                                       |
| OG0002311 | CRL1506_000744                                                                                                 | CRL681_002555                                                                            | MPL16_001194               | TL2766_000443                                                                            | WCFS1_000308                                                                       |
| OG0002310 | CRL1506_000743                                                                                                 | CRL681_002554                                                                            | MPL16_001193               | TL2766_000442                                                                            | WCFS1_000309                                                                       |
| OG0002309 | CRL1506_000742                                                                                                 | CRL681_002553                                                                            | MPL16_001192               | TL2766_000441                                                                            | WCFS1_000310                                                                       |
| OG0002308 | CRL1506_000741                                                                                                 | CRL681_002552                                                                            | MPL16_001191               | TL2766_000440                                                                            | WCFS1_000311                                                                       |
| OG0000028 | CRL1506_000740, CRL1506_001294                                                                                 | CRL681_001610, CRL681_002551                                                             | MPL16_001190, MPL16_002166 | TL2766_000439, TL2766_001371                                                             | WCFS1_000312, WCFS1_000726                                                         |
| OG0002307 | CRL1506_000739                                                                                                 | CRL681_002550                                                                            | MPL16_001189               | TL2766_000438                                                                            | WCFS1_000313                                                                       |
| OG0002306 | CRL1506_000738                                                                                                 | CRL681_002549                                                                            | MPL16_001188               | TL2766_000437                                                                            | WCFS1_000314                                                                       |
| OG0002609 | CRL1506_000737                                                                                                 | CRL681_002548                                                                            |                            | TL2766_000436                                                                            | WCFS1_000315                                                                       |
| OG0002921 |                                                                                                                | CRL681_002546                                                                            |                            |                                                                                          | WCFS1_000317                                                                       |
| OG0002758 |                                                                                                                | CRL681_002545                                                                            |                            | TL2766_000421                                                                            | WCFS1_000318                                                                       |
| OG0000001 | CRL1506_000051, CRL1506_000589, CRL1506_000590, CRL1506_000728, CRL1506_000731, CRL1506_000733, CRL1506_000734 | CRL681_002529, CRL681_002532, CRL681_002535, CRL681_002536, CRL681_002543, CRL681_002544 |                            | TL2766_000356, TL2766_000423, TL2766_000426, TL2766_000427, TL2766_000432, TL2766_000433 | WCFS1_000319, WCFS1_000320, WCFS1_000325, WCFS1_000326, WCFS1_000329, WCFS1_000332 |
| OG0002598 | CRL1506_000594                                                                                                 | CRL681_002540                                                                            |                            | TL2766_000431                                                                            | WCFS1_000321                                                                       |
| OG0000109 | CRL1506_000583, CRL1506_000588, CRL1506_000591, CRL1506_000735                                                 | CRL681_002539                                                                            |                            | TL2766_000430                                                                            | WCFS1_000322                                                                       |
| OG0002757 |                                                                                                                | CRL681_002538                                                                            |                            | TL2766_000429                                                                            | WCFS1_000323                                                                       |

|           |                                |                              |                            |                              |                            |
|-----------|--------------------------------|------------------------------|----------------------------|------------------------------|----------------------------|
| OG0000276 | CRL1506_000050                 | CRL681_002537                |                            | TL2766_000357, TL2766_000428 | WCFS1_000324               |
| OG0002769 |                                | CRL681_002534                |                            | TL2766_000425                | WCFS1_000327               |
| OG0002608 | CRL1506_000732                 | CRL681_002533                |                            | TL2766_000424                | WCFS1_000328               |
| OG0002746 | CRL1506_000730                 | CRL681_002531                |                            |                              | WCFS1_000330               |
| OG0002597 | CRL1506_000582, CRL1506_000729 | CRL681_002530                |                            |                              | WCFS1_000331               |
| OG0002305 | CRL1506_000727                 | CRL681_002528                | MPL16_001187               | TL2766_000419                | WCFS1_000333               |
| OG0002607 | CRL1506_000726                 |                              | MPL16_001186               | TL2766_000418                | WCFS1_000334               |
| OG0002304 | CRL1506_000725                 | CRL681_002526                | MPL16_000245               | TL2766_000417                | WCFS1_000335               |
| OG0000243 | CRL1506_000724                 | CRL681_002525                | MPL16_002037, MPL16_002148 | TL2766_000416                | WCFS1_000336               |
| OG0002303 | CRL1506_000723                 | CRL681_002524                | MPL16_002147               | TL2766_000415                | WCFS1_000337               |
| OG0002302 | CRL1506_000722                 | CRL681_002523                | MPL16_001813               | TL2766_000414                | WCFS1_000338               |
| OG0002301 | CRL1506_000721                 | CRL681_002522                | MPL16_001812               | TL2766_000413                | WCFS1_000339               |
| OG0000114 | CRL1506_000016, CRL1506_000720 | CRL681_002521                | MPL16_002174               | TL2766_000390                | WCFS1_000340               |
| OG0002300 | CRL1506_000719                 | CRL681_002520                | MPL16_001809               | TL2766_000405                | WCFS1_000341               |
| OG0002606 | CRL1506_000718                 | CRL681_002519                | MPL16_001808               |                              | WCFS1_000342               |
| OG0002605 | CRL1506_000717                 | CRL681_002518                | MPL16_001807               |                              | WCFS1_000343               |
| OG0002604 | CRL1506_000716                 | CRL681_002517                | MPL16_001806               |                              | WCFS1_000344               |
| OG0002745 | CRL1506_000715                 | CRL681_002516                |                            |                              | WCFS1_000345               |
| OG0002897 |                                | CRL681_002515                |                            |                              | WCFS1_000346               |
| OG0002346 | CRL1506_000002                 | CRL681_002514                | MPL16_001804               |                              | WCFS1_000347               |
| OG0000248 | CRL1506_000003                 | CRL681_000806                | MPL16_001803               | TL2766_000403                | WCFS1_000348               |
| OG0000249 | CRL1506_000004                 | CRL681_000807                | MPL16_001802               | TL2766_000402                | WCFS1_000349               |
| OG0000047 | CRL1506_000005, CRL1506_000006 | CRL681_000808, CRL681_000809 | MPL16_001800               | TL2766_000400, TL2766_000401 | WCFS1_000350, WCFS1_000351 |
| OG0000250 | CRL1506_000007                 | CRL681_000810                | MPL16_001799               | TL2766_000399                | WCFS1_000352               |
| OG0000251 | CRL1506_000008                 | CRL681_000811                | MPL16_001798               | TL2766_000398                | WCFS1_000353               |
| OG0000252 | CRL1506_000009                 | CRL681_000812                | MPL16_001797               | TL2766_000397                | WCFS1_000354               |
| OG0000253 | CRL1506_000010                 | CRL681_000813                | MPL16_002168               | TL2766_000396                | WCFS1_000355               |
| OG0002347 | CRL1506_000011                 |                              | MPL16_002169               | TL2766_000395                | WCFS1_000356               |
| OG0000254 | CRL1506_000013                 | CRL681_000816                | MPL16_002171               | TL2766_000393                | WCFS1_000358               |

|           |                                                                |                                                            |                            |                                                            |                                          |
|-----------|----------------------------------------------------------------|------------------------------------------------------------|----------------------------|------------------------------------------------------------|------------------------------------------|
| OG0000255 | CRL1506_000014                                                 | CRL681_000817                                              | MPL16_002172               | TL2766_000392                                              | WCFS1_000359                             |
| OG0000256 | CRL1506_000015                                                 | CRL681_000818                                              | MPL16_002173               | TL2766_000391                                              | WCFS1_000360                             |
| OG0002969 |                                                                | CRL681_000819                                              |                            |                                                            | WCFS1_000361                             |
| OG0002968 |                                                                | CRL681_000820                                              |                            |                                                            | WCFS1_000362                             |
| OG0000257 | CRL1506_000017                                                 | CRL681_000821                                              | MPL16_002175               | TL2766_000389                                              | WCFS1_000363                             |
| OG0000258 | CRL1506_000018                                                 | CRL681_000822                                              | MPL16_002176               | TL2766_000388                                              | WCFS1_000364                             |
| OG0000259 | CRL1506_000019                                                 | CRL681_000823                                              | MPL16_002177               | TL2766_000387                                              | WCFS1_000365                             |
| OG0000260 | CRL1506_000020                                                 | CRL681_000824                                              | MPL16_002178               | TL2766_000386                                              | WCFS1_000366                             |
| OG0000261 | CRL1506_000021                                                 | CRL681_000825                                              | MPL16_002179               | TL2766_000385                                              | WCFS1_000367                             |
| OG0000262 | CRL1506_000022                                                 | CRL681_000826                                              | MPL16_002180               | TL2766_000384                                              | WCFS1_000368                             |
| OG0000263 | CRL1506_000023                                                 | CRL681_000827                                              | MPL16_002181               | TL2766_000383                                              | WCFS1_000369                             |
| OG0002354 | CRL1506_000024                                                 | CRL681_000828                                              |                            | TL2766_000382                                              | WCFS1_000370                             |
| OG0000004 | CRL1506_000025, CRL1506_000254, CRL1506_000255, CRL1506_001852 | CRL681_000444, CRL681_000445, CRL681_000829, CRL681_002509 | MPL16_001276, MPL16_001277 | TL2766_000381, TL2766_002166, TL2766_002841, TL2766_002842 | WCFS1_000371, WCFS1_002364, WCFS1_002365 |
| OG0002348 | CRL1506_000026                                                 | CRL681_000830                                              |                            | TL2766_000380                                              | WCFS1_000372                             |
| OG0002349 | CRL1506_000027                                                 | CRL681_000831                                              |                            | TL2766_000379                                              | WCFS1_000373                             |
| OG0000019 | CRL1506_000028, CRL1506_000441                                 | CRL681_000832, CRL681_002361                               | MPL16_000418, MPL16_002603 | TL2766_000378, TL2766_002607                               | WCFS1_000374, WCFS1_002493               |
| OG0002350 | CRL1506_000029                                                 | CRL681_000833                                              |                            | TL2766_000377                                              | WCFS1_000375                             |
| OG0002351 | CRL1506_000030                                                 | CRL681_000834                                              |                            | TL2766_000376                                              | WCFS1_000376                             |
| OG0002352 | CRL1506_000031                                                 | CRL681_000835                                              |                            | TL2766_000375                                              | WCFS1_000377                             |
| OG0000264 | CRL1506_000032                                                 | CRL681_000836                                              | MPL16_000927               | TL2766_000374                                              | WCFS1_000378                             |
| OG0000265 | CRL1506_000033                                                 | CRL681_000837                                              | MPL16_000928               | TL2766_000373                                              | WCFS1_000379                             |
| OG0000266 | CRL1506_000034                                                 | CRL681_000838                                              | MPL16_000929               | TL2766_000372                                              | WCFS1_000380                             |
| OG0000267 | CRL1506_000035                                                 | CRL681_000839                                              | MPL16_000930               | TL2766_000371                                              | WCFS1_000381                             |
| OG0002792 |                                                                | CRL681_000840                                              |                            | TL2766_000370                                              | WCFS1_000382                             |
| OG0000268 | CRL1506_000037                                                 | CRL681_000841                                              | MPL16_000931               | TL2766_000369                                              | WCFS1_000383                             |
| OG0000269 | CRL1506_000038                                                 | CRL681_000842                                              | MPL16_000932               | TL2766_000368                                              | WCFS1_000384                             |
| OG0000270 | CRL1506_000039                                                 | CRL681_000843                                              | MPL16_000933               | TL2766_000367                                              | WCFS1_000385                             |
| OG0000271 | CRL1506_000040                                                 | CRL681_000844                                              | MPL16_000934               | TL2766_000366                                              | WCFS1_000386                             |
| OG0000272 | CRL1506_000041                                                 | CRL681_000845                                              | MPL16_000935               | TL2766_000365                                              | WCFS1_000387                             |
| OG0000273 | CRL1506_000042                                                 | CRL681_000846                                              | MPL16_001182               | TL2766_000364                                              | WCFS1_000388                             |

|           |                                |                              |                            |                              |                                          |
|-----------|--------------------------------|------------------------------|----------------------------|------------------------------|------------------------------------------|
| OG0000274 | CRL1506_000043                 | CRL681_000847                | MPL16_001181               | TL2766_000363                | WCFS1_000389                             |
| OG0002353 | CRL1506_000045                 | CRL681_000849                |                            | TL2766_000362                | WCFS1_000390                             |
| OG0000275 | CRL1506_000046                 | CRL681_000850                | MPL16_001179               | TL2766_000361                | WCFS1_000391                             |
| OG0000323 | CRL1506_000047                 | CRL681_000851                | MPL16_001178               | TL2766_000360                | WCFS1_000392                             |
| OG0000277 | CRL1506_000052                 | CRL681_000852                | MPL16_001177               | TL2766_000355                | WCFS1_000393                             |
| OG0000278 | CRL1506_000053                 | CRL681_000853                | MPL16_001176               | TL2766_000354                | WCFS1_000394                             |
| OG0000279 | CRL1506_000054                 | CRL681_000854                | MPL16_001175               | TL2766_000353                | WCFS1_000395                             |
| OG0000020 | CRL1506_000055, CRL1506_001360 | CRL681_000855, CRL681_000945 | MPL16_001174, MPL16_002490 | TL2766_000352, TL2766_001178 | WCFS1_000396, WCFS1_001846               |
| OG0000280 | CRL1506_000056                 | CRL681_000856                | MPL16_001173               | TL2766_000351                | WCFS1_000397                             |
| OG0000324 | CRL1506_000057                 | CRL681_000857                | MPL16_001172               | TL2766_000350                | WCFS1_000398                             |
| OG0000281 | CRL1506_000058                 | CRL681_000858                | MPL16_001171               | TL2766_000349                | WCFS1_000399                             |
| OG0000325 | CRL1506_000059                 | CRL681_000859                | MPL16_001170               | TL2766_000348                | WCFS1_000400                             |
| OG0000282 | CRL1506_000060                 | CRL681_000860                | MPL16_001169               | TL2766_000347                | WCFS1_000401                             |
| OG0000283 | CRL1506_000061                 | CRL681_000861                | MPL16_001168               | TL2766_000346                | WCFS1_000402                             |
| OG0000284 | CRL1506_000062                 | CRL681_000862                | MPL16_001167               | TL2766_000345                | WCFS1_000403                             |
| OG0000285 | CRL1506_000063                 | CRL681_000863                | MPL16_001166               | TL2766_000344                | WCFS1_000404                             |
| OG0000171 | CRL1506_002105                 | CRL681_000111                | MPL16_002781               | TL2766_000450                | WCFS1_000405, WCFS1_002017               |
| OG0003472 |                                |                              |                            |                              | WCFS1_000406                             |
| OG0003473 |                                |                              |                            |                              | WCFS1_000407                             |
| OG0003474 |                                |                              |                            |                              | WCFS1_000408                             |
| OG0003475 |                                |                              |                            |                              | WCFS1_000409                             |
| OG0000116 | CRL1506_000089                 | CRL681_000886                | MPL16_001028               | TL2766_000318                | WCFS1_000410, WCFS1_000444               |
| OG0000117 | CRL1506_000091                 | CRL681_000888                | MPL16_001026               | TL2766_000316                | WCFS1_000411, WCFS1_000446               |
| OG0000130 | CRL1506_001092                 | CRL681_001817                | MPL16_001394               | TL2766_000672                | WCFS1_000412, WCFS1_000933               |
| OG0003476 |                                |                              |                            |                              | WCFS1_000413                             |
| OG0000064 | CRL1506_002532                 | CRL681_002998                | MPL16_003167, MPL16_003175 | TL2766_001833                | WCFS1_000414, WCFS1_002654, WCFS1_002979 |

|           |                |               |              |                              |                            |
|-----------|----------------|---------------|--------------|------------------------------|----------------------------|
| OG0000151 | CRL1506_001450 | CRL681_003126 | MPL16_002654 | TL2766_000477                | WCFS1_000415, WCFS1_002853 |
| OG0000097 | CRL1506_002952 | CRL681_002199 | MPL16_000801 | TL2766_000292, TL2766_003051 | WCFS1_000416, WCFS1_001441 |
| OG0002995 |                |               | MPL16_001165 |                              | WCFS1_000417               |
| OG0002996 |                |               | MPL16_001164 |                              | WCFS1_000418               |
| OG0002994 |                |               | MPL16_001163 |                              | WCFS1_000419               |
| OG0002993 |                |               | MPL16_001162 |                              | WCFS1_000420               |
| OG0002992 |                |               | MPL16_001161 |                              | WCFS1_000421               |
| OG0000286 | CRL1506_000064 | CRL681_000864 | MPL16_001160 | TL2766_000343                | WCFS1_000422               |
| OG0000287 | CRL1506_000065 | CRL681_000865 | MPL16_001159 | TL2766_000342                | WCFS1_000423               |
| OG0000288 | CRL1506_000066 | CRL681_000866 | MPL16_001158 | TL2766_000341                | WCFS1_000424               |
| OG0000289 | CRL1506_000067 | CRL681_000867 | MPL16_001157 | TL2766_000340                | WCFS1_000425               |
| OG0000290 | CRL1506_000068 | CRL681_000868 | MPL16_001049 | TL2766_000339                | WCFS1_000426               |
| OG0000291 | CRL1506_000069 | CRL681_000869 | MPL16_001048 | TL2766_000338                | WCFS1_000427               |
| OG0000292 | CRL1506_000070 | CRL681_000870 | MPL16_001047 | TL2766_000337                | WCFS1_000428               |
| OG0000293 | CRL1506_000071 | CRL681_000871 | MPL16_001046 | TL2766_000336                | WCFS1_000429               |
| OG0000294 | CRL1506_000072 | CRL681_000872 | MPL16_001045 | TL2766_000335                | WCFS1_000430               |
| OG0000295 | CRL1506_000073 | CRL681_000873 | MPL16_001044 | TL2766_000334                | WCFS1_000431               |
| OG0000296 | CRL1506_000074 | CRL681_000874 | MPL16_001043 | TL2766_000333                | WCFS1_000432               |
| OG0000297 | CRL1506_000075 | CRL681_000875 | MPL16_001042 | TL2766_000332                | WCFS1_000433               |
| OG0000298 | CRL1506_000076 | CRL681_000876 | MPL16_001041 | TL2766_000331                | WCFS1_000434               |
| OG0000299 | CRL1506_000077 | CRL681_000877 | MPL16_001040 | TL2766_000330                | WCFS1_000435               |
| OG0000326 | CRL1506_000078 | CRL681_000878 | MPL16_001039 | TL2766_000329                | WCFS1_000436               |
| OG0000115 | CRL1506_000079 | CRL681_000879 | MPL16_001038 | TL2766_000328, TL2766_002458 | WCFS1_000437               |
| OG0000300 | CRL1506_000080 | CRL681_000880 | MPL16_001037 | TL2766_000327                | WCFS1_000438               |
| OG0000301 | CRL1506_000081 | CRL681_000881 | MPL16_001036 | TL2766_000326                | WCFS1_000439               |
| OG0000302 | CRL1506_000082 | CRL681_000882 | MPL16_001035 | TL2766_000325                | WCFS1_000440               |



|           |                                |                                                                                                |                            |                                                               |                            |
|-----------|--------------------------------|------------------------------------------------------------------------------------------------|----------------------------|---------------------------------------------------------------|----------------------------|
| OG0000006 | CRL1506_000083, CRL1506_001737 | CRL681_000457, CRL681_000502,<br>CRL681_000583, CRL681_000707,<br>CRL681_000883, CRL681_002260 | MPL16_001034, MPL16_002283 | TL2766_000324, TL2766_002020,<br>TL2766_002052, TL2766_002445 | WCFS1_000441, WCFS1_002763 |
| OG0000304 | CRL1506_000087                 | CRL681_000884                                                                                  | MPL16_001030               | TL2766_000320                                                 | WCFS1_000442               |
| OG0000305 | CRL1506_000088                 | CRL681_000885                                                                                  | MPL16_001029               | TL2766_000319                                                 | WCFS1_000443               |
| OG0000306 | CRL1506_000090                 | CRL681_000887                                                                                  | MPL16_001027               | TL2766_000317                                                 | WCFS1_000445               |
| OG0000307 | CRL1506_000092                 | CRL681_000889                                                                                  | MPL16_001025               | TL2766_000315                                                 | WCFS1_000447               |
| OG0000308 | CRL1506_000093                 | CRL681_000890                                                                                  | MPL16_001024               | TL2766_000314                                                 | WCFS1_000448               |
| OG0000309 | CRL1506_000094                 | CRL681_000891                                                                                  | MPL16_001023               | TL2766_000313                                                 | WCFS1_000449               |
| OG0000310 | CRL1506_000097                 | CRL681_000892                                                                                  | MPL16_001022               | TL2766_000312                                                 | WCFS1_000450               |
| OG0000311 | CRL1506_000098                 | CRL681_000893                                                                                  | MPL16_001021               | TL2766_000311                                                 | WCFS1_000451               |
| OG0000312 | CRL1506_000099                 | CRL681_000894                                                                                  | MPL16_001020               | TL2766_000310                                                 | WCFS1_000452               |
| OG0000118 | CRL1506_000100                 | CRL681_000895                                                                                  | MPL16_001019, MPL16_001920 | TL2766_000309                                                 | WCFS1_000453               |
| OG0000119 | CRL1506_000101                 | CRL681_000896                                                                                  | MPL16_001018, MPL16_001919 | TL2766_000308                                                 | WCFS1_000454               |
| OG0000313 | CRL1506_000102                 | CRL681_000897                                                                                  | MPL16_001918               | TL2766_000307                                                 | WCFS1_000455               |
| OG0000314 | CRL1506_000103                 | CRL681_000898                                                                                  | MPL16_001917               | TL2766_000306                                                 | WCFS1_000456               |
| OG0000315 | CRL1506_000104                 | CRL681_000899                                                                                  | MPL16_001916               | TL2766_000305                                                 | WCFS1_000457               |
| OG0000316 | CRL1506_000105                 | CRL681_000900                                                                                  | MPL16_001915               | TL2766_000304                                                 | WCFS1_000458               |
| OG0000317 | CRL1506_000106                 | CRL681_000901                                                                                  | MPL16_001914               | TL2766_000303                                                 | WCFS1_000459               |
| OG0000318 | CRL1506_000107                 | CRL681_000902                                                                                  | MPL16_001913               | TL2766_000302                                                 | WCFS1_000460               |
| OG0000319 | CRL1506_000108                 | CRL681_000903                                                                                  | MPL16_001912               | TL2766_000301                                                 | WCFS1_000461               |
| OG0000320 | CRL1506_000109                 | CRL681_000904                                                                                  | MPL16_001911               | TL2766_000300                                                 | WCFS1_000462               |
| OG0000321 | CRL1506_000110                 | CRL681_000905                                                                                  | MPL16_001910               | TL2766_000299                                                 | WCFS1_000463               |
| OG0000322 | CRL1506_000111                 | CRL681_000906                                                                                  | MPL16_001909               | TL2766_000298                                                 | WCFS1_000464               |
| OG0000376 | CRL1506_000858                 | CRL681_001408                                                                                  | MPL16_002292               | TL2766_001565                                                 | WCFS1_000472               |
| OG0000377 | CRL1506_000859                 | CRL681_001409                                                                                  | MPL16_002293               | TL2766_001564                                                 | WCFS1_000473               |
| OG0002356 | CRL1506_000862                 | CRL681_001412                                                                                  |                            | TL2766_001561                                                 | WCFS1_000476               |
| OG0000378 | CRL1506_000863                 | CRL681_001413                                                                                  | MPL16_002296               | TL2766_001560                                                 | WCFS1_000477               |
| OG0000379 | CRL1506_000864                 | CRL681_001414                                                                                  | MPL16_002297               | TL2766_001559                                                 | WCFS1_000478               |

|           |                |                              |              |               |              |
|-----------|----------------|------------------------------|--------------|---------------|--------------|
| OG0002357 | CRL1506_000865 | CRL681_001415                |              | TL2766_001558 | WCFS1_000479 |
| OG0000380 | CRL1506_000866 | CRL681_001416                | MPL16_002299 | TL2766_001557 | WCFS1_000480 |
| OG0000381 | CRL1506_000867 | CRL681_001417                | MPL16_002300 | TL2766_001556 | WCFS1_000481 |
| OG0000382 | CRL1506_000868 | CRL681_001418                | MPL16_002301 | TL2766_001555 | WCFS1_000482 |
| OG0000383 | CRL1506_000869 | CRL681_001419                | MPL16_002302 | TL2766_001554 | WCFS1_000483 |
| OG0000384 | CRL1506_000870 | CRL681_001420                | MPL16_002303 | TL2766_001553 | WCFS1_000484 |
| OG0000385 | CRL1506_000871 | CRL681_001421                | MPL16_002304 | TL2766_001552 | WCFS1_000485 |
| OG0000386 | CRL1506_000872 | CRL681_001422                | MPL16_002305 | TL2766_001551 | WCFS1_000486 |
| OG0000387 | CRL1506_000873 | CRL681_001423                | MPL16_002306 | TL2766_001550 | WCFS1_000487 |
| OG0000120 | CRL1506_000874 | CRL681_000012, CRL681_001424 | MPL16_002307 | TL2766_001549 | WCFS1_000488 |
| OG0000388 | CRL1506_000875 | CRL681_001425                | MPL16_002308 | TL2766_001548 | WCFS1_000489 |
| OG0000389 | CRL1506_000876 | CRL681_001426                | MPL16_002309 | TL2766_001547 | WCFS1_000490 |
| OG0000390 | CRL1506_000877 | CRL681_001427                | MPL16_002310 | TL2766_001546 | WCFS1_000491 |
| OG0000391 | CRL1506_000878 | CRL681_001428                | MPL16_002311 | TL2766_001545 | WCFS1_000492 |
| OG0000392 | CRL1506_000879 | CRL681_001429                | MPL16_002312 | TL2766_001544 | WCFS1_000493 |
| OG0000400 | CRL1506_000886 | CRL681_001436                | MPL16_002314 | TL2766_001539 | WCFS1_000495 |
| OG0000393 | CRL1506_000887 | CRL681_001437                | MPL16_002315 | TL2766_001538 | WCFS1_000496 |
| OG0000394 | CRL1506_000888 | CRL681_001438                | MPL16_002316 | TL2766_001537 | WCFS1_000497 |
| OG0000395 | CRL1506_000889 | CRL681_001439                | MPL16_002317 | TL2766_001536 | WCFS1_000498 |
| OG0002973 |                | CRL681_001440                |              |               | WCFS1_000499 |
| OG0002974 |                | CRL681_001441                |              |               | WCFS1_000500 |
| OG0002975 |                | CRL681_001442                |              |               | WCFS1_000501 |
| OG0002976 |                | CRL681_001443                |              |               | WCFS1_000502 |
| OG0002977 |                | CRL681_001444                |              |               | WCFS1_000503 |
| OG0000396 | CRL1506_000890 | CRL681_001445                | MPL16_002318 | TL2766_001535 | WCFS1_000504 |
| OG0002978 |                | CRL681_001446                |              |               | WCFS1_000505 |
| OG0000397 | CRL1506_000891 | CRL681_001447                | MPL16_002319 | TL2766_001534 | WCFS1_000506 |
| OG0000398 | CRL1506_000892 | CRL681_001448                | MPL16_002320 | TL2766_001533 | WCFS1_000507 |
| OG0000399 | CRL1506_000893 | CRL681_001449                | MPL16_002321 | TL2766_001532 | WCFS1_000508 |
| OG0001647 | CRL1506_002696 | CRL681_001450                | MPL16_002322 | TL2766_001531 | WCFS1_000509 |
| OG0001646 | CRL1506_002695 | CRL681_001451                | MPL16_002323 | TL2766_001530 | WCFS1_000510 |
| OG0001645 | CRL1506_002694 | CRL681_001452                | MPL16_002324 | TL2766_001529 | WCFS1_000511 |
| OG0001644 | CRL1506_002693 | CRL681_001453                | MPL16_002325 | TL2766_001528 | WCFS1_000512 |

|           |                |               |                            |                              |                                          |
|-----------|----------------|---------------|----------------------------|------------------------------|------------------------------------------|
| OG0001643 | CRL1506_002692 | CRL681_001454 | MPL16_002326               | TL2766_001527                | WCFS1_000513                             |
| OG0001642 | CRL1506_002691 | CRL681_001455 | MPL16_002327               | TL2766_001526                | WCFS1_000514                             |
| OG0001641 | CRL1506_002690 | CRL681_001456 | MPL16_002328               | TL2766_001525                | WCFS1_000515                             |
| OG0002526 | CRL1506_002689 |               | MPL16_002329               | TL2766_001524                | WCFS1_000516                             |
| OG0001640 | CRL1506_002688 | CRL681_001458 | MPL16_002330               | TL2766_001523                | WCFS1_000517                             |
| OG0001639 | CRL1506_002687 | CRL681_001459 | MPL16_002331               | TL2766_001522                | WCFS1_000518                             |
| OG0001638 | CRL1506_002686 | CRL681_001460 | MPL16_002332               | TL2766_001521                | WCFS1_000519                             |
| OG0001637 | CRL1506_002685 | CRL681_001461 | MPL16_002333               | TL2766_001520                | WCFS1_000520                             |
| OG0001636 | CRL1506_002684 | CRL681_001462 | MPL16_002334               | TL2766_001519                | WCFS1_000521                             |
| OG0001635 | CRL1506_002683 | CRL681_001463 | MPL16_002335               | TL2766_001518                | WCFS1_000522                             |
| OG0001634 | CRL1506_002682 | CRL681_001464 | MPL16_002336               | TL2766_001517                | WCFS1_000523                             |
| OG0001633 | CRL1506_002681 | CRL681_001465 | MPL16_002337               | TL2766_001516                | WCFS1_000524                             |
| OG0000203 | CRL1506_002680 | CRL681_001466 | MPL16_000512, MPL16_002338 | TL2766_001515                | WCFS1_000525                             |
| OG0001632 | CRL1506_002679 | CRL681_001467 | MPL16_002339               | TL2766_001514                | WCFS1_000526                             |
| OG0001631 | CRL1506_002678 | CRL681_001468 | MPL16_002340               | TL2766_001513                | WCFS1_000527                             |
| OG0001630 | CRL1506_002677 | CRL681_001469 | MPL16_002341               | TL2766_001512                | WCFS1_000528                             |
| OG0001629 | CRL1506_002676 | CRL681_001470 | MPL16_001231               | TL2766_001511                | WCFS1_000529                             |
| OG0001628 | CRL1506_002675 | CRL681_001471 | MPL16_001232               | TL2766_001510                | WCFS1_000530                             |
| OG0001627 | CRL1506_002674 | CRL681_001472 | MPL16_000566               | TL2766_001509                | WCFS1_000531                             |
| OG0001626 | CRL1506_002673 | CRL681_001473 | MPL16_000565               | TL2766_001508                | WCFS1_000532                             |
| OG0001625 | CRL1506_002672 | CRL681_001474 | MPL16_000564               | TL2766_001507                | WCFS1_000533                             |
| OG0001624 | CRL1506_002670 | CRL681_001476 | MPL16_000562               | TL2766_001505                | WCFS1_000535                             |
| OG0001623 | CRL1506_002669 | CRL681_001477 | MPL16_000561               | TL2766_001504                | WCFS1_000536                             |
| OG0001622 | CRL1506_002668 | CRL681_001478 | MPL16_000560               | TL2766_001503                | WCFS1_000537                             |
| OG0001621 | CRL1506_002667 | CRL681_001479 | MPL16_000559               | TL2766_001502                | WCFS1_000538                             |
| OG0000201 | CRL1506_002620 |               | MPL16_002655               | TL2766_000997                | WCFS1_000539, WCFS1_002138, WCFS1_002852 |
| OG0002951 |                | CRL681_000212 |                            |                              | WCFS1_000541                             |
| OG0000246 |                | CRL681_000215 | MPL16_002885               | TL2766_000052, TL2766_001103 | WCFS1_000544, WCFS1_002110               |
| OG0002670 |                |               | MPL16_002881               | TL2766_000995                | WCFS1_000545, WCFS1_001704               |

|           |                                                                |                                             |                            |                              |                                                        |
|-----------|----------------------------------------------------------------|---------------------------------------------|----------------------------|------------------------------|--------------------------------------------------------|
| OG0000138 | CRL1506_001225                                                 | CRL681_001675                               | MPL16_001894               | TL2766_001307                | WCFS1_000546, WCFS1_000794                             |
| OG0002296 | CRL1506_000701                                                 | CRL681_000207                               |                            | TL2766_000064                | WCFS1_000547, WCFS1_002107                             |
| OG0000009 | CRL1506_000702, CRL1506_001224, CRL1506_002621, CRL1506_002935 | CRL681_000206, CRL681_000659, CRL681_001676 | MPL16_001893               | TL2766_000065, TL2766_001306 | WCFS1_000548, WCFS1_000795, WCFS1_002106, WCFS1_002851 |
| OG0002744 | CRL1506_000703                                                 |                                             |                            | TL2766_000066                | WCFS1_000549                                           |
| OG0002559 | CRL1506_002933                                                 | CRL681_000204                               |                            | TL2766_000067                | WCFS1_000550                                           |
| OG0001779 | CRL1506_002931, CRL1506_002932                                 | CRL681_000203                               |                            | TL2766_000068                | WCFS1_000551                                           |
| OG0002558 | CRL1506_002930                                                 | CRL681_000202                               |                            | TL2766_000069                | WCFS1_000552                                           |
| OG0002872 | CRL1506_002928                                                 |                                             |                            |                              | WCFS1_000553                                           |
| OG0002871 | CRL1506_002927                                                 |                                             |                            |                              | WCFS1_000554                                           |
| OG0003477 |                                                                |                                             |                            |                              | WCFS1_000555                                           |
| OG0002602 | CRL1506_000706                                                 |                                             | MPL16_002869               | TL2766_000073                | WCFS1_000556                                           |
| OG0002807 |                                                                |                                             | MPL16_002868               | TL2766_000074                | WCFS1_000557                                           |
| OG0002603 | CRL1506_000708                                                 |                                             | MPL16_002867               | TL2766_000075                | WCFS1_000558                                           |
| OG0000218 | CRL1506_002922                                                 | CRL681_000196                               | MPL16_002866               | TL2766_000077                | WCFS1_000559, WCFS1_002097                             |
| OG0002620 |                                                                | CRL681_000195                               |                            | TL2766_000078                | WCFS1_000560, WCFS1_002096                             |
| OG0002810 |                                                                |                                             |                            | TL2766_000079                | WCFS1_000561, WCFS1_002095                             |
| OG0000217 | CRL1506_002920                                                 | CRL681_000194                               | MPL16_002864               | TL2766_000080                | WCFS1_000562, WCFS1_002094                             |
| OG0002868 | CRL1506_002919                                                 |                                             |                            |                              | WCFS1_000563                                           |
| OG0002867 | CRL1506_002918                                                 |                                             |                            |                              | WCFS1_000564                                           |
| OG0002943 |                                                                | CRL681_000187                               |                            |                              | WCFS1_000565                                           |
| OG0003478 |                                                                |                                             |                            |                              | WCFS1_000566                                           |
| OG0000216 | CRL1506_002915                                                 | CRL681_000674                               | MPL16_001566, MPL16_002859 |                              | WCFS1_000567, WCFS1_002091                             |
| OG0002950 |                                                                | CRL681_000188                               |                            |                              | WCFS1_000568                                           |

|           |                                |               |                            |               |                            |
|-----------|--------------------------------|---------------|----------------------------|---------------|----------------------------|
| OG0002555 | CRL1506_002912                 | CRL681_000186 | MPL16_002857               |               | WCFS1_000569               |
| OG0000223 | CRL1506_002911                 | CRL681_000185 | MPL16_002856               | TL2766_000083 | WCFS1_000570, WCFS1_002087 |
| OG0002851 | CRL1506_002629                 |               |                            |               | WCFS1_000572               |
| OG0003049 |                                |               |                            | TL2766_000088 | WCFS1_000573               |
| OG0000096 | CRL1506_002827, CRL1506_002906 | CRL681_000181 | MPL16_002850               | TL2766_000089 | WCFS1_000574, WCFS1_002083 |
| OG0002729 | CRL1506_002826, CRL1506_002905 |               |                            |               | WCFS1_000575               |
| OG0002535 | CRL1506_002825, CRL1506_002904 |               |                            |               | WCFS1_000576, WCFS1_002081 |
| OG0002534 | CRL1506_002824                 | CRL681_002051 |                            |               | WCFS1_000577, WCFS1_002080 |
| OG0002728 | CRL1506_002823                 |               |                            |               | WCFS1_000578, WCFS1_002079 |
| OG0002727 | CRL1506_002822                 |               |                            |               | WCFS1_000579, WCFS1_002078 |
| OG0002726 | CRL1506_002821                 |               |                            |               | WCFS1_000580, WCFS1_002077 |
| OG0002731 | CRL1506_002820                 |               |                            |               | WCFS1_000581, WCFS1_002076 |
| OG0002725 | CRL1506_002819                 |               |                            |               | WCFS1_000582, WCFS1_002075 |
| OG0002724 | CRL1506_002818                 |               |                            |               | WCFS1_000583, WCFS1_002074 |
| OG0002723 | CRL1506_002817                 |               |                            |               | WCFS1_000584, WCFS1_002073 |
| OG0002722 | CRL1506_002816                 |               |                            |               | WCFS1_000585, WCFS1_002072 |
| OG0002721 | CRL1506_002815                 |               |                            |               | WCFS1_000586, WCFS1_002071 |
| OG0000061 | CRL1506_001877, CRL1506_002814 | CRL681_000696 | MPL16_001547, MPL16_002836 | TL2766_001062 | WCFS1_000587, WCFS1_002070 |
| OG0002856 | CRL1506_002813                 |               |                            |               | WCFS1_000588               |

|           |                                |                                             |                            |               |                            |
|-----------|--------------------------------|---------------------------------------------|----------------------------|---------------|----------------------------|
| OG0002855 | CRL1506_002812                 |                                             |                            |               | WCFS1_000589               |
| OG0002854 | CRL1506_002811                 |                                             |                            |               | WCFS1_000590               |
| OG0002853 | CRL1506_002810                 |                                             |                            |               | WCFS1_000591               |
| OG0002852 | CRL1506_002809                 |                                             |                            |               | WCFS1_000592               |
| OG0002720 | CRL1506_002808                 |                                             | MPL16_002829               |               | WCFS1_000593               |
| OG0002719 | CRL1506_002807                 |                                             | MPL16_002828               |               | WCFS1_000594               |
| OG0000059 | CRL1506_001868, CRL1506_002806 | CRL681_000705                               | MPL16_001540, MPL16_002827 | TL2766_000112 | WCFS1_000595, WCFS1_002063 |
| OG0002669 |                                |                                             | MPL16_002826               | TL2766_000113 | WCFS1_000596, WCFS1_002062 |
| OG0003479 |                                |                                             |                            |               | WCFS1_000598               |
| OG0002775 |                                | CRL681_000157                               |                            | TL2766_001055 | WCFS1_000599               |
| OG0003480 |                                |                                             |                            |               | WCFS1_000600               |
| OG0003481 |                                |                                             |                            |               | WCFS1_000601               |
| OG0001620 | CRL1506_002666                 | CRL681_001480                               | MPL16_000558               | TL2766_001500 | WCFS1_000602               |
| OG0002634 |                                | CRL681_001481                               | MPL16_000557               | TL2766_001499 | WCFS1_000603               |
| OG0001619 | CRL1506_002664                 | CRL681_001482                               | MPL16_000556               | TL2766_001498 | WCFS1_000604               |
| OG0001618 | CRL1506_002663                 | CRL681_001483                               | MPL16_000555               | TL2766_001497 | WCFS1_000605               |
| OG0000094 | CRL1506_002662                 | CRL681_001484, CRL681_002252, CRL681_002253 | MPL16_000554               | TL2766_001496 | WCFS1_000606               |
| OG0000202 | CRL1506_002661                 | CRL681_001485, CRL681_002254                | MPL16_000553               | TL2766_001495 | WCFS1_000607               |
| OG0001617 | CRL1506_002660                 | CRL681_001486                               | MPL16_000552               | TL2766_001494 | WCFS1_000608               |
| OG0001616 | CRL1506_002659                 | CRL681_001487                               | MPL16_000551               | TL2766_001493 | WCFS1_000609               |
| OG0001615 | CRL1506_002658                 | CRL681_001488                               | MPL16_000550               | TL2766_001492 | WCFS1_000610               |
| OG0001614 | CRL1506_002656                 | CRL681_001490                               | MPL16_000548               | TL2766_001490 | WCFS1_000612               |
| OG0001613 | CRL1506_002655                 | CRL681_001491                               | MPL16_000547               | TL2766_001489 | WCFS1_000613               |
| OG0001612 | CRL1506_002654                 | CRL681_001492                               | MPL16_000546               | TL2766_001488 | WCFS1_000614               |
| OG0001611 | CRL1506_002653                 | CRL681_001493                               | MPL16_000545               | TL2766_001487 | WCFS1_000615               |
| OG0001610 | CRL1506_002652                 | CRL681_001494                               | MPL16_000544               | TL2766_001481 | WCFS1_000616               |
| OG0001609 | CRL1506_002651                 | CRL681_001495                               | MPL16_000543               | TL2766_001480 | WCFS1_000617               |
| OG0001608 | CRL1506_002650                 | CRL681_001496                               | MPL16_000542               | TL2766_001479 | WCFS1_000618               |
| OG0001607 | CRL1506_002649                 | CRL681_001497                               | MPL16_000541               | TL2766_001478 | WCFS1_000619               |

|           |                                |                              |                            |                              |                            |
|-----------|--------------------------------|------------------------------|----------------------------|------------------------------|----------------------------|
| OG0001606 | CRL1506_002648                 | CRL681_001498                | MPL16_000540               | TL2766_001477                | WCFS1_000620               |
| OG0001605 | CRL1506_002647                 | CRL681_001499                | MPL16_000539               | TL2766_001476                | WCFS1_000621               |
| OG0000040 | CRL1506_002575, CRL1506_002646 | CRL681_001500, CRL681_003049 | MPL16_000273, MPL16_000538 | TL2766_001475, TL2766_001885 | WCFS1_000622, WCFS1_002926 |
| OG0001119 | CRL1506_001890                 | CRL681_001502                | MPL16_001720               | TL2766_001472                | WCFS1_000624               |
| OG0001120 | CRL1506_001891                 | CRL681_001503                | MPL16_001719               | TL2766_001471                | WCFS1_000625               |
| OG0001121 | CRL1506_001892                 | CRL681_001504                | MPL16_001718               | TL2766_001470                | WCFS1_000626               |
| OG0001122 | CRL1506_001893                 | CRL681_001505                | MPL16_001717               | TL2766_001469                | WCFS1_000627               |
| OG0001123 | CRL1506_001894                 | CRL681_001506                | MPL16_001716               | TL2766_001468                | WCFS1_000628               |
| OG0001124 | CRL1506_001895                 | CRL681_001507                | MPL16_001715               | TL2766_001467                | WCFS1_000629               |
| OG0001125 | CRL1506_001896                 | CRL681_001508                | MPL16_001714               | TL2766_001466                | WCFS1_000630               |
| OG0001126 | CRL1506_001897                 | CRL681_001509                | MPL16_001713               | TL2766_001465                | WCFS1_000631               |
| OG0001127 | CRL1506_001898                 | CRL681_001510                | MPL16_001712               | TL2766_001464                | WCFS1_000632               |
| OG0001128 | CRL1506_001899                 | CRL681_001511                | MPL16_001711               | TL2766_001463                | WCFS1_000633               |
| OG0001129 | CRL1506_001900                 | CRL681_001512                | MPL16_001710               | TL2766_001462                | WCFS1_000634               |
| OG0001130 | CRL1506_001901                 | CRL681_001513                | MPL16_001709               | TL2766_001461                | WCFS1_000635               |
| OG0001131 | CRL1506_001902                 | CRL681_001514                | MPL16_001708               | TL2766_001460                | WCFS1_000636               |
| OG0001132 | CRL1506_001903                 | CRL681_001515                | MPL16_001707               | TL2766_001459                | WCFS1_000637               |
| OG0001133 | CRL1506_001904                 | CRL681_001516                | MPL16_001706               | TL2766_001458                | WCFS1_000638               |
| OG0001134 | CRL1506_001905                 | CRL681_001517                | MPL16_001705               | TL2766_001457                | WCFS1_000639               |
| OG0001135 | CRL1506_001906                 | CRL681_001518                | MPL16_001704               | TL2766_001456                | WCFS1_000640               |
| OG0002434 | CRL1506_001907                 | CRL681_001519                |                            | TL2766_001455                | WCFS1_000641               |
| OG0001136 | CRL1506_001908                 | CRL681_001520                | MPL16_003221               | TL2766_001454                | WCFS1_000642               |
| OG0001137 | CRL1506_001909                 | CRL681_001521                | MPL16_000829               | TL2766_001453                | WCFS1_000643               |
| OG0001138 | CRL1506_001910                 | CRL681_001522                | MPL16_000830               | TL2766_001452                | WCFS1_000644               |
| OG0001139 | CRL1506_001911                 | CRL681_001523                | MPL16_000831               | TL2766_001451                | WCFS1_000645               |
| OG0001140 | CRL1506_001912                 | CRL681_001524                | MPL16_000832               | TL2766_001450                | WCFS1_000646               |
| OG0001141 | CRL1506_001913                 | CRL681_001525                | MPL16_000833               | TL2766_001449                | WCFS1_000647               |
| OG0001723 | CRL1506_001914                 | CRL681_001526                | MPL16_000834               | TL2766_001448                | WCFS1_000648               |
| OG0001142 | CRL1506_001915                 | CRL681_001527                | MPL16_000835               | TL2766_001447                | WCFS1_000649               |
| OG0001143 | CRL1506_001916                 | CRL681_001528                | MPL16_000836               | TL2766_001446                | WCFS1_000650               |
| OG0001144 | CRL1506_001917                 | CRL681_001529                | MPL16_000837               | TL2766_001445                | WCFS1_000651               |
| OG0001145 | CRL1506_001918                 | CRL681_001530                | MPL16_000838               | TL2766_001444                | WCFS1_000652               |
| OG0001146 | CRL1506_001919                 | CRL681_001531                | MPL16_000839               | TL2766_001443                | WCFS1_000653               |

|           |                                |                              |                            |                              |                                          |
|-----------|--------------------------------|------------------------------|----------------------------|------------------------------|------------------------------------------|
| OG0001147 | CRL1506_001920                 | CRL681_001532                | MPL16_000840               | TL2766_001442                | WCFS1_000654                             |
| OG0001148 | CRL1506_001921                 | CRL681_001533                | MPL16_000841               | TL2766_001441                | WCFS1_000655                             |
| OG0001149 | CRL1506_001922                 | CRL681_001534                | MPL16_000842               | TL2766_001440                | WCFS1_000656                             |
| OG0001150 | CRL1506_001923                 | CRL681_001535                | MPL16_000843               | TL2766_001439                | WCFS1_000657                             |
| OG0000166 | CRL1506_001924                 | CRL681_001536                | MPL16_000844, MPL16_001119 | TL2766_001438                | WCFS1_000658                             |
| OG0001151 | CRL1506_001925                 | CRL681_001537                | MPL16_000845               | TL2766_001437                | WCFS1_000659                             |
| OG0001152 | CRL1506_001926                 | CRL681_001538                | MPL16_000846               | TL2766_001436                | WCFS1_000660                             |
| OG0001153 | CRL1506_001927                 | CRL681_001539                | MPL16_000847               | TL2766_001435                | WCFS1_000661                             |
| OG0000015 | CRL1506_000995, CRL1506_001928 | CRL681_001118, CRL681_001540 | MPL16_000170, MPL16_000848 | TL2766_001434, TL2766_002776 | WCFS1_000662, WCFS1_001656, WCFS1_003127 |
| OG0001154 | CRL1506_001935                 | CRL681_001547                | MPL16_000849               | TL2766_001433                | WCFS1_000663                             |
| OG0001155 | CRL1506_001936                 | CRL681_001548                | MPL16_000850               | TL2766_001432                | WCFS1_000664                             |
| OG0001156 | CRL1506_001937                 | CRL681_001549                | MPL16_000851               | TL2766_001431                | WCFS1_000665                             |
| OG0001157 | CRL1506_001938                 | CRL681_001550                | MPL16_000852               | TL2766_001430                | WCFS1_000666                             |
| OG0001158 | CRL1506_001939                 | CRL681_001551                | MPL16_000853               | TL2766_001429                | WCFS1_000667                             |
| OG0001159 | CRL1506_001940                 | CRL681_001552                | MPL16_000854               | TL2766_001428                | WCFS1_000668                             |
| OG0001160 | CRL1506_001941                 | CRL681_001553                | MPL16_000855               | TL2766_001427                | WCFS1_000669                             |
| OG0000167 | CRL1506_001942                 | CRL681_001554                | MPL16_000856, MPL16_003115 | TL2766_001426                | WCFS1_000670                             |
| OG0001161 | CRL1506_001943                 | CRL681_001555                | MPL16_000857               | TL2766_001425                | WCFS1_000671                             |
| OG0001162 | CRL1506_001944                 | CRL681_001556                | MPL16_000858               | TL2766_001424                | WCFS1_000672                             |
| OG0001163 | CRL1506_001945                 | CRL681_001557                | MPL16_000859               | TL2766_001423                | WCFS1_000673                             |
| OG0001164 | CRL1506_001946                 | CRL681_001558                | MPL16_000860               | TL2766_001422                | WCFS1_000674                             |
| OG0001165 | CRL1506_001947                 | CRL681_001559                | MPL16_000861               | TL2766_001421                | WCFS1_000675                             |
| OG0001166 | CRL1506_001948                 | CRL681_001560                | MPL16_000862               | TL2766_001420                | WCFS1_000676                             |
| OG0001167 | CRL1506_001949                 | CRL681_001561                | MPL16_000863               | TL2766_001419                | WCFS1_000677                             |
| OG0001168 | CRL1506_001950                 | CRL681_001562                | MPL16_000864               | TL2766_001418                | WCFS1_000678                             |
| OG0001169 | CRL1506_001951                 | CRL681_001563                | MPL16_000865               | TL2766_001417                | WCFS1_000679                             |
| OG0001170 | CRL1506_001952                 | CRL681_001564                | MPL16_000866               | TL2766_001416                | WCFS1_000680                             |
| OG0001171 | CRL1506_001953                 | CRL681_001565                | MPL16_000867               | TL2766_001415                | WCFS1_000681                             |
| OG0000168 | CRL1506_001954                 | CRL681_001566                | MPL16_000259, MPL16_000868 | TL2766_001414                | WCFS1_000682                             |



|           |                                |                              |                            |                              |                            |
|-----------|--------------------------------|------------------------------|----------------------------|------------------------------|----------------------------|
| OG0001172 | CRL1506_001955                 | CRL681_001567                | MPL16_000869               | TL2766_001413                | WCFS1_000683               |
| OG0001173 | CRL1506_001957                 | CRL681_001569                | MPL16_000871               | TL2766_001411                | WCFS1_000685               |
| OG0001174 | CRL1506_001958                 | CRL681_001570                | MPL16_000872               | TL2766_001410                | WCFS1_000686               |
| OG0000085 | CRL1506_001959                 | CRL681_001571, CRL681_002226 | MPL16_000513, MPL16_000873 | TL2766_001409                | WCFS1_000687               |
| OG0001175 | CRL1506_001960                 | CRL681_001572                | MPL16_000874               | TL2766_001408                | WCFS1_000688               |
| OG0001176 | CRL1506_001961                 | CRL681_001573                | MPL16_000875               | TL2766_001407                | WCFS1_000689               |
| OG0001177 | CRL1506_001962                 | CRL681_001574                | MPL16_000876               | TL2766_001406                | WCFS1_000690               |
| OG0001178 | CRL1506_001963                 | CRL681_001575                | MPL16_000877               | TL2766_001405                | WCFS1_000691               |
| OG0001179 | CRL1506_001964                 | CRL681_001576                | MPL16_000878               | TL2766_001404                | WCFS1_000692               |
| OG0001180 | CRL1506_001965                 | CRL681_001577                | MPL16_000879               | TL2766_001403                | WCFS1_000693               |
| OG0001181 | CRL1506_001966                 | CRL681_001578                | MPL16_000880               | TL2766_001402                | WCFS1_000694               |
| OG0001182 | CRL1506_001967                 | CRL681_001579                | MPL16_000881               | TL2766_001401                | WCFS1_000695               |
| OG0001183 | CRL1506_001968                 | CRL681_001580                | MPL16_000882               | TL2766_001400                | WCFS1_000696               |
| OG0002435 | CRL1506_001969                 |                              | MPL16_001407               | TL2766_001399                | WCFS1_000697               |
| OG0001184 | CRL1506_001970                 | CRL681_001582                | MPL16_000883               | TL2766_001398                | WCFS1_000698               |
| OG0000029 | CRL1506_001404, CRL1506_001971 | CRL681_000989, CRL681_001583 | MPL16_000027, MPL16_000884 | TL2766_001134, TL2766_001397 | WCFS1_000699, WCFS1_001801 |
| OG0001185 | CRL1506_001972                 | CRL681_001584                | MPL16_000885               | TL2766_001396                | WCFS1_000700               |
| OG0001186 | CRL1506_001973                 | CRL681_001585                | MPL16_000886               | TL2766_001395                | WCFS1_000701               |
| OG0001187 | CRL1506_001974                 | CRL681_001586                | MPL16_000887               | TL2766_001394                | WCFS1_000702               |
| OG0001188 | CRL1506_001975                 | CRL681_001587                | MPL16_000888               | TL2766_001393                | WCFS1_000703               |
| OG0001189 | CRL1506_001976                 | CRL681_001588                | MPL16_000889               | TL2766_001392                | WCFS1_000704               |
| OG0001190 | CRL1506_001977                 | CRL681_001589                | MPL16_000890               | TL2766_001391                | WCFS1_000705               |
| OG0001191 | CRL1506_001978                 | CRL681_001590                | MPL16_000891               | TL2766_001390                | WCFS1_000706               |
| OG0001192 | CRL1506_001979                 | CRL681_001591                | MPL16_000892               | TL2766_001389                | WCFS1_000707               |
| OG0001193 | CRL1506_001980                 | CRL681_001592                | MPL16_000361               | TL2766_001388                | WCFS1_000708               |
| OG0001194 | CRL1506_001981                 | CRL681_001593                | MPL16_000362               | TL2766_001387                | WCFS1_000709               |
| OG0001195 | CRL1506_001982                 | CRL681_001594                | MPL16_000363               | TL2766_001386                | WCFS1_000710               |
| OG0001196 | CRL1506_001983                 | CRL681_001595                | MPL16_000364               | TL2766_001385                | WCFS1_000711               |
| OG0001197 | CRL1506_001984                 | CRL681_001596                | MPL16_000365               | TL2766_001384                | WCFS1_000712               |
| OG0001198 | CRL1506_001985                 | CRL681_001597                | MPL16_000366               | TL2766_001383                | WCFS1_000713               |
| OG0001199 | CRL1506_001986                 | CRL681_001598                | MPL16_000367               | TL2766_001382                | WCFS1_000714               |
| OG0001200 | CRL1506_001987                 | CRL681_001599                | MPL16_000368               | TL2766_001381                | WCFS1_000715               |

|           |                                |               |                            |               |                            |
|-----------|--------------------------------|---------------|----------------------------|---------------|----------------------------|
| OG0001201 | CRL1506_001988                 | CRL681_001600 | MPL16_002534               | TL2766_001380 | WCFS1_000716               |
| OG0001202 | CRL1506_001989                 | CRL681_001601 | MPL16_002533               | TL2766_001379 | WCFS1_000717               |
| OG0001203 | CRL1506_001990                 | CRL681_001602 | MPL16_002532               | TL2766_001378 | WCFS1_000718               |
| OG0000706 | CRL1506_001301                 | CRL681_001603 | MPL16_002531               | TL2766_001377 | WCFS1_000719               |
| OG0000145 | CRL1506_001300                 | CRL681_001604 | MPL16_000282, MPL16_002530 | TL2766_001376 | WCFS1_000720               |
| OG0000705 | CRL1506_001299                 | CRL681_001605 | MPL16_002529               | TL2766_001375 | WCFS1_000721               |
| OG0002379 | CRL1506_001298                 | CRL681_001606 |                            | TL2766_001374 | WCFS1_000722               |
| OG0002378 | CRL1506_001297                 | CRL681_001607 |                            | TL2766_001373 | WCFS1_000723               |
| OG0002687 | CRL1506_001296                 | CRL681_001608 |                            |               | WCFS1_000724               |
| OG0002678 | CRL1506_001295                 | CRL681_001609 |                            |               | WCFS1_000725               |
| OG0000704 | CRL1506_001293                 | CRL681_001611 | MPL16_002165               | TL2766_001370 | WCFS1_000727               |
| OG0000703 | CRL1506_001291                 | CRL681_001613 | MPL16_002163               | TL2766_001368 | WCFS1_000729               |
| OG0000702 | CRL1506_001290                 | CRL681_001614 | MPL16_002162               | TL2766_001367 | WCFS1_000730               |
| OG0000701 | CRL1506_001289                 | CRL681_001615 | MPL16_002161               | TL2766_001366 | WCFS1_000731               |
| OG0000700 | CRL1506_001288                 | CRL681_001616 | MPL16_002160               | TL2766_001365 | WCFS1_000732               |
| OG0000699 | CRL1506_001287                 | CRL681_001617 | MPL16_002159               | TL2766_001364 | WCFS1_000733               |
| OG0000698 | CRL1506_001286                 | CRL681_001618 | MPL16_002158               | TL2766_001363 | WCFS1_000734               |
| OG0000697 | CRL1506_001285                 | CRL681_001619 | MPL16_002157               | TL2766_001362 | WCFS1_000735               |
| OG0000696 | CRL1506_001284                 | CRL681_001620 | MPL16_002156               | TL2766_001361 | WCFS1_000736               |
| OG0001019 | CRL1506_001283                 | CRL681_001621 | MPL16_002155               | TL2766_001360 | WCFS1_000737               |
| OG0000695 | CRL1506_001282                 | CRL681_001622 | MPL16_002154               | TL2766_001359 | WCFS1_000738               |
| OG0000694 | CRL1506_001281                 | CRL681_001623 | MPL16_002153               | TL2766_001358 | WCFS1_000739               |
| OG0000693 | CRL1506_001280                 | CRL681_001624 | MPL16_002152               | TL2766_001357 | WCFS1_000740               |
| OG0002377 | CRL1506_001279                 | CRL681_001625 |                            | TL2766_001356 | WCFS1_000741               |
| OG0000692 | CRL1506_001278                 | CRL681_001626 | MPL16_002150               | TL2766_001355 | WCFS1_000742               |
| OG0000073 | CRL1506_000096, CRL1506_001277 | CRL681_001627 | MPL16_002149               | TL2766_001354 | WCFS1_000743, WCFS1_002477 |
| OG0000691 | CRL1506_001276                 | CRL681_001628 | MPL16_002353               | TL2766_001353 | WCFS1_000744               |
| OG0000690 | CRL1506_001275                 | CRL681_001629 | MPL16_002354               | TL2766_001352 | WCFS1_000745               |
| OG0000689 | CRL1506_001274                 | CRL681_001630 | MPL16_002355               | TL2766_001351 | WCFS1_000746               |
| OG0000688 | CRL1506_001273                 | CRL681_001631 | MPL16_002356               | TL2766_001350 | WCFS1_000747               |
| OG0000687 | CRL1506_001272                 | CRL681_001632 | MPL16_002357               | TL2766_001349 | WCFS1_000748               |
| OG0000686 | CRL1506_001271                 | CRL681_001633 | MPL16_002358               | TL2766_001348 | WCFS1_000749               |

|           |                                |                              |                            |                              |                            |
|-----------|--------------------------------|------------------------------|----------------------------|------------------------------|----------------------------|
| OG0000027 | CRL1506_001270, CRL1506_002979 | CRL681_001634, CRL681_002175 | MPL16_000771, MPL16_002359 | TL2766_001347, TL2766_003027 | WCFS1_000750, WCFS1_001414 |
| OG0000685 | CRL1506_001269                 | CRL681_001635                | MPL16_002360               | TL2766_001346                | WCFS1_000751               |
| OG0000684 | CRL1506_001268                 | CRL681_001636                | MPL16_002361               | TL2766_001345                | WCFS1_000752               |
| OG0000683 | CRL1506_001267                 | CRL681_001637                | MPL16_002362               | TL2766_001344                | WCFS1_000753               |
| OG0000682 | CRL1506_001266                 | CRL681_001638                | MPL16_002363               | TL2766_001343                | WCFS1_000754               |
| OG0000681 | CRL1506_001265                 | CRL681_001639                | MPL16_002364               | TL2766_001342                | WCFS1_000755               |
| OG0000144 | CRL1506_001264                 | CRL681_001640, CRL681_003196 | MPL16_002365               | TL2766_001341                | WCFS1_000756               |
| OG0000680 | CRL1506_001263                 | CRL681_001641                | MPL16_002366               | TL2766_001340                | WCFS1_000757               |
| OG0000679 | CRL1506_001262                 | CRL681_001642                | MPL16_002367               | TL2766_001339                | WCFS1_000758               |
| OG0000158 | CRL1506_001258                 | CRL681_001647                | MPL16_000511, MPL16_002371 | TL2766_001335                | WCFS1_000762               |
| OG0000143 | CRL1506_001257                 | CRL681_001648                | MPL16_000510, MPL16_002372 | TL2766_001334                | WCFS1_000763               |
| OG0000142 | CRL1506_001256                 | CRL681_001649                | MPL16_000509, MPL16_002373 | TL2766_001333                | WCFS1_000764               |
| OG0000141 | CRL1506_001255                 | CRL681_001650                | MPL16_000508, MPL16_002374 | TL2766_001332                | WCFS1_000765               |
| OG0000678 | CRL1506_001254                 | CRL681_001651                | MPL16_002375               | TL2766_001331                | WCFS1_000766               |
| OG0001018 | CRL1506_001253                 | CRL681_001652                | MPL16_002376               | TL2766_001330                | WCFS1_000767               |
| OG0000677 | CRL1506_001252                 | CRL681_001653                | MPL16_002377               | TL2766_001329                | WCFS1_000768               |
| OG0000676 | CRL1506_001251                 | CRL681_001654                | MPL16_002378               | TL2766_001328                | WCFS1_000769               |
| OG0002374 | CRL1506_001250                 | CRL681_001655                |                            | TL2766_001327                | WCFS1_000770               |
| OG0000675 | CRL1506_001249                 | CRL681_001656                | MPL16_002380               | TL2766_001326                | WCFS1_000771               |
| OG0000674 | CRL1506_001248                 | CRL681_001657                | MPL16_002381               | TL2766_001325                | WCFS1_000772               |
| OG0000673 | CRL1506_001247                 | CRL681_001658                | MPL16_002382               | TL2766_001324                | WCFS1_000773               |
| OG0000672 | CRL1506_001246                 | CRL681_001659                | MPL16_002383               | TL2766_001323                | WCFS1_000774               |
| OG0001017 | CRL1506_001245                 | CRL681_001660                | MPL16_002384               | TL2766_001322                | WCFS1_000775               |
| OG0000671 | CRL1506_001244                 | CRL681_001661                | MPL16_003227               | TL2766_001321                | WCFS1_000776               |
| OG0000670 | CRL1506_001243                 | CRL681_001662                | MPL16_001907               | TL2766_001320                | WCFS1_000777               |
| OG0000669 | CRL1506_001242                 | CRL681_001663                | MPL16_001906               | TL2766_001319                | WCFS1_000778               |
| OG0000668 | CRL1506_001241                 | CRL681_001664                | MPL16_001905               | TL2766_001318                | WCFS1_000779               |
| OG0000667 | CRL1506_001240                 | CRL681_001665                | MPL16_001904               | TL2766_001317                | WCFS1_000780               |

|           |                                |                              |                            |                              |                                                        |
|-----------|--------------------------------|------------------------------|----------------------------|------------------------------|--------------------------------------------------------|
| OG0000666 | CRL1506_001239                 | CRL681_001666                | MPL16_001903               | TL2766_001316                | WCFS1_000781                                           |
| OG0000140 | CRL1506_001238                 | CRL681_001667                | MPL16_001845, MPL16_001902 | TL2766_001315                | WCFS1_000782                                           |
| OG0000665 | CRL1506_001237                 | CRL681_001668                | MPL16_001901               | TL2766_001314                | WCFS1_000783                                           |
| OG0000664 | CRL1506_001236                 | CRL681_001669                | MPL16_001900               | TL2766_001313                | WCFS1_000784                                           |
| OG0000197 | CRL1506_002544                 | CRL681_003018                |                            | TL2766_001854                | WCFS1_000785, WCFS1_002650, WCFS1_002958               |
| OG0002666 |                                |                              | MPL16_001771               |                              | WCFS1_000786, WCFS1_002652, WCFS1_002725               |
| OG0000018 | CRL1506_002542, CRL1506_002546 | CRL681_003007, CRL681_003020 | MPL16_002621               | TL2766_001843, TL2766_001856 | WCFS1_000787, WCFS1_002651, WCFS1_002956, WCFS1_002969 |
| OG0000663 | CRL1506_001235                 | CRL681_001670                | MPL16_001899               | TL2766_001312                | WCFS1_000788                                           |
| OG0000662 | CRL1506_001234                 | CRL681_001671                | MPL16_001898               | TL2766_001311                | WCFS1_000789                                           |
| OG0000139 | CRL1506_001233                 | CRL681_001672                | MPL16_000383, MPL16_001897 | TL2766_001310                | WCFS1_000791                                           |
| OG0000661 | CRL1506_001232                 | CRL681_001673                | MPL16_001896               | TL2766_001309                | WCFS1_000792                                           |
| OG0000660 | CRL1506_001231                 | CRL681_001674                | MPL16_001895               | TL2766_001308                | WCFS1_000793                                           |
| OG0002795 |                                | CRL681_001677                |                            | TL2766_001305                | WCFS1_000796                                           |
| OG0000659 | CRL1506_001223                 | CRL681_001678                | MPL16_001892               | TL2766_001304                | WCFS1_000797                                           |
| OG0000658 | CRL1506_001222                 |                              | MPL16_001891               | TL2766_001303                | WCFS1_000798, WCFS1_001162                             |
| OG0002373 | CRL1506_001221                 |                              | MPL16_001890               | TL2766_001302                | WCFS1_000799                                           |
| OG0000657 | CRL1506_001220                 | CRL681_001679                | MPL16_001889               | TL2766_001301                | WCFS1_000800                                           |
| OG0000656 | CRL1506_001219                 | CRL681_001685                | MPL16_001883               | TL2766_001300                | WCFS1_000801                                           |
| OG0000655 | CRL1506_001218                 | CRL681_001686                | MPL16_001882               | TL2766_001299                | WCFS1_000802                                           |
| OG0000654 | CRL1506_001217                 | CRL681_001687                | MPL16_001881               | TL2766_001298                | WCFS1_000803                                           |
| OG0000653 | CRL1506_001216                 | CRL681_001688                | MPL16_001880               | TL2766_001297                | WCFS1_000804                                           |
| OG0000652 | CRL1506_001215                 | CRL681_001689                | MPL16_001879               | TL2766_001296                | WCFS1_000805                                           |
| OG0000651 | CRL1506_001214                 | CRL681_001690                | MPL16_001878               | TL2766_001295                | WCFS1_000806                                           |
| OG0000650 | CRL1506_001213                 | CRL681_001691                | MPL16_001877               | TL2766_001294                | WCFS1_000807                                           |

|           |                                |                                             |                            |                                             |                                          |
|-----------|--------------------------------|---------------------------------------------|----------------------------|---------------------------------------------|------------------------------------------|
| OG0000649 | CRL1506_001212                 | CRL681_001692                               | MPL16_001876               | TL2766_001293                               | WCFS1_000808                             |
| OG0000648 | CRL1506_001211                 | CRL681_001693                               | MPL16_001683               | TL2766_001292                               | WCFS1_000809                             |
| OG0000647 | CRL1506_001210                 | CRL681_001694                               | MPL16_001682               | TL2766_001291                               | WCFS1_000810                             |
| OG0000646 | CRL1506_001209                 | CRL681_001695                               | MPL16_001681               | TL2766_001290                               | WCFS1_000811                             |
| OG0000645 | CRL1506_001208                 | CRL681_001696                               | MPL16_001680               | TL2766_001289                               | WCFS1_000812                             |
| OG0002635 |                                | CRL681_001697                               | MPL16_000326               | TL2766_001288                               | WCFS1_000813                             |
| OG0002636 |                                | CRL681_001698                               | MPL16_000408               | TL2766_001287                               | WCFS1_000814                             |
| OG0000046 |                                | CRL681_001699, CRL681_001701, CRL681_001702 | MPL16_000407               | TL2766_001283, TL2766_001284, TL2766_001286 | WCFS1_000815, WCFS1_000817, WCFS1_000818 |
| OG0000113 |                                | CRL681_000652, CRL681_001700, CRL681_001920 | MPL16_001591               | TL2766_001106, TL2766_001285                | WCFS1_000816                             |
| OG0000644 | CRL1506_001205                 |                                             | MPL16_001991, MPL16_001992 | TL2766_001282                               | WCFS1_000819                             |
| OG0002372 | CRL1506_001204                 |                                             | MPL16_001990               | TL2766_001281                               | WCFS1_000820                             |
| OG0000643 | CRL1506_001203                 | CRL681_001705                               | MPL16_001989               | TL2766_001280                               | WCFS1_000821                             |
| OG0002371 | CRL1506_001202                 | CRL681_001706                               |                            | TL2766_001279                               | WCFS1_000822                             |
| OG0000642 | CRL1506_001201                 | CRL681_001707                               | MPL16_001987               | TL2766_001278                               | WCFS1_000823                             |
| OG0000137 | CRL1506_001200, CRL1506_001840 | CRL681_001708                               | MPL16_001986               | TL2766_001277                               | WCFS1_000824                             |
| OG0000136 | CRL1506_001199                 | CRL681_000575, CRL681_001709                | MPL16_001985               | TL2766_001276                               | WCFS1_000825                             |
| OG0000135 | CRL1506_001198                 | CRL681_000576, CRL681_001710                | MPL16_001984               | TL2766_001275                               | WCFS1_000826                             |
| OG0000641 | CRL1506_001197                 | CRL681_001711                               | MPL16_001983               | TL2766_001274                               | WCFS1_000827                             |
| OG0000640 | CRL1506_001196                 | CRL681_001712                               | MPL16_001982               | TL2766_001273                               | WCFS1_000828                             |
| OG0000025 | CRL1506_001195, CRL1506_002755 | CRL681_001267, CRL681_001713                | MPL16_001981, MPL16_003047 | TL2766_001272, TL2766_003099                | WCFS1_000829, WCFS1_001492               |
| OG0000639 | CRL1506_001194                 | CRL681_001714                               | MPL16_001980               | TL2766_001271                               | WCFS1_000830                             |
| OG0000638 | CRL1506_001193                 | CRL681_001715                               | MPL16_001979               | TL2766_001270                               | WCFS1_000831                             |
| OG0000637 | CRL1506_001192                 | CRL681_001716                               | MPL16_001978               | TL2766_001269                               | WCFS1_000832                             |
| OG0002370 | CRL1506_001191                 | CRL681_001717                               | MPL16_001977               |                                             | WCFS1_000833                             |
| OG0000636 | CRL1506_001190                 | CRL681_001718                               | MPL16_001976               | TL2766_001268                               | WCFS1_000834                             |

|           |                                |                              |                            |                              |                            |
|-----------|--------------------------------|------------------------------|----------------------------|------------------------------|----------------------------|
| OG0000635 | CRL1506_001189                 | CRL681_001719                | MPL16_001975               | TL2766_001267                | WCFS1_000835               |
| OG0000634 | CRL1506_001188                 | CRL681_001720                | MPL16_001974               | TL2766_001266                | WCFS1_000836               |
| OG0000633 | CRL1506_001187                 | CRL681_001721                | MPL16_001973               | TL2766_001265                | WCFS1_000837               |
| OG0000134 | CRL1506_001186                 | CRL681_001722                | MPL16_001972               | TL2766_000578, TL2766_001264 | WCFS1_000838               |
| OG0000133 | CRL1506_001185                 | CRL681_001723                | MPL16_001971               | TL2766_000579, TL2766_001263 | WCFS1_000839               |
| OG0000632 | CRL1506_001184                 | CRL681_001724                | MPL16_001970               | TL2766_000580                | WCFS1_000840               |
| OG0000631 | CRL1506_001183                 | CRL681_001725                | MPL16_001969               | TL2766_000581                | WCFS1_000841               |
| OG0001016 | CRL1506_001182                 | CRL681_001726                | MPL16_001968               | TL2766_000582                | WCFS1_000842               |
| OG0000630 | CRL1506_001181                 | CRL681_001727                | MPL16_001967               | TL2766_000583                | WCFS1_000843               |
| OG0002637 |                                | CRL681_001728                | MPL16_001966               | TL2766_000584                | WCFS1_000844               |
| OG0000132 | CRL1506_001179                 | CRL681_001729                | MPL16_000187, MPL16_001965 | TL2766_000585                | WCFS1_000845               |
| OG0000629 | CRL1506_001178                 | CRL681_001730                | MPL16_001964               | TL2766_000586                | WCFS1_000846               |
| OG0000628 | CRL1506_001177                 | CRL681_001731                | MPL16_001963               | TL2766_000587                | WCFS1_000847               |
| OG0000627 | CRL1506_001176                 | CRL681_001732                | MPL16_001962               | TL2766_000588                | WCFS1_000848               |
| OG0000050 | CRL1506_001175, CRL1506_002866 | CRL681_001733, CRL681_002476 | MPL16_001961               | TL2766_000589, TL2766_002206 | WCFS1_000849, WCFS1_002610 |
| OG0000626 | CRL1506_001174                 | CRL681_001734                | MPL16_001960               | TL2766_000590                | WCFS1_000850               |
| OG0000625 | CRL1506_001173                 | CRL681_001735                | MPL16_001959               | TL2766_000591                | WCFS1_000851               |
| OG0000624 | CRL1506_001172                 | CRL681_001736                | MPL16_001958               | TL2766_000592                | WCFS1_000852               |
| OG0000623 | CRL1506_001171                 | CRL681_001906                | MPL16_001957               | TL2766_000593                | WCFS1_000853               |
| OG0000622 | CRL1506_001170                 | CRL681_001738                | MPL16_001956               | TL2766_000594                | WCFS1_000854               |
| OG0000131 | CRL1506_001169                 | CRL681_001739                | MPL16_001280, MPL16_001955 | TL2766_000595                | WCFS1_000855               |
| OG0000621 | CRL1506_001168                 | CRL681_001740                | MPL16_001954               | TL2766_000596                | WCFS1_000856               |
| OG0000620 | CRL1506_001167                 | CRL681_001741                | MPL16_001953               | TL2766_000597                | WCFS1_000857               |
| OG0000619 | CRL1506_001166                 | CRL681_001742                | MPL16_001952               | TL2766_000598                | WCFS1_000858               |
| OG0000618 | CRL1506_001164                 | CRL681_001744                | MPL16_001950               | TL2766_000600                | WCFS1_000860               |
| OG0000617 | CRL1506_001163                 | CRL681_001745                | MPL16_001949               | TL2766_000601                | WCFS1_000861               |
| OG0000616 | CRL1506_001162                 | CRL681_001746                | MPL16_001948               | TL2766_000602                | WCFS1_000862               |
| OG0001015 | CRL1506_001161                 | CRL681_001747                | MPL16_001947               | TL2766_000603                | WCFS1_000863               |
| OG0000615 | CRL1506_001160                 | CRL681_001748                | MPL16_001946               | TL2766_000604                | WCFS1_000864               |

|           |                |               |              |               |              |
|-----------|----------------|---------------|--------------|---------------|--------------|
| OG0000614 | CRL1506_001159 | CRL681_001749 | MPL16_001945 | TL2766_000605 | WCFS1_000865 |
| OG0000613 | CRL1506_001158 | CRL681_001750 | MPL16_001944 | TL2766_000606 | WCFS1_000866 |
| OG0000612 | CRL1506_001157 | CRL681_001751 | MPL16_001943 | TL2766_000607 | WCFS1_000867 |
| OG0000611 | CRL1506_001156 | CRL681_001752 | MPL16_001942 | TL2766_000608 | WCFS1_000868 |
| OG0000610 | CRL1506_001155 | CRL681_001754 | MPL16_001941 | TL2766_000609 | WCFS1_000869 |
| OG0000609 | CRL1506_001154 | CRL681_001755 | MPL16_001940 | TL2766_000610 | WCFS1_000870 |
| OG0000608 | CRL1506_001153 | CRL681_001756 | MPL16_001939 | TL2766_000611 | WCFS1_000871 |
| OG0000607 | CRL1506_001145 | CRL681_001764 | MPL16_001931 | TL2766_000619 | WCFS1_000879 |
| OG0000606 | CRL1506_001144 | CRL681_001765 | MPL16_001930 | TL2766_000620 | WCFS1_000880 |
| OG0000605 | CRL1506_001143 | CRL681_001766 | MPL16_001929 | TL2766_000621 | WCFS1_000881 |
| OG0000604 | CRL1506_001142 | CRL681_001767 | MPL16_001928 | TL2766_000622 | WCFS1_000882 |
| OG0000603 | CRL1506_001141 | CRL681_001768 | MPL16_001927 | TL2766_000623 | WCFS1_000883 |
| OG0000602 | CRL1506_001140 | CRL681_001769 | MPL16_001926 | TL2766_000624 | WCFS1_000884 |
| OG0000601 | CRL1506_001139 | CRL681_001770 | MPL16_001925 | TL2766_000625 | WCFS1_000885 |
| OG0000600 | CRL1506_001138 | CRL681_001771 | MPL16_001924 | TL2766_000626 | WCFS1_000886 |
| OG0000599 | CRL1506_001137 | CRL681_001772 | MPL16_001923 | TL2766_000627 | WCFS1_000887 |
| OG0000598 | CRL1506_001136 | CRL681_001773 | MPL16_001350 | TL2766_000628 | WCFS1_000888 |
| OG0000597 | CRL1506_001135 | CRL681_001774 | MPL16_001351 | TL2766_000629 | WCFS1_000889 |
| OG0000596 | CRL1506_001134 | CRL681_001775 | MPL16_001352 | TL2766_000630 | WCFS1_000890 |
| OG0000595 | CRL1506_001133 | CRL681_001776 | MPL16_001353 | TL2766_000631 | WCFS1_000891 |
| OG0000594 | CRL1506_001132 | CRL681_001777 | MPL16_001354 | TL2766_000632 | WCFS1_000892 |
| OG0000593 | CRL1506_001131 | CRL681_001778 | MPL16_001355 | TL2766_000633 | WCFS1_000893 |
| OG0000592 | CRL1506_001130 | CRL681_001779 | MPL16_001356 | TL2766_000634 | WCFS1_000894 |
| OG0000591 | CRL1506_001129 | CRL681_001780 | MPL16_001357 | TL2766_000635 | WCFS1_000895 |
| OG0000590 | CRL1506_001128 | CRL681_001781 | MPL16_001358 | TL2766_000636 | WCFS1_000896 |
| OG0000589 | CRL1506_001127 | CRL681_001782 | MPL16_001359 | TL2766_000637 | WCFS1_000897 |
| OG0000588 | CRL1506_001126 | CRL681_001783 | MPL16_001360 | TL2766_000638 | WCFS1_000898 |
| OG0000587 | CRL1506_001125 | CRL681_001784 | MPL16_001361 | TL2766_000639 | WCFS1_000899 |
| OG0000586 | CRL1506_001124 | CRL681_001785 | MPL16_001362 | TL2766_000640 | WCFS1_000900 |
| OG0000585 | CRL1506_001123 | CRL681_001786 | MPL16_001363 | TL2766_000641 | WCFS1_000901 |
| OG0000584 | CRL1506_001122 | CRL681_001787 | MPL16_001364 | TL2766_000642 | WCFS1_000902 |
| OG0000583 | CRL1506_001121 | CRL681_001788 | MPL16_001365 | TL2766_000643 | WCFS1_000903 |
| OG0000582 | CRL1506_001120 | CRL681_001789 | MPL16_001366 | TL2766_000644 | WCFS1_000904 |
| OG0000581 | CRL1506_001119 | CRL681_001790 | MPL16_001367 | TL2766_000645 | WCFS1_000905 |

|           |                                                                                                                                                                |               |              |                                                                           |                                                                                                                |
|-----------|----------------------------------------------------------------------------------------------------------------------------------------------------------------|---------------|--------------|---------------------------------------------------------------------------|----------------------------------------------------------------------------------------------------------------|
| OG0000580 | CRL1506_001118                                                                                                                                                 | CRL681_001791 | MPL16_001368 | TL2766_000646                                                             | WCFS1_000906                                                                                                   |
| OG0000579 | CRL1506_001117                                                                                                                                                 | CRL681_001792 | MPL16_001369 | TL2766_000647                                                             | WCFS1_000907                                                                                                   |
| OG0000578 | CRL1506_001116                                                                                                                                                 | CRL681_001793 | MPL16_001370 | TL2766_000648                                                             | WCFS1_000908                                                                                                   |
| OG0000577 | CRL1506_001115                                                                                                                                                 | CRL681_001794 | MPL16_001371 | TL2766_000649                                                             | WCFS1_000909                                                                                                   |
| OG0000576 | CRL1506_001114                                                                                                                                                 | CRL681_001795 | MPL16_001372 | TL2766_000650                                                             | WCFS1_000910                                                                                                   |
| OG0000575 | CRL1506_001113                                                                                                                                                 | CRL681_001796 | MPL16_001373 | TL2766_000651                                                             | WCFS1_000911                                                                                                   |
| OG0000574 | CRL1506_001112                                                                                                                                                 | CRL681_001797 | MPL16_001374 | TL2766_000652                                                             | WCFS1_000912                                                                                                   |
| OG0000573 | CRL1506_001111                                                                                                                                                 | CRL681_001798 | MPL16_001375 | TL2766_000653                                                             | WCFS1_000913                                                                                                   |
| OG0000572 | CRL1506_001110                                                                                                                                                 | CRL681_001799 | MPL16_001376 | TL2766_000654                                                             | WCFS1_000914                                                                                                   |
| OG0000571 | CRL1506_001109                                                                                                                                                 | CRL681_001800 | MPL16_001377 | TL2766_000655                                                             | WCFS1_000915                                                                                                   |
| OG0000570 | CRL1506_001108                                                                                                                                                 | CRL681_001801 | MPL16_001378 | TL2766_000656                                                             | WCFS1_000916                                                                                                   |
| OG0000002 | CRL1506_000643, CRL1506_000672, CRL1506_000774, CRL1506_001023, CRL1506_001056, CRL1506_001065, CRL1506_001302, CRL1506_001991, CRL1506_002127, CRL1506_002697 |               |              | TL2766_000448, TL2766_001501, TL2766_001755, TL2766_002001, TL2766_002747 | WCFS1_000917, WCFS1_001114, WCFS1_001251, WCFS1_001319, WCFS1_001845, WCFS1_002239, WCFS1_002572, WCFS1_002786 |
|           |                                                                                                                                                                |               |              |                                                                           |                                                                                                                |
|           |                                                                                                                                                                |               |              |                                                                           |                                                                                                                |
|           |                                                                                                                                                                |               |              |                                                                           |                                                                                                                |
|           |                                                                                                                                                                |               |              |                                                                           |                                                                                                                |
| OG0000569 | CRL1506_001107                                                                                                                                                 | CRL681_001802 | MPL16_001379 | TL2766_000657                                                             | WCFS1_000918                                                                                                   |
| OG0000568 | CRL1506_001106                                                                                                                                                 | CRL681_001803 | MPL16_001380 | TL2766_000658                                                             | WCFS1_000919                                                                                                   |
| OG0000567 | CRL1506_001105                                                                                                                                                 | CRL681_001804 | MPL16_001381 | TL2766_000659                                                             | WCFS1_000920                                                                                                   |
| OG0000566 | CRL1506_001104                                                                                                                                                 | CRL681_001805 | MPL16_001382 | TL2766_000660                                                             | WCFS1_000921                                                                                                   |
| OG0000565 | CRL1506_001103                                                                                                                                                 | CRL681_001806 | MPL16_001383 | TL2766_000661                                                             | WCFS1_000922                                                                                                   |
| OG0000564 | CRL1506_001102                                                                                                                                                 | CRL681_001807 | MPL16_001384 | TL2766_000662                                                             | WCFS1_000923                                                                                                   |
| OG0000563 | CRL1506_001101                                                                                                                                                 | CRL681_001808 | MPL16_001385 | TL2766_000663                                                             | WCFS1_000924                                                                                                   |
| OG0000562 | CRL1506_001100                                                                                                                                                 | CRL681_001809 | MPL16_001386 | TL2766_000664                                                             | WCFS1_000925                                                                                                   |
| OG0000561 | CRL1506_001099                                                                                                                                                 | CRL681_001810 | MPL16_001387 | TL2766_000665                                                             | WCFS1_000926                                                                                                   |
| OG0000560 | CRL1506_001098                                                                                                                                                 | CRL681_001811 | MPL16_001388 | TL2766_000666                                                             | WCFS1_000927                                                                                                   |
| OG0000559 | CRL1506_001097                                                                                                                                                 | CRL681_001812 | MPL16_001389 | TL2766_000667                                                             | WCFS1_000928                                                                                                   |
| OG0000558 | CRL1506_001096                                                                                                                                                 | CRL681_001813 | MPL16_001390 | TL2766_000668                                                             | WCFS1_000929                                                                                                   |
| OG0000557 | CRL1506_001095                                                                                                                                                 | CRL681_001814 | MPL16_001391 | TL2766_000669                                                             | WCFS1_000930                                                                                                   |



|           |                                |                              |                            |                              |                                          |
|-----------|--------------------------------|------------------------------|----------------------------|------------------------------|------------------------------------------|
| OG0000556 | CRL1506_001093                 | CRL681_001816                | MPL16_001393               | TL2766_000671                | WCFS1_000932                             |
| OG0002368 | CRL1506_001091                 | CRL681_001818                |                            | TL2766_000673                | WCFS1_000934                             |
| OG0000555 | CRL1506_001090                 | CRL681_001819                | MPL16_001396               | TL2766_000674                | WCFS1_000935                             |
| OG0000554 | CRL1506_001089                 | CRL681_001820                | MPL16_001397               | TL2766_000675                | WCFS1_000936                             |
| OG0000048 | CRL1506_001077, CRL1506_001088 | CRL681_001832                | MPL16_001398, MPL16_001410 | TL2766_000676, TL2766_000687 | WCFS1_000937, WCFS1_000948               |
| OG0000049 | CRL1506_001087, CRL1506_001500 | CRL681_002028                | MPL16_000619, MPL16_001399 | TL2766_000677, TL2766_002878 | WCFS1_000938, WCFS1_001268               |
| OG0000553 | CRL1506_001086                 | CRL681_001823                | MPL16_001400               | TL2766_000678                | WCFS1_000939                             |
| OG0000552 | CRL1506_001085                 | CRL681_001824                | MPL16_001401               | TL2766_000679                | WCFS1_000940                             |
| OG0000551 | CRL1506_001084                 | CRL681_001825                | MPL16_001402               | TL2766_000680                | WCFS1_000941                             |
| OG0000550 | CRL1506_001083                 | CRL681_001826                | MPL16_001403               | TL2766_000681                | WCFS1_000942                             |
| OG0000549 | CRL1506_001082                 | CRL681_001827                | MPL16_001404               | TL2766_000682                | WCFS1_000943                             |
| OG0001014 | CRL1506_001081                 | CRL681_001828                | MPL16_001405               | TL2766_000683                | WCFS1_000944                             |
| OG0000548 | CRL1506_001080                 | CRL681_001829                | MPL16_001406               | TL2766_000684                | WCFS1_000945                             |
| OG0000129 | CRL1506_001079                 | CRL681_001830, CRL681_002242 | MPL16_001408               | TL2766_000685                | WCFS1_000946                             |
| OG0000547 | CRL1506_001078                 | CRL681_001831                | MPL16_001409               | TL2766_000686                | WCFS1_000947                             |
| OG0000546 | CRL1506_001076                 | CRL681_001833                | MPL16_001411               | TL2766_000688                | WCFS1_000949                             |
| OG0000545 | CRL1506_001075                 | CRL681_001834                | MPL16_001412               | TL2766_000689                | WCFS1_000950                             |
| OG0000544 | CRL1506_001074                 | CRL681_001835                | MPL16_001413               | TL2766_000690                | WCFS1_000951                             |
| OG0000543 | CRL1506_001073                 | CRL681_001836                | MPL16_001414               | TL2766_000691                | WCFS1_000952                             |
| OG0000542 | CRL1506_001072                 | CRL681_001837                | MPL16_001415               | TL2766_000692                | WCFS1_000953                             |
| OG0000541 | CRL1506_001071                 | CRL681_001838                | MPL16_001416               | TL2766_000693                | WCFS1_000954                             |
| OG0000062 | CRL1506_000339, CRL1506_002080 | CRL681_000136, CRL681_002270 |                            | TL2766_001959                | WCFS1_000955, WCFS1_002042, WCFS1_002398 |
| OG0000540 | CRL1506_001069                 | CRL681_001843                | MPL16_001417               | TL2766_000697                | WCFS1_000956                             |
| OG0000128 | CRL1506_001068                 | CRL681_001844                | MPL16_001418, MPL16_002619 | TL2766_000698                | WCFS1_000957                             |
| OG0000539 | CRL1506_001067                 | CRL681_001845                | MPL16_001419               | TL2766_000699                | WCFS1_000958                             |
| OG0000538 | CRL1506_001066                 | CRL681_001846                | MPL16_001420               | TL2766_000700                | WCFS1_000959                             |
| OG0002249 | CRL1506_000644                 | CRL681_001847                | MPL16_001421               | TL2766_000701                | WCFS1_000960                             |
| OG0002250 | CRL1506_000645                 | CRL681_001848                | MPL16_001422               | TL2766_000702                | WCFS1_000961                             |

|           |                |                              |              |                              |              |
|-----------|----------------|------------------------------|--------------|------------------------------|--------------|
| OG0002251 | CRL1506_000646 | CRL681_001849                | MPL16_001423 | TL2766_000703                | WCFS1_000962 |
| OG0002252 | CRL1506_000647 | CRL681_001850                | MPL16_001424 | TL2766_000704                | WCFS1_000963 |
| OG0002253 | CRL1506_000648 | CRL681_001853                | MPL16_001425 | TL2766_000705                | WCFS1_000964 |
| OG0002254 | CRL1506_000649 | CRL681_001854                | MPL16_001426 | TL2766_000706                | WCFS1_000965 |
| OG0002255 | CRL1506_000650 | CRL681_001855                | MPL16_001427 | TL2766_000707                | WCFS1_000966 |
| OG0002256 | CRL1506_000651 | CRL681_001856                | MPL16_001428 | TL2766_000708                | WCFS1_000967 |
| OG0002257 | CRL1506_000652 | CRL681_001857                | MPL16_001429 | TL2766_000709                | WCFS1_000968 |
| OG0002258 | CRL1506_000653 | CRL681_001858                | MPL16_001430 | TL2766_000710                | WCFS1_000969 |
| OG0002259 | CRL1506_000654 | CRL681_001859                | MPL16_001431 | TL2766_000711                | WCFS1_000970 |
| OG0002260 | CRL1506_000656 | CRL681_001861                | MPL16_001434 | TL2766_000713                | WCFS1_000972 |
| OG0002261 | CRL1506_000657 | CRL681_001862                | MPL16_001435 | TL2766_000714                | WCFS1_000973 |
| OG0002262 | CRL1506_000658 | CRL681_001863                | MPL16_001436 | TL2766_000715                | WCFS1_000974 |
| OG0002263 | CRL1506_000659 | CRL681_001864                | MPL16_001437 | TL2766_000716                | WCFS1_000975 |
| OG0002264 | CRL1506_000660 | CRL681_001865                | MPL16_001438 | TL2766_000717                | WCFS1_000976 |
| OG0002265 | CRL1506_000661 | CRL681_001866                | MPL16_001439 | TL2766_000718                | WCFS1_000977 |
| OG0002266 | CRL1506_000662 | CRL681_001867                | MPL16_001440 | TL2766_000719                | WCFS1_000978 |
| OG0002267 | CRL1506_000663 | CRL681_001868                | MPL16_001441 | TL2766_000720                | WCFS1_000979 |
| OG0002268 | CRL1506_000664 | CRL681_001869                | MPL16_001442 | TL2766_000721                | WCFS1_000980 |
| OG0002269 | CRL1506_000665 | CRL681_001870                | MPL16_001443 | TL2766_000722                | WCFS1_000981 |
| OG0002270 | CRL1506_000666 | CRL681_001871                | MPL16_001444 | TL2766_000723                | WCFS1_000982 |
| OG0002271 | CRL1506_000667 | CRL681_001872                | MPL16_001445 | TL2766_000724                | WCFS1_000983 |
| OG0002272 | CRL1506_000668 | CRL681_001873                | MPL16_001446 | TL2766_000725                | WCFS1_000984 |
| OG0002273 | CRL1506_000669 | CRL681_001874                | MPL16_001447 | TL2766_000726                | WCFS1_000985 |
| OG0002274 | CRL1506_000670 | CRL681_001875                | MPL16_001448 | TL2766_000727                | WCFS1_000986 |
| OG0000242 | CRL1506_000671 | CRL681_001876                | MPL16_001452 | TL2766_000728, TL2766_002158 | WCFS1_000987 |
| OG0002248 | CRL1506_000642 | CRL681_001877                | MPL16_001453 | TL2766_000729                | WCFS1_000988 |
| OG0000241 | CRL1506_000641 | CRL681_001128, CRL681_001878 | MPL16_001456 | TL2766_000730                | WCFS1_000989 |
| OG0000240 | CRL1506_000640 | CRL681_001129, CRL681_001879 | MPL16_001457 | TL2766_000731                | WCFS1_000990 |
| OG0002247 | CRL1506_000639 | CRL681_001880                | MPL16_001458 | TL2766_000732                | WCFS1_000991 |
| OG0002246 | CRL1506_000638 | CRL681_001881                | MPL16_001459 | TL2766_000733                | WCFS1_000992 |
| OG0002245 | CRL1506_000637 | CRL681_001882                | MPL16_001460 | TL2766_000734                | WCFS1_000993 |

|           |                                                |                              |                            |                              |                                                        |
|-----------|------------------------------------------------|------------------------------|----------------------------|------------------------------|--------------------------------------------------------|
| OG0002244 | CRL1506_000635                                 | CRL681_001884                | MPL16_001462               | TL2766_000736                | WCFS1_000995                                           |
| OG0002243 | CRL1506_000634                                 | CRL681_001885                | MPL16_001463               | TL2766_000737                | WCFS1_000996                                           |
| OG0002242 | CRL1506_000632                                 | CRL681_001887                | MPL16_001467               | TL2766_000739                | WCFS1_000998                                           |
| OG0002241 | CRL1506_000631                                 | CRL681_001888                | MPL16_001468               | TL2766_000740                | WCFS1_000999                                           |
| OG0000239 | CRL1506_000630                                 | CRL681_001889                | MPL16_001469               | TL2766_000741, TL2766_002956 | WCFS1_001000                                           |
| OG0002240 | CRL1506_000629                                 | CRL681_001890                | MPL16_001470               | TL2766_000742                | WCFS1_001001                                           |
| OG0002239 | CRL1506_000628                                 | CRL681_001891                | MPL16_001471               | TL2766_000743                | WCFS1_001002                                           |
| OG0002238 | CRL1506_000627                                 | CRL681_001892                | MPL16_001472               | TL2766_000744                | WCFS1_001003                                           |
| OG0002237 | CRL1506_000626                                 | CRL681_001893                | MPL16_002123               | TL2766_000745                | WCFS1_001004                                           |
| OG0000105 | CRL1506_000555, CRL1506_000625                 | CRL681_000740                | MPL16_002124, MPL16_002569 | TL2766_000746                | WCFS1_001005                                           |
| OG0002236 | CRL1506_000624                                 | CRL681_001895                | MPL16_002125               | TL2766_000747                | WCFS1_001006                                           |
| OG0002235 | CRL1506_000623                                 | CRL681_001896                | MPL16_002126               | TL2766_000748                | WCFS1_001007                                           |
| OG0000108 | CRL1506_000578, CRL1506_000621                 | CRL681_000760                | MPL16_002546               | TL2766_000783                | WCFS1_001009, WCFS1_001044                             |
| OG0003482 |                                                |                              |                            |                              | WCFS1_001010                                           |
| OG0003483 |                                                |                              |                            |                              | WCFS1_001011                                           |
| OG0000069 | CRL1506_000568, CRL1506_000612                 | CRL681_000753, CRL681_000766 | MPL16_002556               | TL2766_000793                | WCFS1_001012, WCFS1_001054                             |
| OG0000107 | CRL1506_000572, CRL1506_000616                 | CRL681_000754                | MPL16_002552               | TL2766_000789                | WCFS1_001013, WCFS1_001050                             |
| OG0002227 | CRL1506_000573                                 | CRL681_000755                |                            | TL2766_000788                | WCFS1_001014, WCFS1_001049                             |
| OG0003484 |                                                |                              |                            |                              | WCFS1_001015                                           |
| OG0000031 | CRL1506_000602, CRL1506_000615, CRL1506_001411 | CRL681_000996                | MPL16_003096               | TL2766_001127                | WCFS1_001016, WCFS1_001032, WCFS1_001036, WCFS1_001794 |
| OG0002961 |                                                | CRL681_000768                |                            |                              | WCFS1_001017                                           |
| OG0003485 |                                                |                              |                            |                              | WCFS1_001018                                           |
| OG0002343 |                                                | CRL681_000765, CRL681_000781 | MPL16_003091               | TL2766_000762                | WCFS1_001019                                           |
| OG0002788 |                                                | CRL681_000782                |                            | TL2766_000761                | WCFS1_001020                                           |

|           |                                                |                              |                            |                              |                            |
|-----------|------------------------------------------------|------------------------------|----------------------------|------------------------------|----------------------------|
| OG0002629 |                                                | CRL681_000780                | MPL16_003092               | TL2766_000763                | WCFS1_001021               |
| OG0002234 | CRL1506_000609                                 | CRL681_000779                | MPL16_003093               | TL2766_000764                | WCFS1_001022               |
| OG0002628 |                                                | CRL681_000778                | MPL16_003094               | TL2766_000765                | WCFS1_001023               |
| OG0002600 | CRL1506_000608                                 | CRL681_000776                |                            | TL2766_000767                | WCFS1_001026               |
| OG0002233 | CRL1506_000607                                 | CRL681_000775                | MPL16_003086               | TL2766_000768                | WCFS1_001027               |
| OG0000030 | CRL1506_000606, CRL1506_000619, CRL1506_001407 | CRL681_000774, CRL681_000992 | MPL16_003087               | TL2766_000769, TL2766_001131 | WCFS1_001028, WCFS1_001798 |
| OG0000052 | CRL1506_000605, CRL1506_001408                 | CRL681_000773, CRL681_000993 | MPL16_003088               | TL2766_000770, TL2766_001130 | WCFS1_001029, WCFS1_001797 |
| OG0000076 | CRL1506_000604, CRL1506_001409                 | CRL681_000994                |                            | TL2766_000771, TL2766_001129 | WCFS1_001030, WCFS1_001796 |
| OG0000077 | CRL1506_000603, CRL1506_001410                 | CRL681_000995                |                            | TL2766_000772, TL2766_001128 | WCFS1_001031, WCFS1_001795 |
| OG0003033 |                                                |                              | MPL16_003098               |                              | WCFS1_001033               |
| OG0003486 |                                                |                              |                            |                              | WCFS1_001034               |
| OG0002632 |                                                | CRL681_000777                |                            | TL2766_000766, TL2766_000779 | WCFS1_001035               |
| OG0002599 | CRL1506_000596                                 | CRL681_000764                |                            | TL2766_000780                | WCFS1_001037               |
| OG0003487 |                                                |                              |                            |                              | WCFS1_001038               |
| OG0002960 |                                                | CRL681_000763                |                            |                              | WCFS1_001039               |
| OG0002232 | CRL1506_000580, CRL1506_000613                 | CRL681_000762                |                            | TL2766_000781                | WCFS1_001042               |
| OG0002231 | CRL1506_000579                                 | CRL681_000761                | MPL16_002545               | TL2766_000782                | WCFS1_001043               |
| OG0002230 | CRL1506_000577                                 | CRL681_000759                | MPL16_002547               | TL2766_000784                | WCFS1_001045               |
| OG0002229 | CRL1506_000576                                 | CRL681_000758                | MPL16_002548               | TL2766_000785                | WCFS1_001046               |
| OG0002228 | CRL1506_000574                                 | CRL681_000756                | MPL16_002550               | TL2766_000787                | WCFS1_001048               |
| OG0001366 | CRL1506_000571, CRL1506_002222                 |                              | MPL16_002553               | TL2766_000790                | WCFS1_001051               |
| OG0002596 | CRL1506_000570                                 |                              | MPL16_002554               | TL2766_000791                | WCFS1_001052               |
| OG0000238 | CRL1506_000569                                 | CRL681_000458                | MPL16_002555               | TL2766_000792, TL2766_002444 | WCFS1_001053               |
| OG0000106 | CRL1506_000567                                 | CRL681_000752, CRL681_000772 | MPL16_002557, MPL16_003089 | TL2766_000794                | WCFS1_001055               |

|           |                |               |              |               |              |
|-----------|----------------|---------------|--------------|---------------|--------------|
| OG0002226 | CRL1506_000566 | CRL681_000751 | MPL16_002558 | TL2766_000795 | WCFS1_001056 |
| OG0002225 | CRL1506_000565 | CRL681_000750 | MPL16_002559 | TL2766_000796 | WCFS1_001057 |
| OG0002224 | CRL1506_000564 | CRL681_000749 | MPL16_002560 | TL2766_000797 | WCFS1_001058 |
| OG0002223 | CRL1506_000563 | CRL681_000748 | MPL16_002561 | TL2766_000798 | WCFS1_001059 |
| OG0002222 | CRL1506_000562 | CRL681_000747 | MPL16_002562 | TL2766_000799 | WCFS1_001060 |
| OG0002221 | CRL1506_000561 | CRL681_000746 | MPL16_002563 | TL2766_000800 | WCFS1_001061 |
| OG0002220 | CRL1506_000560 | CRL681_000745 | MPL16_002564 | TL2766_000801 | WCFS1_001062 |
| OG0002219 | CRL1506_000559 | CRL681_000744 | MPL16_002565 | TL2766_000802 | WCFS1_001063 |
| OG0002218 | CRL1506_000558 | CRL681_000743 | MPL16_002566 | TL2766_000803 | WCFS1_001064 |
| OG0002217 | CRL1506_000557 | CRL681_000742 | MPL16_002567 | TL2766_000804 | WCFS1_001065 |
| OG0002216 | CRL1506_000556 | CRL681_000741 | MPL16_002568 | TL2766_000805 | WCFS1_001066 |
| OG0002595 | CRL1506_000554 |               | MPL16_002571 | TL2766_000806 | WCFS1_001067 |
| OG0002215 | CRL1506_000553 | CRL681_000738 | MPL16_002572 | TL2766_000807 | WCFS1_001068 |
| OG0002214 | CRL1506_000551 | CRL681_000736 | MPL16_002574 | TL2766_000809 | WCFS1_001070 |
| OG0002213 | CRL1506_000550 | CRL681_000735 | MPL16_002575 | TL2766_000810 | WCFS1_001071 |
| OG0002212 | CRL1506_000549 | CRL681_000734 | MPL16_002576 | TL2766_000811 | WCFS1_001072 |
| OG0002211 | CRL1506_000548 | CRL681_000733 | MPL16_002577 | TL2766_000812 | WCFS1_001073 |
| OG0002210 | CRL1506_000547 | CRL681_000732 | MPL16_002578 | TL2766_000813 | WCFS1_001074 |
| OG0002209 | CRL1506_000546 | CRL681_000731 | MPL16_002579 | TL2766_000814 | WCFS1_001075 |
| OG0002208 | CRL1506_000545 | CRL681_000730 | MPL16_002580 | TL2766_000815 | WCFS1_001076 |
| OG0002207 | CRL1506_000544 | CRL681_000729 | MPL16_002581 | TL2766_000816 | WCFS1_001077 |
| OG0002206 | CRL1506_000543 | CRL681_000728 | MPL16_002582 | TL2766_000817 | WCFS1_001078 |
| OG0002205 | CRL1506_000542 | CRL681_000727 | MPL16_002583 | TL2766_000818 | WCFS1_001079 |
| OG0002204 | CRL1506_000541 | CRL681_000726 | MPL16_002584 | TL2766_000819 | WCFS1_001080 |
| OG0002203 | CRL1506_000540 | CRL681_000725 | MPL16_002585 | TL2766_000820 | WCFS1_001081 |
| OG0002202 | CRL1506_000539 | CRL681_000724 | MPL16_002586 | TL2766_000821 | WCFS1_001082 |
| OG0002201 | CRL1506_000538 | CRL681_000723 | MPL16_002587 | TL2766_000822 | WCFS1_001083 |
| OG0002200 | CRL1506_000537 | CRL681_000722 | MPL16_002588 | TL2766_000823 | WCFS1_001084 |
| OG0002199 | CRL1506_000536 | CRL681_000721 | MPL16_002589 | TL2766_000824 | WCFS1_001085 |
| OG0002198 | CRL1506_000535 | CRL681_000720 | MPL16_002590 | TL2766_000825 | WCFS1_001086 |
| OG0002197 | CRL1506_000534 | CRL681_000719 | MPL16_002591 | TL2766_000826 | WCFS1_001087 |
| OG0002196 | CRL1506_000532 | CRL681_000717 | MPL16_002593 | TL2766_000828 | WCFS1_001089 |
| OG0002195 | CRL1506_000531 | CRL681_000716 | MPL16_002594 | TL2766_000829 | WCFS1_001090 |
| OG0002194 | CRL1506_000530 | CRL681_000715 | MPL16_002595 | TL2766_000830 | WCFS1_001091 |

|           |                |               |              |               |              |
|-----------|----------------|---------------|--------------|---------------|--------------|
| OG0002193 | CRL1506_000529 | CRL681_000714 | MPL16_002596 | TL2766_000831 | WCFS1_001092 |
| OG0002192 | CRL1506_000528 | CRL681_000713 | MPL16_002597 | TL2766_000832 | WCFS1_001093 |
| OG0002191 | CRL1506_000527 | CRL681_000712 | MPL16_002598 | TL2766_000833 | WCFS1_001094 |
| OG0002190 | CRL1506_000526 | CRL681_000711 | MPL16_002599 | TL2766_000834 | WCFS1_001095 |
| OG0002189 | CRL1506_000525 | CRL681_000710 | MPL16_002600 | TL2766_000835 | WCFS1_001096 |
| OG0002188 | CRL1506_000524 | CRL681_000709 | MPL16_002601 | TL2766_000836 | WCFS1_001097 |
| OG0000960 | CRL1506_001645 | CRL681_000597 | MPL16_002941 | TL2766_002748 | WCFS1_001115 |
| OG0000959 | CRL1506_001644 | CRL681_000598 | MPL16_002942 | TL2766_002749 | WCFS1_001116 |
| OG0000958 | CRL1506_001643 | CRL681_000599 | MPL16_002943 | TL2766_002750 | WCFS1_001117 |
| OG0000957 | CRL1506_001642 | CRL681_000600 | MPL16_002944 | TL2766_002751 | WCFS1_001118 |
| OG0000956 | CRL1506_001641 | CRL681_000601 | MPL16_002945 | TL2766_002752 | WCFS1_001119 |
| OG0000955 | CRL1506_001640 | CRL681_000602 | MPL16_002946 | TL2766_002753 | WCFS1_001120 |
| OG0000954 | CRL1506_001639 | CRL681_000603 | MPL16_002947 | TL2766_002754 | WCFS1_001121 |
| OG0000953 | CRL1506_001638 | CRL681_000604 | MPL16_002948 | TL2766_002755 | WCFS1_001122 |
| OG0000952 | CRL1506_001637 | CRL681_000605 | MPL16_002949 | TL2766_002756 | WCFS1_001123 |
| OG0000951 | CRL1506_001636 | CRL681_000606 | MPL16_002950 | TL2766_002757 | WCFS1_001124 |
| OG0000950 | CRL1506_001635 | CRL681_000607 | MPL16_002951 | TL2766_002758 | WCFS1_001125 |
| OG0001024 | CRL1506_001634 | CRL681_000608 | MPL16_002952 | TL2766_002759 | WCFS1_001126 |
| OG0000949 | CRL1506_001633 | CRL681_000609 | MPL16_002953 | TL2766_002760 | WCFS1_001127 |
| OG0002415 | CRL1506_001632 | CRL681_000610 | MPL16_001057 |               | WCFS1_001128 |
| OG0002686 | CRL1506_001631 | CRL681_000611 |              |               | WCFS1_001129 |
| OG0002414 | CRL1506_001630 | CRL681_000612 | MPL16_001059 |               | WCFS1_001130 |
| OG0002413 | CRL1506_001629 | CRL681_000613 | MPL16_001060 |               | WCFS1_001131 |
| OG0002412 | CRL1506_001628 | CRL681_000614 | MPL16_001061 |               | WCFS1_001132 |
| OG0000948 | CRL1506_001627 | CRL681_000615 | MPL16_001062 | TL2766_000838 | WCFS1_001133 |
| OG0000947 | CRL1506_001626 | CRL681_000616 | MPL16_001063 | TL2766_000839 | WCFS1_001134 |
| OG0000946 | CRL1506_001625 | CRL681_000617 | MPL16_001064 | TL2766_000840 | WCFS1_001135 |
| OG0000945 | CRL1506_001624 | CRL681_000618 | MPL16_001065 | TL2766_000841 | WCFS1_001136 |
| OG0000944 | CRL1506_001623 | CRL681_000619 | MPL16_001066 | TL2766_000842 | WCFS1_001137 |
| OG0000943 | CRL1506_001622 | CRL681_000620 | MPL16_001067 | TL2766_000843 | WCFS1_001138 |
| OG0000942 | CRL1506_001621 | CRL681_000621 | MPL16_001068 | TL2766_000844 | WCFS1_001139 |
| OG0000941 | CRL1506_001620 | CRL681_000622 | MPL16_001069 | TL2766_000845 | WCFS1_001140 |
| OG0000940 | CRL1506_001619 | CRL681_000623 | MPL16_001070 | TL2766_000846 | WCFS1_001141 |
| OG0000939 | CRL1506_001618 | CRL681_000624 | MPL16_001071 | TL2766_000847 | WCFS1_001142 |

|           |                |               |              |                              |                            |
|-----------|----------------|---------------|--------------|------------------------------|----------------------------|
| OG0000938 | CRL1506_001617 | CRL681_000625 | MPL16_001072 | TL2766_000848                | WCFS1_001143               |
| OG0000937 | CRL1506_001616 | CRL681_000626 | MPL16_001073 | TL2766_000849                | WCFS1_001144               |
| OG0000936 | CRL1506_001615 | CRL681_000627 | MPL16_001074 | TL2766_000850                | WCFS1_001145               |
| OG0000935 | CRL1506_001614 | CRL681_000628 | MPL16_001075 | TL2766_000851                | WCFS1_001146               |
| OG0000156 | CRL1506_001613 | CRL681_000629 | MPL16_001076 | TL2766_000058, TL2766_000852 | WCFS1_001147               |
| OG0000934 | CRL1506_001612 | CRL681_000630 | MPL16_001077 | TL2766_000853                | WCFS1_001148               |
| OG0002685 | CRL1506_001611 | CRL681_000631 |              |                              | WCFS1_001149               |
| OG0002411 | CRL1506_001610 | CRL681_000632 |              | TL2766_000854                | WCFS1_001150               |
| OG0002410 | CRL1506_001609 | CRL681_000633 |              | TL2766_000855                | WCFS1_001151               |
| OG0002409 | CRL1506_001608 | CRL681_000634 |              | TL2766_000856                | WCFS1_001152               |
| OG0000933 | CRL1506_001606 | CRL681_000636 | MPL16_001101 | TL2766_000857                | WCFS1_001153               |
| OG0002408 | CRL1506_001605 | CRL681_000637 |              | TL2766_000858                | WCFS1_001154               |
| OG0002407 | CRL1506_001604 | CRL681_000638 |              | TL2766_000859                | WCFS1_001155               |
| OG0002785 |                | CRL681_000639 |              | TL2766_000860                | WCFS1_001156               |
| OG0000232 | CRL1506_000300 | CRL681_000287 | MPL16_000299 | TL2766_002000                | WCFS1_001157, WCFS1_002204 |
| OG0003490 |                |               |              |                              | WCFS1_001158               |
| OG0003488 |                |               |              |                              | WCFS1_001159               |
| OG0003489 |                |               |              |                              | WCFS1_001161               |
| OG0000932 | CRL1506_001602 | CRL681_000640 | MPL16_001238 | TL2766_000861                | WCFS1_001163               |
| OG0000931 | CRL1506_001601 | CRL681_000641 | MPL16_001239 | TL2766_000862                | WCFS1_001164               |
| OG0000930 | CRL1506_001600 | CRL681_000642 | MPL16_001241 | TL2766_000863                | WCFS1_001165               |
| OG0000929 | CRL1506_001599 | CRL681_000643 | MPL16_001242 | TL2766_000864                | WCFS1_001166               |
| OG0000928 | CRL1506_001598 | CRL681_000644 | MPL16_001243 | TL2766_000865                | WCFS1_001167               |
| OG0000927 | CRL1506_001597 | CRL681_000645 | MPL16_001244 | TL2766_000866                | WCFS1_001168               |
| OG0000926 | CRL1506_001596 | CRL681_000646 | MPL16_001245 | TL2766_000867                | WCFS1_001169               |
| OG0000925 | CRL1506_001595 | CRL681_000647 | MPL16_001246 | TL2766_000868                | WCFS1_001170               |
| OG0000924 | CRL1506_001594 | CRL681_000648 | MPL16_001247 | TL2766_000869                | WCFS1_001171               |
| OG0000923 | CRL1506_001593 | CRL681_000649 | MPL16_001248 | TL2766_000870                | WCFS1_001172               |
| OG0000922 | CRL1506_001592 | CRL681_000650 | MPL16_001249 | TL2766_000871                | WCFS1_001173               |
| OG0000921 | CRL1506_001589 | CRL681_001361 | MPL16_001536 | TL2766_000874                | WCFS1_001176               |
| OG0000920 | CRL1506_001588 | CRL681_001360 | MPL16_001535 | TL2766_000875                | WCFS1_001177               |
| OG0000919 | CRL1506_001587 | CRL681_001359 | MPL16_001534 | TL2766_000876                | WCFS1_001178               |

|           |                                |                              |                            |                              |                            |
|-----------|--------------------------------|------------------------------|----------------------------|------------------------------|----------------------------|
| OG0000918 | CRL1506_001586                 | CRL681_001358                | MPL16_001533               | TL2766_000877                | WCFS1_001179               |
| OG0000917 | CRL1506_001585                 | CRL681_001357                | MPL16_001532               | TL2766_000878                | WCFS1_001180               |
| OG0000916 | CRL1506_001584                 | CRL681_001356                | MPL16_001531               | TL2766_000879                | WCFS1_001181               |
| OG0000915 | CRL1506_001583                 | CRL681_001355                | MPL16_001530               | TL2766_000880                | WCFS1_001182               |
| OG0000914 | CRL1506_001582                 | CRL681_001354                | MPL16_001529               | TL2766_000881                | WCFS1_001183               |
| OG0000913 | CRL1506_001581                 | CRL681_001353                | MPL16_001528               | TL2766_000882                | WCFS1_001184               |
| OG0000912 | CRL1506_001580                 | CRL681_001352                | MPL16_001527               | TL2766_000883                | WCFS1_001185               |
| OG0000911 | CRL1506_001579                 | CRL681_001351                | MPL16_001526               | TL2766_000884                | WCFS1_001186               |
| OG0000910 | CRL1506_001578                 | CRL681_001350                | MPL16_001525               | TL2766_000885                | WCFS1_001187               |
| OG0000909 | CRL1506_001577                 | CRL681_001349                | MPL16_001524               | TL2766_000886                | WCFS1_001188               |
| OG0000908 | CRL1506_001576                 | CRL681_001348                | MPL16_001523               | TL2766_000887                | WCFS1_001189               |
| OG0002406 | CRL1506_001573                 | CRL681_001345                | MPL16_001520               |                              | WCFS1_001192               |
| OG0000907 | CRL1506_001572                 | CRL681_001344                | MPL16_001519               | TL2766_000891                | WCFS1_001193               |
| OG0000906 | CRL1506_001571                 | CRL681_001343                | MPL16_001518               | TL2766_000892                | WCFS1_001194               |
| OG0000905 | CRL1506_001570                 | CRL681_001342                | MPL16_001517               | TL2766_000893                | WCFS1_001195               |
| OG0002684 | CRL1506_001568                 |                              | MPL16_001515               |                              | WCFS1_001197               |
| OG0002404 | CRL1506_001567                 | CRL681_001339                | MPL16_001514               |                              | WCFS1_001198               |
| OG0002403 | CRL1506_001566                 | CRL681_001338                | MPL16_001513               |                              | WCFS1_001199               |
| OG0002402 | CRL1506_001565                 | CRL681_001337                | MPL16_001512               |                              | WCFS1_001200               |
| OG0002683 | CRL1506_001564                 | CRL681_001336                |                            |                              | WCFS1_001201               |
| OG0002401 | CRL1506_001563                 | CRL681_001335                | MPL16_001510               |                              | WCFS1_001202               |
| OG0000904 | CRL1506_001562                 | CRL681_001334                | MPL16_001509               | TL2766_000895                | WCFS1_001203               |
| OG0000903 | CRL1506_001561                 | CRL681_001333                | MPL16_001508               | TL2766_000896                | WCFS1_001204               |
| OG0000023 | CRL1506_000948, CRL1506_001560 | CRL681_001071, CRL681_001332 | MPL16_000121, MPL16_001507 | TL2766_000897, TL2766_001000 | WCFS1_001205, WCFS1_001720 |
| OG0000902 | CRL1506_001559                 | CRL681_001331                | MPL16_001506               | TL2766_000898                | WCFS1_001206               |
| OG0000901 | CRL1506_001558                 | CRL681_001330                | MPL16_001505               | TL2766_000899                | WCFS1_001207               |
| OG0002400 | CRL1506_001557                 |                              | MPL16_001504               | TL2766_000900                | WCFS1_001208               |
| OG0000900 | CRL1506_001556                 | CRL681_001969                | MPL16_001503               | TL2766_000901                | WCFS1_001209               |
| OG0000899 | CRL1506_001555                 | CRL681_001970                | MPL16_001502               | TL2766_000902                | WCFS1_001210               |
| OG0000898 | CRL1506_001554                 | CRL681_001971                | MPL16_001501               | TL2766_000903                | WCFS1_001211               |
| OG0000897 | CRL1506_001553                 | CRL681_001972                | MPL16_001500               | TL2766_000904                | WCFS1_001212               |
| OG0000896 | CRL1506_001552                 | CRL681_001973                | MPL16_001499               | TL2766_000905                | WCFS1_001213               |
| OG0000895 | CRL1506_001551                 | CRL681_001974                | MPL16_001498               | TL2766_000906                | WCFS1_001214               |



|           |                |                              |              |               |              |
|-----------|----------------|------------------------------|--------------|---------------|--------------|
| OG0002399 | CRL1506_001550 | CRL681_001975                |              | TL2766_000907 | WCFS1_001215 |
| OG0002398 | CRL1506_001549 | CRL681_001976                |              | TL2766_000908 | WCFS1_001216 |
| OG0000894 | CRL1506_001548 | CRL681_001977                | MPL16_001497 | TL2766_000909 | WCFS1_001217 |
| OG0000893 | CRL1506_001547 | CRL681_001978                | MPL16_001496 | TL2766_000910 | WCFS1_001218 |
| OG0000892 | CRL1506_001546 | CRL681_001979                | MPL16_001495 | TL2766_000911 | WCFS1_001219 |
| OG0002397 | CRL1506_001545 | CRL681_001980                |              | TL2766_000912 | WCFS1_001220 |
| OG0000891 | CRL1506_001544 | CRL681_001981                | MPL16_001493 | TL2766_000913 | WCFS1_001221 |
| OG0002819 | CRL1506_001543 |                              |              |               | WCFS1_001222 |
| OG0000155 | CRL1506_001537 | CRL681_000563, CRL681_001983 | MPL16_001487 | TL2766_000919 | WCFS1_001223 |
| OG0000154 | CRL1506_001536 | CRL681_000562, CRL681_001984 | MPL16_001486 | TL2766_000920 | WCFS1_001224 |
| OG0000890 | CRL1506_001535 | CRL681_001985                | MPL16_001485 | TL2766_000921 | WCFS1_001225 |
| OG0000889 | CRL1506_001534 | CRL681_001986                | MPL16_000569 | TL2766_000922 | WCFS1_001226 |
| OG0000888 | CRL1506_001531 | CRL681_001989                | MPL16_000572 | TL2766_000925 | WCFS1_001228 |
| OG0000887 | CRL1506_001530 | CRL681_001990                | MPL16_000573 | TL2766_000926 | WCFS1_001229 |
| OG0002394 | CRL1506_001529 | CRL681_001991                | MPL16_000582 |               | WCFS1_001230 |
| OG0000886 | CRL1506_001528 | CRL681_001992                | MPL16_000583 | TL2766_000928 | WCFS1_001231 |
| OG0000885 | CRL1506_001527 | CRL681_001993                | MPL16_000584 | TL2766_000929 | WCFS1_001232 |
| OG0002393 | CRL1506_001526 | CRL681_001994                |              | TL2766_000930 | WCFS1_001233 |
| OG0002392 | CRL1506_001525 | CRL681_001995                |              | TL2766_000931 | WCFS1_001234 |
| OG0000884 | CRL1506_001524 | CRL681_001996                | MPL16_000587 | TL2766_000932 | WCFS1_001235 |
| OG0000883 | CRL1506_001523 | CRL681_001997                | MPL16_000588 | TL2766_000933 | WCFS1_001236 |
| OG0000882 | CRL1506_001522 | CRL681_001998                | MPL16_000589 | TL2766_000934 | WCFS1_001237 |
| OG0000881 | CRL1506_001521 | CRL681_001999                | MPL16_000590 | TL2766_000935 | WCFS1_001238 |
| OG0000880 | CRL1506_001520 | CRL681_002000                | MPL16_000591 | TL2766_000936 | WCFS1_001239 |
| OG0000879 | CRL1506_001519 | CRL681_002001                | MPL16_000592 | TL2766_000937 | WCFS1_001240 |
| OG0000878 | CRL1506_001518 | CRL681_002002                | MPL16_000593 | TL2766_000938 | WCFS1_001241 |
| OG0000877 | CRL1506_001517 | CRL681_002003                | MPL16_000594 | TL2766_000939 | WCFS1_001242 |
| OG0000876 | CRL1506_001516 | CRL681_002004                | MPL16_000595 | TL2766_000940 | WCFS1_001243 |
| OG0000875 | CRL1506_001515 | CRL681_002005                | MPL16_000596 | TL2766_000941 | WCFS1_001244 |
| OG0000874 | CRL1506_001514 | CRL681_002006                | MPL16_000597 | TL2766_000942 | WCFS1_001245 |
| OG0000873 | CRL1506_001513 | CRL681_002007                | MPL16_000598 | TL2766_000943 | WCFS1_001246 |
| OG0000872 | CRL1506_001512 | CRL681_002008                | MPL16_000599 | TL2766_000944 | WCFS1_001247 |

|           |                |               |              |               |              |
|-----------|----------------|---------------|--------------|---------------|--------------|
| OG0000871 | CRL1506_001511 | CRL681_002009 | MPL16_000600 | TL2766_000945 | WCFS1_001248 |
| OG0000870 | CRL1506_001510 | CRL681_002010 | MPL16_000601 | TL2766_000946 | WCFS1_001249 |
| OG0000869 | CRL1506_001509 | CRL681_002011 | MPL16_000602 | TL2766_000947 | WCFS1_001250 |
| OG0000868 | CRL1506_001508 | CRL681_002012 | MPL16_000603 | TL2766_000948 | WCFS1_001252 |
| OG0000867 | CRL1506_001507 | CRL681_002013 | MPL16_000604 | TL2766_000949 | WCFS1_001253 |
| OG0000866 | CRL1506_001506 | CRL681_002014 | MPL16_000605 | TL2766_000950 | WCFS1_001254 |
| OG0000865 | CRL1506_001505 | CRL681_002015 | MPL16_000606 | TL2766_000951 | WCFS1_001255 |
| OG0000864 | CRL1506_001504 | CRL681_002016 | MPL16_000607 | TL2766_000952 | WCFS1_001256 |
| OG0000863 | CRL1506_001503 | CRL681_002017 | MPL16_000608 | TL2766_000953 | WCFS1_001257 |
| OG0000862 | CRL1506_001502 | CRL681_002018 | MPL16_000609 | TL2766_000954 | WCFS1_001258 |
| OG0000861 | CRL1506_001501 | CRL681_002019 | MPL16_000610 | TL2766_000955 | WCFS1_001259 |
| OG0002638 |                | CRL681_002020 | MPL16_000611 | TL2766_000956 | WCFS1_001260 |
| OG0002639 |                | CRL681_002021 | MPL16_000612 | TL2766_002871 | WCFS1_001261 |
| OG0002640 |                | CRL681_002022 | MPL16_000613 | TL2766_002872 | WCFS1_001262 |
| OG0002641 |                | CRL681_002023 | MPL16_000614 | TL2766_002873 | WCFS1_001263 |
| OG0002642 |                | CRL681_002024 | MPL16_000615 | TL2766_002874 | WCFS1_001264 |
| OG0002643 |                | CRL681_002025 | MPL16_000616 | TL2766_002875 | WCFS1_001265 |
| OG0002644 |                | CRL681_002026 | MPL16_000617 | TL2766_002876 | WCFS1_001266 |
| OG0002645 |                | CRL681_002027 | MPL16_000618 | TL2766_002877 | WCFS1_001267 |
| OG0000860 | CRL1506_001499 | CRL681_002029 | MPL16_000620 | TL2766_002879 | WCFS1_001269 |
| OG0002646 |                | CRL681_002030 | MPL16_000621 | TL2766_002880 | WCFS1_001270 |
| OG0002647 |                | CRL681_002031 | MPL16_000622 | TL2766_002881 | WCFS1_001271 |
| OG0002648 |                | CRL681_002032 | MPL16_000623 | TL2766_002882 | WCFS1_001272 |
| OG0002649 |                | CRL681_002033 | MPL16_000624 | TL2766_002883 | WCFS1_001273 |
| OG0002650 |                | CRL681_002034 | MPL16_000625 | TL2766_002884 | WCFS1_001274 |
| OG0002651 |                | CRL681_002035 | MPL16_000626 | TL2766_002885 | WCFS1_001275 |
| OG0002652 |                | CRL681_002036 | MPL16_000627 | TL2766_002886 | WCFS1_001276 |
| OG0002653 |                | CRL681_002037 | MPL16_000628 | TL2766_002887 | WCFS1_001277 |
| OG0002654 |                | CRL681_002038 | MPL16_000629 | TL2766_002888 | WCFS1_001278 |
| OG0002655 |                | CRL681_002039 | MPL16_000630 | TL2766_002889 | WCFS1_001279 |
| OG0002796 |                | CRL681_002040 |              | TL2766_002890 | WCFS1_001280 |
| OG0002656 |                | CRL681_002041 | MPL16_000632 | TL2766_002891 | WCFS1_001281 |
| OG0002797 |                | CRL681_002042 |              | TL2766_002892 | WCFS1_001282 |
| OG0002657 |                | CRL681_002043 | MPL16_000634 | TL2766_002893 | WCFS1_001283 |

|           |                |               |                                             |               |              |
|-----------|----------------|---------------|---------------------------------------------|---------------|--------------|
| OG0002658 |                | CRL681_002044 | MPL16_000635                                | TL2766_002894 | WCFS1_001284 |
| OG0002659 |                | CRL681_002045 | MPL16_000636                                | TL2766_002895 | WCFS1_001285 |
| OG0002660 |                | CRL681_002046 | MPL16_000637                                | TL2766_002896 | WCFS1_001286 |
| OG0002661 |                | CRL681_002047 | MPL16_000639                                | TL2766_002897 | WCFS1_001287 |
| OG0002662 |                | CRL681_002048 | MPL16_000640                                | TL2766_002898 | WCFS1_001288 |
| OG0003052 |                |               |                                             | TL2766_002899 | WCFS1_001289 |
| OG0003053 |                |               |                                             | TL2766_002900 | WCFS1_001290 |
| OG0000859 | CRL1506_001498 | CRL681_002054 | MPL16_000642                                | TL2766_002901 | WCFS1_001291 |
| OG0000858 | CRL1506_001497 | CRL681_002055 | MPL16_000643                                | TL2766_002902 | WCFS1_001292 |
| OG0000857 | CRL1506_001496 | CRL681_002056 | MPL16_000644                                | TL2766_002903 | WCFS1_001293 |
| OG0000856 | CRL1506_001495 | CRL681_002057 | MPL16_000645                                | TL2766_002904 | WCFS1_001294 |
| OG0000855 | CRL1506_001494 | CRL681_002058 | MPL16_000646                                | TL2766_002905 | WCFS1_001295 |
| OG0000854 | CRL1506_001493 | CRL681_002059 | MPL16_000647                                | TL2766_002906 | WCFS1_001296 |
| OG0000853 | CRL1506_001492 | CRL681_002060 | MPL16_000648                                | TL2766_002907 | WCFS1_001297 |
| OG0000852 | CRL1506_001491 | CRL681_002061 | MPL16_000649                                | TL2766_002908 | WCFS1_001298 |
| OG0000851 | CRL1506_001490 | CRL681_002062 | MPL16_000650                                | TL2766_002909 | WCFS1_001299 |
| OG0000850 | CRL1506_001489 | CRL681_002063 | MPL16_000651                                | TL2766_002910 | WCFS1_001300 |
| OG0000849 | CRL1506_001488 | CRL681_002064 | MPL16_000652                                | TL2766_002911 | WCFS1_001301 |
| OG0000848 | CRL1506_001487 | CRL681_002065 | MPL16_000653                                | TL2766_002912 | WCFS1_001302 |
| OG0000847 | CRL1506_001486 | CRL681_002066 | MPL16_000654                                | TL2766_002913 | WCFS1_001303 |
| OG0000846 | CRL1506_001485 | CRL681_002067 | MPL16_000655                                | TL2766_002914 | WCFS1_001304 |
| OG0000845 | CRL1506_001484 | CRL681_002068 | MPL16_000656                                | TL2766_002915 | WCFS1_001305 |
| OG0000844 | CRL1506_001483 | CRL681_002069 | MPL16_000657                                | TL2766_002916 | WCFS1_001306 |
| OG0000104 | CRL1506_000522 | CRL681_002070 | MPL16_000577, MPL16_000666,<br>MPL16_002642 | TL2766_002917 | WCFS1_001307 |
| OG0002187 | CRL1506_000521 | CRL681_002071 | MPL16_000667                                | TL2766_002918 | WCFS1_001308 |
| OG0002186 | CRL1506_000520 | CRL681_002072 | MPL16_000668                                | TL2766_002919 | WCFS1_001309 |
| OG0002185 | CRL1506_000519 | CRL681_002073 | MPL16_000669                                | TL2766_002920 | WCFS1_001310 |
| OG0002184 | CRL1506_000518 | CRL681_002074 | MPL16_000670                                | TL2766_002921 | WCFS1_001311 |
| OG0002183 | CRL1506_000517 | CRL681_002075 | MPL16_000671                                | TL2766_002922 | WCFS1_001312 |
| OG0002182 | CRL1506_000516 | CRL681_002076 | MPL16_000672                                | TL2766_002923 | WCFS1_001313 |
| OG0002181 | CRL1506_000515 | CRL681_002077 | MPL16_000673                                | TL2766_002924 | WCFS1_001314 |
| OG0002298 | CRL1506_000514 | CRL681_002078 | MPL16_000674                                | TL2766_002925 | WCFS1_001315 |

|           |                |                              |              |               |              |
|-----------|----------------|------------------------------|--------------|---------------|--------------|
| OG0002180 | CRL1506_000513 | CRL681_002079                | MPL16_000675 | TL2766_002926 | WCFS1_001316 |
| OG0002179 | CRL1506_000512 | CRL681_002080                | MPL16_000676 | TL2766_002927 | WCFS1_001317 |
| OG0002178 | CRL1506_000511 | CRL681_002081                | MPL16_000677 | TL2766_002928 | WCFS1_001318 |
| OG0002177 | CRL1506_000510 | CRL681_002082                | MPL16_000678 | TL2766_002929 | WCFS1_001320 |
| OG0002176 | CRL1506_000509 | CRL681_002083                | MPL16_000679 | TL2766_002930 | WCFS1_001321 |
| OG0002175 | CRL1506_000508 | CRL681_002084                | MPL16_000680 | TL2766_002931 | WCFS1_001322 |
| OG0000237 | CRL1506_000506 | CRL681_000582, CRL681_002086 | MPL16_000682 | TL2766_002933 | WCFS1_001324 |
| OG0002174 | CRL1506_000505 | CRL681_002087                | MPL16_000683 | TL2766_002934 | WCFS1_001325 |
| OG0002173 | CRL1506_000504 | CRL681_002088                | MPL16_000684 | TL2766_002935 | WCFS1_001326 |
| OG0002172 | CRL1506_000503 | CRL681_002089                | MPL16_000685 | TL2766_002936 | WCFS1_001327 |
| OG0002171 | CRL1506_000502 | CRL681_002090                | MPL16_000686 | TL2766_002937 | WCFS1_001328 |
| OG0002170 | CRL1506_000501 | CRL681_002091                | MPL16_000687 | TL2766_002938 | WCFS1_001329 |
| OG0002169 | CRL1506_000500 | CRL681_002092                | MPL16_000688 | TL2766_002939 | WCFS1_001330 |
| OG0002168 | CRL1506_000499 | CRL681_002093                | MPL16_000689 | TL2766_002940 | WCFS1_001331 |
| OG0002167 | CRL1506_000498 | CRL681_002094                | MPL16_000690 | TL2766_002941 | WCFS1_001332 |
| OG0002166 | CRL1506_000497 | CRL681_002095                | MPL16_000691 | TL2766_002942 | WCFS1_001333 |
| OG0002165 | CRL1506_000496 | CRL681_002096                | MPL16_000692 | TL2766_002943 | WCFS1_001334 |
| OG0002164 | CRL1506_000495 | CRL681_002097                | MPL16_000693 | TL2766_002944 | WCFS1_001335 |
| OG0002163 | CRL1506_000494 | CRL681_002098                | MPL16_000694 | TL2766_002945 | WCFS1_001336 |
| OG0002162 | CRL1506_000493 | CRL681_002099                | MPL16_000695 | TL2766_002946 | WCFS1_001337 |
| OG0002161 | CRL1506_000492 | CRL681_002100                | MPL16_000696 | TL2766_002947 | WCFS1_001338 |
| OG0002160 | CRL1506_000491 | CRL681_002101                | MPL16_000697 | TL2766_002948 | WCFS1_001339 |
| OG0002159 | CRL1506_000490 | CRL681_002102                | MPL16_000698 | TL2766_002949 | WCFS1_001340 |
| OG0002158 | CRL1506_000489 | CRL681_002103                | MPL16_000699 | TL2766_002950 | WCFS1_001341 |
| OG0002157 | CRL1506_000488 | CRL681_002104                | MPL16_000700 | TL2766_002951 | WCFS1_001342 |
| OG0001814 | CRL1506_002981 | CRL681_002105                | MPL16_000701 | TL2766_002957 | WCFS1_001343 |
| OG0001815 | CRL1506_002982 | CRL681_002106                | MPL16_000702 | TL2766_002958 | WCFS1_001344 |
| OG0001816 | CRL1506_002983 | CRL681_002107                | MPL16_000703 | TL2766_002959 | WCFS1_001345 |
| OG0001817 | CRL1506_002984 | CRL681_002108                | MPL16_000704 | TL2766_002960 | WCFS1_001346 |
| OG0001818 | CRL1506_002985 | CRL681_002109                | MPL16_000705 | TL2766_002961 | WCFS1_001347 |
| OG0001819 | CRL1506_002986 | CRL681_002110                | MPL16_000706 | TL2766_002962 | WCFS1_001348 |
| OG0001820 | CRL1506_002987 | CRL681_002111                | MPL16_000707 | TL2766_002963 | WCFS1_001349 |
| OG0001821 | CRL1506_002988 | CRL681_002112                | MPL16_000708 | TL2766_002964 | WCFS1_001350 |

|           |                |               |              |               |              |
|-----------|----------------|---------------|--------------|---------------|--------------|
| OG0001822 | CRL1506_002989 | CRL681_002113 | MPL16_000709 | TL2766_002965 | WCFS1_001351 |
| OG0001823 | CRL1506_002990 | CRL681_002114 | MPL16_000710 | TL2766_002966 | WCFS1_001352 |
| OG0001824 | CRL1506_002991 | CRL681_002115 | MPL16_000711 | TL2766_002967 | WCFS1_001353 |
| OG0001825 | CRL1506_002992 | CRL681_002116 | MPL16_000712 | TL2766_002968 | WCFS1_001354 |
| OG0001826 | CRL1506_002993 | CRL681_002117 | MPL16_000713 | TL2766_002969 | WCFS1_001355 |
| OG0001827 | CRL1506_002994 | CRL681_002118 | MPL16_000714 | TL2766_002970 | WCFS1_001356 |
| OG0001828 | CRL1506_002995 | CRL681_002119 | MPL16_000715 | TL2766_002971 | WCFS1_001357 |
| OG0001829 | CRL1506_002996 | CRL681_002120 | MPL16_000716 | TL2766_002972 | WCFS1_001358 |
| OG0001830 | CRL1506_002997 | CRL681_002121 | MPL16_000717 | TL2766_002973 | WCFS1_001359 |
| OG0001831 | CRL1506_002998 | CRL681_002122 | MPL16_000718 | TL2766_002974 | WCFS1_001360 |
| OG0001832 | CRL1506_002999 | CRL681_002123 | MPL16_000719 | TL2766_002975 | WCFS1_001361 |
| OG0001833 | CRL1506_003001 | CRL681_002125 | MPL16_000721 | TL2766_002977 | WCFS1_001363 |
| OG0001834 | CRL1506_003002 | CRL681_002126 | MPL16_000722 | TL2766_002978 | WCFS1_001364 |
| OG0001835 | CRL1506_003003 | CRL681_002127 | MPL16_000723 | TL2766_002979 | WCFS1_001365 |
| OG0001836 | CRL1506_003004 | CRL681_002128 | MPL16_000724 | TL2766_002980 | WCFS1_001366 |
| OG0001837 | CRL1506_003005 | CRL681_002129 | MPL16_000725 | TL2766_002981 | WCFS1_001367 |
| OG0001838 | CRL1506_003006 | CRL681_002130 | MPL16_000726 | TL2766_002982 | WCFS1_001368 |
| OG0001839 | CRL1506_003007 | CRL681_002131 | MPL16_000727 | TL2766_002983 | WCFS1_001369 |
| OG0001840 | CRL1506_003008 | CRL681_002132 | MPL16_000728 | TL2766_002984 | WCFS1_001370 |
| OG0001841 | CRL1506_003009 | CRL681_002133 | MPL16_000729 | TL2766_002985 | WCFS1_001371 |
| OG0001842 | CRL1506_003010 | CRL681_002134 | MPL16_000730 | TL2766_002986 | WCFS1_001372 |
| OG0001843 | CRL1506_003011 | CRL681_002135 | MPL16_000731 | TL2766_002987 | WCFS1_001373 |
| OG0001844 | CRL1506_003012 | CRL681_002136 | MPL16_000732 | TL2766_002988 | WCFS1_001374 |
| OG0001845 | CRL1506_003013 | CRL681_002137 | MPL16_000733 | TL2766_002989 | WCFS1_001375 |
| OG0001846 | CRL1506_003014 | CRL681_002138 | MPL16_000734 | TL2766_002990 | WCFS1_001376 |
| OG0001847 | CRL1506_003015 | CRL681_002139 | MPL16_000735 | TL2766_002991 | WCFS1_001377 |
| OG0001848 | CRL1506_003016 | CRL681_002140 | MPL16_000736 | TL2766_002992 | WCFS1_001378 |
| OG0002561 | CRL1506_003017 | CRL681_002141 |              | TL2766_002993 | WCFS1_001379 |
| OG0001849 | CRL1506_003018 | CRL681_002142 | MPL16_000738 | TL2766_002994 | WCFS1_001380 |
| OG0001850 | CRL1506_003019 | CRL681_002143 | MPL16_000739 | TL2766_002995 | WCFS1_001381 |
| OG0001879 | CRL1506_003020 | CRL681_002144 | MPL16_000740 | TL2766_002996 | WCFS1_001382 |
| OG0001851 | CRL1506_003021 | CRL681_002145 | MPL16_000741 | TL2766_002997 | WCFS1_001383 |
| OG0001852 | CRL1506_003022 | CRL681_002146 | MPL16_000742 | TL2766_002998 | WCFS1_001384 |
| OG0001853 | CRL1506_003023 | CRL681_002147 | MPL16_000743 | TL2766_002999 | WCFS1_001385 |

|           |                                |               |                            |               |              |
|-----------|--------------------------------|---------------|----------------------------|---------------|--------------|
| OG0001854 | CRL1506_003024                 | CRL681_002148 | MPL16_000744               | TL2766_003000 | WCFS1_001386 |
| OG0001855 | CRL1506_003025                 | CRL681_002149 | MPL16_000745               | TL2766_003001 | WCFS1_001387 |
| OG0001856 | CRL1506_003026                 | CRL681_002150 | MPL16_000746               | TL2766_003002 | WCFS1_001388 |
| OG0001857 | CRL1506_003027                 | CRL681_002151 | MPL16_000747               | TL2766_003003 | WCFS1_001389 |
| OG0001858 | CRL1506_003028                 | CRL681_002152 | MPL16_000748               | TL2766_003004 | WCFS1_001390 |
| OG0001859 | CRL1506_003029                 | CRL681_002153 | MPL16_000749               | TL2766_003005 | WCFS1_001391 |
| OG0001860 | CRL1506_003030                 | CRL681_002154 | MPL16_000750               | TL2766_003006 | WCFS1_001392 |
| OG0000224 | CRL1506_003031                 | CRL681_002155 | MPL16_000751, MPL16_003169 | TL2766_003007 | WCFS1_001393 |
| OG0001861 | CRL1506_003032                 | CRL681_002156 | MPL16_000752               | TL2766_003008 | WCFS1_001394 |
| OG0002875 | CRL1506_003033                 |               |                            |               | WCFS1_001395 |
| OG0001862 | CRL1506_003034                 | CRL681_002157 | MPL16_000753               | TL2766_003009 | WCFS1_001396 |
| OG0001863 | CRL1506_003035                 | CRL681_002158 | MPL16_000754               | TL2766_003010 | WCFS1_001397 |
| OG0001864 | CRL1506_003036                 | CRL681_002159 | MPL16_000755               | TL2766_003011 | WCFS1_001398 |
| OG0001865 | CRL1506_003037                 | CRL681_002160 | MPL16_000756               | TL2766_003012 | WCFS1_001399 |
| OG0001866 | CRL1506_003038                 | CRL681_002161 | MPL16_000757               | TL2766_003013 | WCFS1_001400 |
| OG0001867 | CRL1506_003039                 | CRL681_002162 | MPL16_000758               | TL2766_003014 | WCFS1_001401 |
| OG0001868 | CRL1506_003040                 | CRL681_002163 | MPL16_000759               | TL2766_003015 | WCFS1_001402 |
| OG0001869 | CRL1506_003041                 | CRL681_002164 | MPL16_000760               | TL2766_003016 | WCFS1_001403 |
| OG0001870 | CRL1506_003042                 | CRL681_002165 | MPL16_000761               | TL2766_003017 | WCFS1_001404 |
| OG0001871 | CRL1506_003043                 | CRL681_002166 | MPL16_000762               | TL2766_003018 | WCFS1_001405 |
| OG0001872 | CRL1506_003044                 | CRL681_002167 | MPL16_000763               | TL2766_003019 | WCFS1_001406 |
| OG0001873 | CRL1506_003045                 | CRL681_002168 | MPL16_000764               | TL2766_003020 | WCFS1_001407 |
| OG0001874 | CRL1506_003046                 | CRL681_002169 | MPL16_000765               | TL2766_003021 | WCFS1_001408 |
| OG0001875 | CRL1506_003047                 | CRL681_002170 | MPL16_000766               | TL2766_003022 | WCFS1_001409 |
| OG0001876 | CRL1506_003048                 | CRL681_002171 | MPL16_000767               | TL2766_003023 | WCFS1_001410 |
| OG0001877 | CRL1506_003049                 | CRL681_002172 | MPL16_000768               | TL2766_003024 | WCFS1_001411 |
| OG0001878 | CRL1506_003050                 | CRL681_002173 | MPL16_000769               | TL2766_003025 | WCFS1_001412 |
| OG0001809 | CRL1506_002980, CRL1506_003051 | CRL681_002174 |                            | TL2766_003026 | WCFS1_001413 |
| OG0001808 | CRL1506_002978                 | CRL681_002176 | MPL16_000778               | TL2766_003028 | WCFS1_001415 |
| OG0001813 | CRL1506_002977                 | CRL681_002177 | MPL16_000779               | TL2766_003029 | WCFS1_001416 |
| OG0001807 | CRL1506_002976                 | CRL681_002178 | MPL16_000780               | TL2766_003030 | WCFS1_001417 |
| OG0001806 | CRL1506_002975                 | CRL681_002179 | MPL16_000781               | TL2766_003031 | WCFS1_001418 |

|           |                |               |                            |                              |                            |
|-----------|----------------|---------------|----------------------------|------------------------------|----------------------------|
| OG0001805 | CRL1506_002974 | CRL681_002180 | MPL16_000782               | TL2766_003032                | WCFS1_001419               |
| OG0001804 | CRL1506_002973 | CRL681_002181 | MPL16_000783               | TL2766_003033                | WCFS1_001420               |
| OG0001803 | CRL1506_002972 | CRL681_002182 | MPL16_000784               | TL2766_003034                | WCFS1_001421               |
| OG0001802 | CRL1506_002971 | CRL681_002183 | MPL16_000785               | TL2766_003035                | WCFS1_001422               |
| OG0001801 | CRL1506_002970 | CRL681_002184 | MPL16_000786               | TL2766_003036                | WCFS1_001423               |
| OG0001800 | CRL1506_002969 | CRL681_002185 | MPL16_000787               | TL2766_003037                | WCFS1_001424               |
| OG0002560 | CRL1506_002968 | CRL681_002186 |                            | TL2766_003038                | WCFS1_001425               |
| OG0002734 | CRL1506_002966 |               |                            | TL2766_002763                | WCFS1_001427               |
| OG0002874 | CRL1506_002965 |               |                            |                              | WCFS1_001428               |
| OG0001799 | CRL1506_002964 | CRL681_002187 | MPL16_000789               | TL2766_003039                | WCFS1_001429               |
| OG0000220 | CRL1506_002963 | CRL681_002188 | MPL16_000790, MPL16_001674 | TL2766_003040                | WCFS1_001430               |
| OG0000098 | CRL1506_002962 | CRL681_002189 | MPL16_000791, MPL16_002194 | TL2766_003041                | WCFS1_001431, WCFS1_002202 |
| OG0001798 | CRL1506_002961 | CRL681_002190 | MPL16_000792               | TL2766_003042                | WCFS1_001432               |
| OG0001797 | CRL1506_002960 | CRL681_002191 | MPL16_000793               | TL2766_003043                | WCFS1_001433               |
| OG0001796 | CRL1506_002959 | CRL681_002192 | MPL16_000794               | TL2766_003044                | WCFS1_001434               |
| OG0001795 | CRL1506_002958 | CRL681_002193 | MPL16_000795               | TL2766_003045                | WCFS1_001435               |
| OG0001794 | CRL1506_002957 | CRL681_002194 | MPL16_000796               | TL2766_003046                | WCFS1_001436               |
| OG0001793 | CRL1506_002956 | CRL681_002195 | MPL16_000797               | TL2766_003047                | WCFS1_001437               |
| OG0001792 | CRL1506_002955 | CRL681_002196 | MPL16_000798               | TL2766_003048                | WCFS1_001438               |
| OG0000219 | CRL1506_002954 | CRL681_002197 | MPL16_000799               | TL2766_000293, TL2766_003049 | WCFS1_001439               |
| OG0001791 | CRL1506_002953 | CRL681_002198 | MPL16_000800               | TL2766_003050                | WCFS1_001440               |
| OG0001790 | CRL1506_002951 | CRL681_002200 | MPL16_000802               | TL2766_003052                | WCFS1_001442               |
| OG0001789 | CRL1506_002950 | CRL681_002201 | MPL16_000803               | TL2766_003053                | WCFS1_001443               |
| OG0001788 | CRL1506_002949 | CRL681_002202 | MPL16_000804               | TL2766_003054                | WCFS1_001444               |
| OG0001787 | CRL1506_002948 | CRL681_002203 | MPL16_000805               | TL2766_003055                | WCFS1_001445               |
| OG0001786 | CRL1506_002947 | CRL681_002204 | MPL16_000812               | TL2766_003056                | WCFS1_001446               |
| OG0001785 | CRL1506_002946 | CRL681_002205 | MPL16_000813               | TL2766_003057                | WCFS1_001447               |
| OG0001784 | CRL1506_002945 | CRL681_002206 | MPL16_000814               | TL2766_003058                | WCFS1_001448               |
| OG0001783 | CRL1506_002944 | CRL681_002207 | MPL16_000815               | TL2766_003059                | WCFS1_001449               |
| OG0001782 | CRL1506_002943 | CRL681_001226 | MPL16_000816               | TL2766_003060                | WCFS1_001450               |
| OG0001781 | CRL1506_002942 | CRL681_001227 | MPL16_000817               | TL2766_003061                | WCFS1_001451               |

|           |                                                                |               |                            |                              |              |
|-----------|----------------------------------------------------------------|---------------|----------------------------|------------------------------|--------------|
| OG0001780 | CRL1506_002941                                                 | CRL681_001228 | MPL16_000818               | TL2766_003062                | WCFS1_001452 |
| OG0000207 | CRL1506_000696, CRL1506_002797, CRL1506_002798, CRL1506_002940 | CRL681_001229 |                            |                              | WCFS1_001453 |
| OG0002971 |                                                                | CRL681_001230 |                            |                              | WCFS1_001454 |
| OG0002972 |                                                                | CRL681_001231 |                            |                              | WCFS1_001455 |
| OG0001721 | CRL1506_002791                                                 | CRL681_001232 | MPL16_000819               | TL2766_003063                | WCFS1_001456 |
| OG0002532 | CRL1506_002790                                                 |               | MPL16_001701               | TL2766_003064                | WCFS1_001457 |
| OG0001720 | CRL1506_002789                                                 | CRL681_001233 | MPL16_003082               | TL2766_003065                | WCFS1_001458 |
| OG0000206 | CRL1506_002788, CRL1506_002801                                 | CRL681_001234 | MPL16_003081               | TL2766_003066                | WCFS1_001459 |
| OG0001719 | CRL1506_002787                                                 | CRL681_001235 |                            | TL2766_000056, TL2766_003067 | WCFS1_001460 |
| OG0001718 | CRL1506_002786                                                 | CRL681_001236 | MPL16_003079               | TL2766_003068                | WCFS1_001461 |
| OG0001717 | CRL1506_002785                                                 | CRL681_001237 | MPL16_003078               | TL2766_003069                | WCFS1_001462 |
| OG0000205 | CRL1506_002784                                                 | CRL681_001238 | MPL16_001874, MPL16_003077 | TL2766_003070                | WCFS1_001463 |
| OG0001716 | CRL1506_002783                                                 | CRL681_001239 | MPL16_003076               | TL2766_003071                | WCFS1_001464 |
| OG0001715 | CRL1506_002782                                                 | CRL681_001240 | MPL16_003075               | TL2766_003072                | WCFS1_001465 |
| OG0001748 | CRL1506_002781                                                 | CRL681_001241 | MPL16_003074               | TL2766_003073                | WCFS1_001466 |
| OG0001714 | CRL1506_002780                                                 | CRL681_001242 | MPL16_003073               | TL2766_003074                | WCFS1_001467 |
| OG0001713 | CRL1506_002779                                                 | CRL681_001243 | MPL16_003072               | TL2766_003075                | WCFS1_001468 |
| OG0001712 | CRL1506_002778                                                 | CRL681_001244 | MPL16_003071               | TL2766_003076                | WCFS1_001469 |
| OG0001711 | CRL1506_002777                                                 | CRL681_001245 | MPL16_003070               | TL2766_003077                | WCFS1_001470 |
| OG0001710 | CRL1506_002776                                                 | CRL681_001246 | MPL16_003069               | TL2766_003078                | WCFS1_001471 |
| OG0001709 | CRL1506_002775                                                 | CRL681_001247 | MPL16_003068               | TL2766_003079                | WCFS1_001472 |
| OG0001708 | CRL1506_002774                                                 | CRL681_001248 | MPL16_003066               | TL2766_003080                | WCFS1_001473 |
| OG0001707 | CRL1506_002773                                                 | CRL681_001249 | MPL16_003065               | TL2766_003081                | WCFS1_001474 |
| OG0001706 | CRL1506_002772                                                 | CRL681_001250 | MPL16_003064               | TL2766_003082                | WCFS1_001475 |
| OG0001705 | CRL1506_002771                                                 | CRL681_001251 | MPL16_003063               | TL2766_003083                | WCFS1_001476 |
| OG0001704 | CRL1506_002770                                                 | CRL681_001252 | MPL16_003062               | TL2766_003084                | WCFS1_001477 |
| OG0001703 | CRL1506_002769                                                 | CRL681_001253 | MPL16_003061               | TL2766_003085                | WCFS1_001478 |
| OG0001702 | CRL1506_002768                                                 | CRL681_001254 | MPL16_003060               | TL2766_003086                | WCFS1_001479 |



|           |                |               |                            |               |              |
|-----------|----------------|---------------|----------------------------|---------------|--------------|
| OG0001701 | CRL1506_002767 | CRL681_001255 | MPL16_003059               | TL2766_003087 | WCFS1_001480 |
| OG0001700 | CRL1506_002766 | CRL681_001256 | MPL16_003058               | TL2766_003088 | WCFS1_001481 |
| OG0001699 | CRL1506_002765 | CRL681_001257 | MPL16_003057               | TL2766_003089 | WCFS1_001482 |
| OG0001698 | CRL1506_002763 | CRL681_001259 | MPL16_003055               | TL2766_003091 | WCFS1_001484 |
| OG0001697 | CRL1506_002762 | CRL681_001260 | MPL16_003054               | TL2766_003092 | WCFS1_001485 |
| OG0001696 | CRL1506_002761 | CRL681_001261 | MPL16_003053               | TL2766_003093 | WCFS1_001486 |
| OG0001695 | CRL1506_002760 | CRL681_001262 | MPL16_003052               | TL2766_003094 | WCFS1_001487 |
| OG0001694 | CRL1506_002759 | CRL681_001263 | MPL16_003051               | TL2766_003095 | WCFS1_001488 |
| OG0001693 | CRL1506_002758 | CRL681_001264 | MPL16_003050               | TL2766_003096 | WCFS1_001489 |
| OG0001747 | CRL1506_002757 | CRL681_001265 | MPL16_003049               | TL2766_003097 | WCFS1_001490 |
| OG0001692 | CRL1506_002756 | CRL681_001266 | MPL16_003048               | TL2766_003098 | WCFS1_001491 |
| OG0001691 | CRL1506_002754 | CRL681_001268 | MPL16_003046               | TL2766_003100 | WCFS1_001493 |
| OG0001690 | CRL1506_002753 | CRL681_001269 | MPL16_003045               | TL2766_003101 | WCFS1_001494 |
| OG0001689 | CRL1506_002752 | CRL681_001270 | MPL16_003044               | TL2766_003102 | WCFS1_001495 |
| OG0001688 | CRL1506_002751 | CRL681_001271 | MPL16_003043               | TL2766_003103 | WCFS1_001496 |
| OG0001687 | CRL1506_002750 | CRL681_001272 | MPL16_003042               | TL2766_003104 | WCFS1_001497 |
| OG0001686 | CRL1506_002749 | CRL681_001273 | MPL16_003041               | TL2766_003105 | WCFS1_001498 |
| OG0001685 | CRL1506_002748 | CRL681_001274 | MPL16_003040               | TL2766_003106 | WCFS1_001499 |
| OG0001684 | CRL1506_002747 | CRL681_001275 | MPL16_003039               | TL2766_003107 | WCFS1_001500 |
| OG0001683 | CRL1506_002746 | CRL681_001276 | MPL16_003038               | TL2766_003108 | WCFS1_001501 |
| OG0001682 | CRL1506_002745 | CRL681_001277 | MPL16_003037               | TL2766_003109 | WCFS1_001502 |
| OG0001681 | CRL1506_002744 | CRL681_001278 | MPL16_003036               | TL2766_003110 | WCFS1_001503 |
| OG0001680 | CRL1506_002743 | CRL681_001279 | MPL16_003035               | TL2766_003111 | WCFS1_001504 |
| OG0001679 | CRL1506_002741 | CRL681_001281 | MPL16_003033               | TL2766_003113 | WCFS1_001506 |
| OG0002739 | CRL1506_000401 |               |                            | TL2766_002565 | WCFS1_001508 |
| OG0001678 | CRL1506_002740 | CRL681_001282 | MPL16_003032               | TL2766_003114 | WCFS1_001509 |
| OG0001677 | CRL1506_002739 | CRL681_001283 | MPL16_003031               | TL2766_003115 | WCFS1_001510 |
| OG0001746 | CRL1506_002738 | CRL681_001284 | MPL16_003030               | TL2766_003116 | WCFS1_001511 |
| OG0001676 | CRL1506_002737 | CRL681_001285 | MPL16_003029               | TL2766_003117 | WCFS1_001512 |
| OG0001745 | CRL1506_002735 | CRL681_001287 | MPL16_003027               | TL2766_003119 | WCFS1_001514 |
| OG0001675 | CRL1506_002734 | CRL681_001288 | MPL16_003026               | TL2766_000237 | WCFS1_001515 |
| OG0001674 | CRL1506_002733 | CRL681_001289 | MPL16_003024               | TL2766_000238 | WCFS1_001516 |
| OG0000204 | CRL1506_002732 | CRL681_001290 | MPL16_000327, MPL16_003023 | TL2766_000239 | WCFS1_001517 |

|           |                                |                              |                            |                              |                            |
|-----------|--------------------------------|------------------------------|----------------------------|------------------------------|----------------------------|
| OG0001673 | CRL1506_002731                 | CRL681_001291                | MPL16_003022               | TL2766_000240                | WCFS1_001518               |
| OG0002530 | CRL1506_002730                 | CRL681_001292                |                            | TL2766_000241                | WCFS1_001519               |
| OG0001672 | CRL1506_002729                 | CRL681_001293                | MPL16_003020               | TL2766_000242                | WCFS1_001520               |
| OG0001671 | CRL1506_002728                 | CRL681_001294                | MPL16_003019               | TL2766_000243                | WCFS1_001521               |
| OG0001670 | CRL1506_002727                 | CRL681_001295                | MPL16_003018               | TL2766_000244                | WCFS1_001522               |
| OG0001669 | CRL1506_002726                 | CRL681_001296                | MPL16_003017               | TL2766_000245                | WCFS1_001523               |
| OG0001668 | CRL1506_002725                 | CRL681_001297                | MPL16_003016               | TL2766_000246                | WCFS1_001524               |
| OG0001744 | CRL1506_002724                 | CRL681_001298                | MPL16_003015               | TL2766_000247                | WCFS1_001525               |
| OG0000041 | CRL1506_000194, CRL1506_002723 | CRL681_000384, CRL681_001299 | MPL16_001343, MPL16_003014 | TL2766_000248, TL2766_002361 | WCFS1_001526, WCFS1_002304 |
| OG0001667 | CRL1506_002722                 | CRL681_001300                | MPL16_003013               | TL2766_000249                | WCFS1_001527               |
| OG0001666 | CRL1506_002721                 | CRL681_001301                | MPL16_003012               | TL2766_000250                | WCFS1_001528               |
| OG0001665 | CRL1506_002719                 | CRL681_001302                | MPL16_003010               | TL2766_000252                | WCFS1_001529               |
| OG0001664 | CRL1506_002718                 | CRL681_001303                | MPL16_003009               | TL2766_000253                | WCFS1_001530               |
| OG0001663 | CRL1506_002717                 | CRL681_001304                | MPL16_003008               | TL2766_000254                | WCFS1_001531               |
| OG0001662 | CRL1506_002716                 | CRL681_001305                | MPL16_003007               | TL2766_000255                | WCFS1_001532               |
| OG0001661 | CRL1506_002715                 | CRL681_001306                | MPL16_003006               | TL2766_000256                | WCFS1_001533               |
| OG0001660 | CRL1506_002714                 | CRL681_001307                | MPL16_003005               | TL2766_000257                | WCFS1_001534               |
| OG0000095 | CRL1506_002713                 | CRL681_001308, CRL681_003187 | MPL16_000810, MPL16_003004 | TL2766_000258                | WCFS1_001535               |
| OG0002529 | CRL1506_002712                 | CRL681_001309                |                            | TL2766_000259                | WCFS1_001536               |
| OG0001659 | CRL1506_002711                 | CRL681_001310                | MPL16_003002               | TL2766_000260                | WCFS1_001537               |
| OG0001658 | CRL1506_002710                 | CRL681_001311                | MPL16_003001               | TL2766_000261                | WCFS1_001538               |
| OG0001657 | CRL1506_002709                 | CRL681_001312                | MPL16_003000               | TL2766_000262                | WCFS1_001539               |
| OG0001656 | CRL1506_002708                 | CRL681_001313                | MPL16_002999               | TL2766_000263                | WCFS1_001540               |
| OG0001655 | CRL1506_002707                 | CRL681_001314                | MPL16_002998               | TL2766_000264                | WCFS1_001541               |
| OG0001654 | CRL1506_002706                 | CRL681_001315                | MPL16_002997               | TL2766_000265                | WCFS1_001542               |
| OG0001653 | CRL1506_002705                 | CRL681_001316                | MPL16_002996               | TL2766_000266                | WCFS1_001543               |
| OG0002528 | CRL1506_002704                 | CRL681_001317                |                            | TL2766_000267                | WCFS1_001544               |
| OG0001652 | CRL1506_002703                 | CRL681_001318                | MPL16_002994               | TL2766_000268                | WCFS1_001545               |
| OG0001651 | CRL1506_002702                 | CRL681_001319                | MPL16_002993               | TL2766_000269                | WCFS1_001546               |
| OG0001650 | CRL1506_002701                 | CRL681_001320                | MPL16_002992               | TL2766_000270                | WCFS1_001547               |
| OG0002527 | CRL1506_002700                 |                              | MPL16_002991               | TL2766_000271                | WCFS1_001548               |
| OG0001649 | CRL1506_002699                 | CRL681_001322                | MPL16_002990               | TL2766_000272                | WCFS1_001549               |

|           |                                |                              |                            |                              |                            |
|-----------|--------------------------------|------------------------------|----------------------------|------------------------------|----------------------------|
| OG0001648 | CRL1506_002698                 | CRL681_001323                | MPL16_002989               | TL2766_000273                | WCFS1_001550               |
| OG0000360 | CRL1506_000834                 | CRL681_001324                | MPL16_002988               | TL2766_000274                | WCFS1_001551               |
| OG0000359 | CRL1506_000833                 | CRL681_001325                | MPL16_002987               | TL2766_000275                | WCFS1_001552               |
| OG0000358 | CRL1506_000832                 | CRL681_001326                | MPL16_002986               | TL2766_000276                | WCFS1_001553               |
| OG0000357 | CRL1506_000831                 | CRL681_001327                | MPL16_002985               | TL2766_000277                | WCFS1_001554               |
| OG0000361 | CRL1506_000830                 | CRL681_001224                | MPL16_002984               | TL2766_000278                | WCFS1_001555               |
| OG0000356 | CRL1506_000829                 | CRL681_001223                | MPL16_002983               | TL2766_000279                | WCFS1_001556               |
| OG0000355 | CRL1506_000828                 | CRL681_001222                | MPL16_002982               | TL2766_000280                | WCFS1_001557               |
| OG0000354 | CRL1506_000827                 | CRL681_001221                | MPL16_002981               | TL2766_000281                | WCFS1_001558               |
| OG0000353 | CRL1506_000826                 | CRL681_001220                | MPL16_002980               | TL2766_000282                | WCFS1_001559               |
| OG0000352 | CRL1506_000825                 | CRL681_001219                |                            | TL2766_000283, TL2766_001574 | WCFS1_001560               |
| OG0002674 | CRL1506_000824                 | CRL681_001218                |                            |                              | WCFS1_001561               |
| OG0000351 | CRL1506_000823                 | CRL681_001217                | MPL16_002979               | TL2766_002659                | WCFS1_001562               |
| OG0000350 | CRL1506_000822                 | CRL681_001216                | MPL16_002978               | TL2766_002660                | WCFS1_001563               |
| OG0000349 | CRL1506_000821                 | CRL681_001215                | MPL16_002977               | TL2766_002661                | WCFS1_001564               |
| OG0000348 | CRL1506_000820                 | CRL681_001213                | MPL16_002976               | TL2766_002662                | WCFS1_001565               |
| OG0000347 | CRL1506_000819                 | CRL681_001212                | MPL16_002975               | TL2766_002663                | WCFS1_001566               |
| OG0000021 | CRL1506_000818, CRL1506_000964 | CRL681_001087, CRL681_001211 | MPL16_000137, MPL16_002974 | TL2766_000981, TL2766_002664 | WCFS1_001567, WCFS1_001690 |
| OG0000346 | CRL1506_000817                 | CRL681_001210                | MPL16_002973               | TL2766_002665                | WCFS1_001568               |
| OG0000345 | CRL1506_000816                 | CRL681_001209                | MPL16_002972               | TL2766_002666                | WCFS1_001569               |
| OG0000344 | CRL1506_000815                 | CRL681_001208                | MPL16_002971               | TL2766_002667                | WCFS1_001570               |
| OG0000343 | CRL1506_000814                 | CRL681_001207                | MPL16_002970               | TL2766_002668                | WCFS1_001571               |
| OG0000342 | CRL1506_000813                 | CRL681_001206                | MPL16_002969               | TL2766_002669                | WCFS1_001572               |
| OG0000341 | CRL1506_000812                 | CRL681_001205                | MPL16_002968               | TL2766_002670                | WCFS1_001573               |
| OG0000340 | CRL1506_000811                 | CRL681_001204                | MPL16_002967               | TL2766_002671                | WCFS1_001574               |
| OG0000339 | CRL1506_000810                 | CRL681_001203                | MPL16_002966               | TL2766_002672                | WCFS1_001575               |
| OG0000338 | CRL1506_000809                 | CRL681_001202                | MPL16_002965               | TL2766_002673                | WCFS1_001576               |
| OG0000337 | CRL1506_000808                 | CRL681_001201                | MPL16_002964               | TL2766_002674                | WCFS1_001577               |
| OG0000336 | CRL1506_000807                 | CRL681_001200                | MPL16_002963               | TL2766_002675                | WCFS1_001578               |
| OG0000335 | CRL1506_000806                 | CRL681_001199                | MPL16_002962               | TL2766_002676                | WCFS1_001579               |
| OG0000334 | CRL1506_000805                 | CRL681_001198                | MPL16_002961               | TL2766_002677                | WCFS1_001580               |
| OG0000333 | CRL1506_000804                 | CRL681_001197                | MPL16_002960               | TL2766_002678                | WCFS1_001581               |

|           |                |               |              |               |              |
|-----------|----------------|---------------|--------------|---------------|--------------|
| OG0000332 | CRL1506_000803 | CRL681_001196 | MPL16_002959 | TL2766_002679 | WCFS1_001582 |
| OG0000331 | CRL1506_000802 | CRL681_001195 | MPL16_002958 | TL2766_002680 | WCFS1_001583 |
| OG0000330 | CRL1506_000801 | CRL681_001194 | MPL16_002957 | TL2766_002681 | WCFS1_001584 |
| OG0003050 |                |               |              | TL2766_002682 | WCFS1_001585 |
| OG0000329 | CRL1506_000800 | CRL681_001193 | MPL16_000234 | TL2766_002683 | WCFS1_001586 |
| OG0000328 | CRL1506_000799 | CRL681_001192 | MPL16_000233 | TL2766_002684 | WCFS1_001587 |
| OG0000327 | CRL1506_000798 | CRL681_001191 | MPL16_000232 | TL2766_002685 | WCFS1_001588 |
| OG0000531 | CRL1506_001055 | CRL681_001190 | MPL16_000231 | TL2766_002686 | WCFS1_001589 |
| OG0000530 | CRL1506_001054 | CRL681_001189 | MPL16_000230 | TL2766_002687 | WCFS1_001590 |
| OG0000529 | CRL1506_001053 | CRL681_001188 | MPL16_000229 | TL2766_002688 | WCFS1_001591 |
| OG0000528 | CRL1506_001052 | CRL681_001187 | MPL16_000228 | TL2766_002689 | WCFS1_001592 |
| OG0000527 | CRL1506_001051 | CRL681_001186 | MPL16_000227 | TL2766_002690 | WCFS1_001593 |
| OG0000526 | CRL1506_001050 | CRL681_001185 | MPL16_000226 | TL2766_002691 | WCFS1_001594 |
| OG0000525 | CRL1506_001049 | CRL681_001184 | MPL16_000225 | TL2766_002692 | WCFS1_001595 |
| OG0000524 | CRL1506_001048 | CRL681_001183 | MPL16_000224 | TL2766_002693 | WCFS1_001596 |
| OG0000523 | CRL1506_001047 | CRL681_001182 | MPL16_000223 | TL2766_002694 | WCFS1_001597 |
| OG0000522 | CRL1506_001046 | CRL681_001181 | MPL16_000222 | TL2766_002695 | WCFS1_001598 |
| OG0000521 | CRL1506_001045 | CRL681_001180 | MPL16_000221 | TL2766_002696 | WCFS1_001599 |
| OG0000520 | CRL1506_001044 | CRL681_001179 | MPL16_000220 | TL2766_002697 | WCFS1_001600 |
| OG0000519 | CRL1506_001043 | CRL681_001178 | MPL16_000219 | TL2766_002698 | WCFS1_001601 |
| OG0000518 | CRL1506_001042 | CRL681_001177 | MPL16_000218 | TL2766_002699 | WCFS1_001602 |
| OG0000517 | CRL1506_001041 | CRL681_001176 | MPL16_000217 | TL2766_002700 | WCFS1_001603 |
| OG0000516 | CRL1506_001040 | CRL681_001175 | MPL16_000216 | TL2766_002701 | WCFS1_001604 |
| OG0000515 | CRL1506_001039 | CRL681_001174 | MPL16_000215 | TL2766_002702 | WCFS1_001605 |
| OG0000514 | CRL1506_001038 | CRL681_001173 | MPL16_000214 | TL2766_002703 | WCFS1_001606 |
| OG0000513 | CRL1506_001037 | CRL681_001172 | MPL16_000213 | TL2766_002704 | WCFS1_001607 |
| OG0000512 | CRL1506_001036 | CRL681_001171 | MPL16_000212 | TL2766_002705 | WCFS1_001608 |
| OG0000511 | CRL1506_001035 | CRL681_001170 | MPL16_000211 | TL2766_002706 | WCFS1_001609 |
| OG0000510 | CRL1506_001034 | CRL681_001169 | MPL16_000210 | TL2766_002707 | WCFS1_001610 |
| OG0000509 | CRL1506_001033 | CRL681_001168 | MPL16_000209 | TL2766_002708 | WCFS1_001611 |
| OG0000508 | CRL1506_001032 | CRL681_001167 | MPL16_000208 | TL2766_002709 | WCFS1_001612 |
| OG0000507 | CRL1506_001031 | CRL681_001166 | MPL16_000207 | TL2766_002710 | WCFS1_001613 |
| OG0001013 | CRL1506_001030 | CRL681_001165 | MPL16_000206 | TL2766_002711 | WCFS1_001614 |
| OG0000506 | CRL1506_001029 | CRL681_001164 | MPL16_000205 | TL2766_002712 | WCFS1_001615 |

|           |                                |                              |                            |                              |                            |
|-----------|--------------------------------|------------------------------|----------------------------|------------------------------|----------------------------|
| OG0000505 | CRL1506_001028                 | CRL681_001163                | MPL16_000204               | TL2766_002713                | WCFS1_001616               |
| OG0000504 | CRL1506_001027                 | CRL681_001162                | MPL16_000203               | TL2766_002815                | WCFS1_001617               |
| OG0000503 | CRL1506_001026                 | CRL681_001161                | MPL16_000202               | TL2766_002814                | WCFS1_001618               |
| OG0000502 | CRL1506_001025                 | CRL681_001160                | MPL16_000201               | TL2766_002813                | WCFS1_001619               |
| OG0000501 | CRL1506_001024                 | CRL681_001159                | MPL16_000200               | TL2766_002812                | WCFS1_001620               |
| OG0000537 | CRL1506_001064                 | CRL681_001158                | MPL16_000199               | TL2766_002811                | WCFS1_001621               |
| OG0000127 | CRL1506_001063                 | CRL681_001157                | MPL16_000198               | TL2766_002761, TL2766_002810 | WCFS1_001622               |
| OG0000536 | CRL1506_001062                 | CRL681_001156                | MPL16_000197               | TL2766_002809                | WCFS1_001623               |
| OG0000535 | CRL1506_001061                 | CRL681_001155                | MPL16_000196               | TL2766_002808                | WCFS1_001624               |
| OG0000534 | CRL1506_001060                 | CRL681_001154                | MPL16_000195               | TL2766_002807                | WCFS1_001625               |
| OG0000533 | CRL1506_001059                 | CRL681_001153                | MPL16_000194               | TL2766_002806                | WCFS1_001626               |
| OG0000532 | CRL1506_001058                 | CRL681_001152                | MPL16_000193               | TL2766_002805                | WCFS1_001627               |
| OG0000126 | CRL1506_001057                 | CRL681_001151                | MPL16_000192, MPL16_001279 | TL2766_002804                | WCFS1_001628               |
| OG0000500 | CRL1506_001022                 | CRL681_001150                | MPL16_000191               | TL2766_002803                | WCFS1_001629               |
| OG0002367 | CRL1506_001021                 | CRL681_001149                |                            | TL2766_002802                | WCFS1_001630               |
| OG0002366 | CRL1506_001020                 | CRL681_001148                |                            | TL2766_002801                | WCFS1_001631               |
| OG0000499 | CRL1506_001019                 | CRL681_001147                | MPL16_000190               | TL2766_002800                | WCFS1_001632               |
| OG0001012 | CRL1506_001018                 | CRL681_001146                | MPL16_000186               | TL2766_002799                | WCFS1_001633               |
| OG0002633 |                                | CRL681_001145                | MPL16_000185               | TL2766_002798                | WCFS1_001634               |
| OG0000498 | CRL1506_001016                 | CRL681_001144                | MPL16_001491               | TL2766_002797                | WCFS1_001635               |
| OG0002365 | CRL1506_001015                 | CRL681_001143                |                            | TL2766_002796                | WCFS1_001636               |
| OG0000125 | CRL1506_001014                 | CRL681_001142                | MPL16_000184               | TL2766_002452, TL2766_002795 | WCFS1_001637               |
| OG0000497 | CRL1506_001013                 | CRL681_001141                | MPL16_000183               | TL2766_002794                | WCFS1_001638               |
| OG0000496 | CRL1506_001012                 | CRL681_001140                | MPL16_000182               | TL2766_002793                | WCFS1_001639               |
| OG0000495 | CRL1506_001011                 | CRL681_001139                | MPL16_000181               | TL2766_002792                | WCFS1_001640               |
| OG0000494 | CRL1506_001010                 | CRL681_001138                | MPL16_000180               | TL2766_002791                | WCFS1_001641               |
| OG0000493 | CRL1506_001009                 | CRL681_001137                | MPL16_000179               | TL2766_002790                | WCFS1_001642               |
| OG0000024 | CRL1506_001008, CRL1506_002497 | CRL681_001136, CRL681_002972 | MPL16_000178, MPL16_003108 | TL2766_001807, TL2766_002789 | WCFS1_001643, WCFS1_003015 |
| OG0000492 | CRL1506_001007                 | CRL681_001135                | MPL16_000177               | TL2766_002788                | WCFS1_001644               |
| OG0002364 | CRL1506_001006                 | CRL681_001134                |                            | TL2766_002787                | WCFS1_001645               |

|           |                |                              |                                          |               |              |
|-----------|----------------|------------------------------|------------------------------------------|---------------|--------------|
| OG0002363 | CRL1506_001005 | CRL681_001133                |                                          | TL2766_002786 | WCFS1_001646 |
| OG0002362 | CRL1506_001004 | CRL681_001127                |                                          | TL2766_002785 | WCFS1_001647 |
| OG0002361 | CRL1506_001003 | CRL681_001126                |                                          | TL2766_002784 | WCFS1_001648 |
| OG0002360 | CRL1506_001002 | CRL681_001125                |                                          | TL2766_002783 | WCFS1_001649 |
| OG0000491 | CRL1506_001001 | CRL681_001124                | MPL16_000175                             | TL2766_002782 | WCFS1_001650 |
| OG0000074 | CRL1506_001000 | CRL681_001123, CRL681_001915 | MPL16_000174, MPL16_001094               | TL2766_002781 | WCFS1_001651 |
| OG0000124 | CRL1506_000999 | CRL681_001122, CRL681_001916 | MPL16_000173                             | TL2766_002780 | WCFS1_001652 |
| OG0000057 | CRL1506_000998 | CRL681_001121, CRL681_001918 | MPL16_000172, MPL16_001095, MPL16_001218 | TL2766_002779 | WCFS1_001653 |
| OG0000490 | CRL1506_000997 | CRL681_001120                | MPL16_000171                             | TL2766_002778 | WCFS1_001654 |
| OG0002359 | CRL1506_000996 | CRL681_001119                |                                          | TL2766_002777 | WCFS1_001655 |
| OG0000489 | CRL1506_000994 | CRL681_001117                | MPL16_000169                             | TL2766_002775 | WCFS1_001657 |
| OG0000488 | CRL1506_000993 | CRL681_001116                | MPL16_000168                             | TL2766_002774 | WCFS1_001658 |
| OG0000487 | CRL1506_000992 | CRL681_001115                | MPL16_000167                             | TL2766_002773 | WCFS1_001659 |
| OG0000486 | CRL1506_000991 | CRL681_001114                | MPL16_000166                             | TL2766_002772 | WCFS1_001660 |
| OG0000485 | CRL1506_000990 | CRL681_001113                | MPL16_000165                             | TL2766_002771 | WCFS1_001661 |
| OG0000484 | CRL1506_000989 | CRL681_001112                | MPL16_000164                             | TL2766_002770 | WCFS1_001662 |
| OG0000483 | CRL1506_000988 | CRL681_001111                | MPL16_000163                             | TL2766_002769 | WCFS1_001663 |
| OG0000482 | CRL1506_000987 | CRL681_001110                | MPL16_000162                             | TL2766_002768 | WCFS1_001664 |
| OG0003051 |                |                              |                                          | TL2766_002767 | WCFS1_001665 |
| OG0002802 |                |                              | MPL16_000161                             | TL2766_002766 | WCFS1_001666 |
| OG0002801 |                |                              | MPL16_000160                             | TL2766_000958 | WCFS1_001667 |
| OG0000481 | CRL1506_000986 | CRL681_001109                | MPL16_000159                             | TL2766_000959 | WCFS1_001668 |
| OG0000480 | CRL1506_000985 | CRL681_001108                | MPL16_000158                             | TL2766_000960 | WCFS1_001669 |
| OG0000479 | CRL1506_000984 | CRL681_001107                | MPL16_000157                             | TL2766_000961 | WCFS1_001670 |
| OG0000478 | CRL1506_000983 | CRL681_001106                | MPL16_000156                             | TL2766_000962 | WCFS1_001671 |
| OG0000477 | CRL1506_000982 | CRL681_001105                | MPL16_000155                             | TL2766_000963 | WCFS1_001672 |
| OG0000476 | CRL1506_000981 | CRL681_001104                | MPL16_000154                             | TL2766_000964 | WCFS1_001673 |
| OG0000475 | CRL1506_000980 | CRL681_001103                | MPL16_000153                             | TL2766_000965 | WCFS1_001674 |
| OG0000474 | CRL1506_000979 | CRL681_001102                | MPL16_000152                             | TL2766_000966 | WCFS1_001675 |
| OG0000473 | CRL1506_000978 | CRL681_001101                | MPL16_000151                             | TL2766_000967 | WCFS1_001676 |

|           |                                                |               |                            |               |              |
|-----------|------------------------------------------------|---------------|----------------------------|---------------|--------------|
| OG0000472 | CRL1506_000977                                 | CRL681_001100 | MPL16_000150               | TL2766_000968 | WCFS1_001677 |
| OG0001011 | CRL1506_000976                                 | CRL681_001099 | MPL16_000149               | TL2766_000969 | WCFS1_001678 |
| OG0000471 | CRL1506_000975                                 | CRL681_001098 | MPL16_000148               | TL2766_000970 | WCFS1_001679 |
| OG0000470 | CRL1506_000974                                 | CRL681_001097 | MPL16_000147               | TL2766_000971 | WCFS1_001680 |
| OG0000469 | CRL1506_000973                                 | CRL681_001096 | MPL16_000146               | TL2766_000972 | WCFS1_001681 |
| OG0000468 | CRL1506_000972                                 | CRL681_001095 | MPL16_000145               | TL2766_000973 | WCFS1_001682 |
| OG0000467 | CRL1506_000971                                 | CRL681_001094 | MPL16_000144               | TL2766_000974 | WCFS1_001683 |
| OG0000466 | CRL1506_000970                                 | CRL681_001093 | MPL16_000143               | TL2766_000975 | WCFS1_001684 |
| OG0000465 | CRL1506_000969                                 | CRL681_001092 | MPL16_000142               | TL2766_000976 | WCFS1_001685 |
| OG0002358 | CRL1506_000968                                 | CRL681_001091 | MPL16_000141               |               | WCFS1_001686 |
| OG0000464 | CRL1506_000967                                 | CRL681_001090 | MPL16_000140               | TL2766_000978 | WCFS1_001687 |
| OG0000463 | CRL1506_000966                                 | CRL681_001089 | MPL16_000139               | TL2766_000979 | WCFS1_001688 |
| OG0000462 | CRL1506_000965                                 | CRL681_001088 | MPL16_000138               | TL2766_000980 | WCFS1_001689 |
| OG0000461 | CRL1506_000963                                 | CRL681_001086 | MPL16_000136               | TL2766_000982 | WCFS1_001691 |
| OG0000460 | CRL1506_000962                                 | CRL681_001085 | MPL16_000135               | TL2766_000983 | WCFS1_001692 |
| OG0000459 | CRL1506_000961                                 | CRL681_001084 | MPL16_000134               | TL2766_000984 | WCFS1_001693 |
| OG0000458 | CRL1506_000960                                 | CRL681_001083 | MPL16_000133               | TL2766_000985 | WCFS1_001694 |
| OG0000457 | CRL1506_000959                                 | CRL681_001082 | MPL16_000132               | TL2766_000986 | WCFS1_001695 |
| OG0000456 | CRL1506_000958                                 | CRL681_001081 | MPL16_000131               | TL2766_000987 | WCFS1_001696 |
| OG0000455 | CRL1506_000957                                 | CRL681_001080 | MPL16_000130               | TL2766_000988 | WCFS1_001697 |
| OG0000454 | CRL1506_000956                                 | CRL681_001079 | MPL16_000129               | TL2766_000989 | WCFS1_001698 |
| OG0000453 | CRL1506_000955                                 | CRL681_001078 | MPL16_000128               | TL2766_000990 | WCFS1_001699 |
| OG0000452 | CRL1506_000954                                 | CRL681_001077 | MPL16_000127               | TL2766_000991 | WCFS1_001700 |
| OG0000451 | CRL1506_000953                                 | CRL681_001076 | MPL16_000126               | TL2766_000992 | WCFS1_001701 |
| OG0000450 | CRL1506_000952                                 | CRL681_001075 | MPL16_000125               | TL2766_000993 | WCFS1_001702 |
| OG0000449 | CRL1506_000951                                 | CRL681_001074 | MPL16_000124               | TL2766_000994 | WCFS1_001703 |
| OG0002533 | CRL1506_002793, CRL1506_002799, CRL1506_002802 |               |                            |               | WCFS1_001706 |
| OG0003450 |                                                |               |                            |               | WCFS1_001707 |
| OG0002625 |                                                | CRL681_000471 | MPL16_000253, MPL16_000338 |               | WCFS1_001708 |
| OG0003451 |                                                |               |                            |               | WCFS1_001709 |
| OG0002857 | CRL1506_002831                                 |               |                            |               | WCFS1_001710 |

|           |                |               |                            |               |                                             |
|-----------|----------------|---------------|----------------------------|---------------|---------------------------------------------|
| OG0003452 |                |               |                            |               | WCFS1_001711                                |
| OG0000122 | CRL1506_000901 | CRL681_001023 |                            | TL2766_001047 | WCFS1_001715, WCFS1_001716,<br>WCFS1_001768 |
| OG0000448 | CRL1506_000950 | CRL681_001073 | MPL16_000123               | TL2766_000998 | WCFS1_001718                                |
| OG0000447 | CRL1506_000949 | CRL681_001072 | MPL16_000122               | TL2766_000999 | WCFS1_001719                                |
| OG0000446 | CRL1506_000947 | CRL681_001070 | MPL16_000120               | TL2766_001001 | WCFS1_001721                                |
| OG0000445 | CRL1506_000946 | CRL681_001069 | MPL16_000119               | TL2766_001002 | WCFS1_001722                                |
| OG0000444 | CRL1506_000945 | CRL681_001068 | MPL16_000118               | TL2766_001003 | WCFS1_001723                                |
| OG0000443 | CRL1506_000944 | CRL681_001067 | MPL16_000117               | TL2766_001004 | WCFS1_001724                                |
| OG0000442 | CRL1506_000943 | CRL681_001066 | MPL16_000116               | TL2766_001005 | WCFS1_001726                                |
| OG0000441 | CRL1506_000942 | CRL681_001065 | MPL16_000115               | TL2766_001006 | WCFS1_001727                                |
| OG0001010 | CRL1506_000941 | CRL681_001064 | MPL16_000114               | TL2766_001007 | WCFS1_001728                                |
| OG0001009 | CRL1506_000940 | CRL681_001063 | MPL16_000113               | TL2766_001008 | WCFS1_001729                                |
| OG0000440 | CRL1506_000939 | CRL681_001062 | MPL16_000112               | TL2766_001009 | WCFS1_001730                                |
| OG0000439 | CRL1506_000938 | CRL681_001061 | MPL16_000111               | TL2766_001010 | WCFS1_001731                                |
| OG0000438 | CRL1506_000937 | CRL681_001060 | MPL16_000110               | TL2766_001011 | WCFS1_001732                                |
| OG0000437 | CRL1506_000936 | CRL681_001059 | MPL16_000109               | TL2766_001012 | WCFS1_001733                                |
| OG0000436 | CRL1506_000935 | CRL681_001058 | MPL16_000108               | TL2766_001013 | WCFS1_001734                                |
| OG0000435 | CRL1506_000934 | CRL681_001057 | MPL16_000107               | TL2766_001014 | WCFS1_001735                                |
| OG0000434 | CRL1506_000933 | CRL681_001056 | MPL16_000106               | TL2766_001015 | WCFS1_001736                                |
| OG0000433 | CRL1506_000932 | CRL681_001055 | MPL16_000105               | TL2766_001016 | WCFS1_001737                                |
| OG0000123 | CRL1506_000931 | CRL681_001054 | MPL16_000104, MPL16_000291 | TL2766_001017 | WCFS1_001738                                |
| OG0000432 | CRL1506_000930 | CRL681_001053 | MPL16_002527               | TL2766_001018 | WCFS1_001739                                |
| OG0000431 | CRL1506_000929 | CRL681_001052 | MPL16_002526               | TL2766_001019 | WCFS1_001740                                |
| OG0000430 | CRL1506_000928 | CRL681_001051 | MPL16_002525               | TL2766_001020 | WCFS1_001741                                |
| OG0000429 | CRL1506_000927 | CRL681_001050 | MPL16_002524               | TL2766_001021 | WCFS1_001742                                |
| OG0000428 | CRL1506_000926 | CRL681_001049 | MPL16_002523               | TL2766_001022 | WCFS1_001743                                |
| OG0000427 | CRL1506_000925 | CRL681_001048 | MPL16_002522               | TL2766_001023 | WCFS1_001744                                |
| OG0000426 | CRL1506_000924 | CRL681_001047 | MPL16_002521               | TL2766_001024 | WCFS1_001745                                |
| OG0000425 | CRL1506_000923 | CRL681_001046 | MPL16_002520               | TL2766_001025 | WCFS1_001746                                |
| OG0000424 | CRL1506_000922 | CRL681_001045 | MPL16_002519               | TL2766_001026 | WCFS1_001747                                |
| OG0000423 | CRL1506_000921 | CRL681_001044 | MPL16_002518               | TL2766_001027 | WCFS1_001748                                |



|           |                |               |              |               |              |
|-----------|----------------|---------------|--------------|---------------|--------------|
| OG0000422 | CRL1506_000920 | CRL681_001043 | MPL16_002517 | TL2766_001028 | WCFS1_001749 |
| OG0000421 | CRL1506_000919 | CRL681_001042 | MPL16_002516 | TL2766_001029 | WCFS1_001750 |
| OG0000420 | CRL1506_000918 | CRL681_001041 | MPL16_002515 | TL2766_001030 | WCFS1_001751 |
| OG0000419 | CRL1506_000917 | CRL681_001040 | MPL16_002514 | TL2766_001031 | WCFS1_001752 |
| OG0000418 | CRL1506_000916 | CRL681_001039 | MPL16_002513 | TL2766_001032 | WCFS1_001753 |
| OG0000417 | CRL1506_000915 | CRL681_001038 | MPL16_002512 | TL2766_001033 | WCFS1_001754 |
| OG0000416 | CRL1506_000914 | CRL681_001037 | MPL16_002511 | TL2766_001034 | WCFS1_001755 |
| OG0000415 | CRL1506_000913 | CRL681_001036 | MPL16_002510 | TL2766_001035 | WCFS1_001756 |
| OG0000414 | CRL1506_000912 | CRL681_001035 | MPL16_002509 | TL2766_001036 | WCFS1_001757 |
| OG0000413 | CRL1506_000911 | CRL681_001034 | MPL16_002508 | TL2766_001037 | WCFS1_001758 |
| OG0000412 | CRL1506_000910 | CRL681_001033 | MPL16_000060 | TL2766_001038 | WCFS1_001759 |
| OG0000411 | CRL1506_000909 | CRL681_001032 | MPL16_000059 | TL2766_001039 | WCFS1_001760 |
| OG0000410 | CRL1506_000908 | CRL681_001031 | MPL16_000058 | TL2766_001040 | WCFS1_001761 |
| OG0001008 | CRL1506_000907 | CRL681_001030 | MPL16_000057 | TL2766_001041 | WCFS1_001762 |
| OG0000409 | CRL1506_000906 | CRL681_001029 | MPL16_000056 | TL2766_001042 | WCFS1_001763 |
| OG0000408 | CRL1506_000905 | CRL681_001028 | MPL16_000055 | TL2766_001043 | WCFS1_001764 |
| OG0000407 | CRL1506_000904 | CRL681_001027 | MPL16_000054 | TL2766_001044 | WCFS1_001765 |
| OG0000406 | CRL1506_000903 | CRL681_001026 | MPL16_000053 | TL2766_001045 | WCFS1_001766 |
| OG0000405 | CRL1506_000902 | CRL681_001025 | MPL16_000052 | TL2766_001046 | WCFS1_001767 |
| OG0000404 | CRL1506_000900 | CRL681_001022 | MPL16_000051 | TL2766_001048 | WCFS1_001769 |
| OG0000403 | CRL1506_000899 | CRL681_001021 | MPL16_000050 | TL2766_001049 | WCFS1_001770 |
| OG0000402 | CRL1506_000898 | CRL681_001020 | MPL16_000049 | TL2766_001050 | WCFS1_001771 |
| OG0000401 | CRL1506_000897 | CRL681_001019 | MPL16_000048 | TL2766_001051 | WCFS1_001772 |
| OG0000815 | CRL1506_001431 | CRL681_001016 | MPL16_000044 | TL2766_001107 | WCFS1_001774 |
| OG0000814 | CRL1506_001430 | CRL681_001015 | MPL16_000043 | TL2766_001108 | WCFS1_001775 |
| OG0000813 | CRL1506_001429 | CRL681_001014 | MPL16_000042 | TL2766_001109 | WCFS1_001776 |
| OG0000812 | CRL1506_001428 | CRL681_001013 | MPL16_000041 | TL2766_001110 | WCFS1_001777 |
| OG0000811 | CRL1506_001427 | CRL681_001012 | MPL16_000040 | TL2766_001111 | WCFS1_001778 |
| OG0000810 | CRL1506_001426 | CRL681_001011 | MPL16_000039 | TL2766_001112 | WCFS1_001779 |
| OG0000809 | CRL1506_001425 | CRL681_001010 | MPL16_000038 | TL2766_001113 | WCFS1_001780 |
| OG0000808 | CRL1506_001424 | CRL681_001009 | MPL16_000037 | TL2766_001114 | WCFS1_001781 |
| OG0000807 | CRL1506_001423 | CRL681_001008 | MPL16_000036 | TL2766_001115 | WCFS1_001782 |
| OG0000806 | CRL1506_001422 | CRL681_001007 | MPL16_000035 | TL2766_001116 | WCFS1_001783 |
| OG0000805 | CRL1506_001421 | CRL681_001006 | MPL16_000034 | TL2766_001117 | WCFS1_001784 |

|           |                                |                              |                            |                              |                            |
|-----------|--------------------------------|------------------------------|----------------------------|------------------------------|----------------------------|
| OG0000804 | CRL1506_001420                 | CRL681_001005                | MPL16_000033               | TL2766_001118                | WCFS1_001785               |
| OG0000803 | CRL1506_001419                 | CRL681_001004                | MPL16_000032               | TL2766_001119                | WCFS1_001786               |
| OG0000802 | CRL1506_001418                 | CRL681_001003                | MPL16_000031               | TL2766_001120                | WCFS1_001787               |
| OG0000801 | CRL1506_001417                 | CRL681_001002                | MPL16_000030               | TL2766_001121                | WCFS1_001788               |
| OG0000800 | CRL1506_001416                 | CRL681_001001                | MPL16_000029               | TL2766_001122                | WCFS1_001789               |
| OG0000799 | CRL1506_000597, CRL1506_001415 | CRL681_001000                |                            | TL2766_001123                | WCFS1_001790               |
| OG0000147 | CRL1506_000599, CRL1506_001414 | CRL681_000999                |                            | TL2766_000773, TL2766_001124 | WCFS1_001791               |
| OG0000798 | CRL1506_000600, CRL1506_001413 | CRL681_000998                |                            | TL2766_001125                | WCFS1_001792               |
| OG0000797 | CRL1506_000601, CRL1506_001412 | CRL681_000997                |                            | TL2766_001126                | WCFS1_001793               |
| OG0002680 | CRL1506_001406                 | CRL681_000991                |                            |                              | WCFS1_001799               |
| OG0000796 | CRL1506_001405                 | CRL681_000990                | MPL16_000028               | TL2766_001133                | WCFS1_001800               |
| OG0000146 | CRL1506_001403                 | CRL681_000988                | MPL16_000026, MPL16_000506 | TL2766_001135                | WCFS1_001802               |
| OG0000795 | CRL1506_001402                 | CRL681_000987                | MPL16_000025               | TL2766_001136                | WCFS1_001803               |
| OG0000794 | CRL1506_001401                 | CRL681_000986                | MPL16_000024               | TL2766_001137                | WCFS1_001804               |
| OG0000793 | CRL1506_001400                 | CRL681_000985                | MPL16_000023               | TL2766_001138                | WCFS1_001805               |
| OG0000792 | CRL1506_001399                 | CRL681_000984                | MPL16_000022               | TL2766_001139                | WCFS1_001806               |
| OG0000791 | CRL1506_001398                 | CRL681_000983                | MPL16_000021               | TL2766_001140                | WCFS1_001807               |
| OG0000790 | CRL1506_001397                 | CRL681_000982                | MPL16_000020               | TL2766_001141                | WCFS1_001808               |
| OG0000789 | CRL1506_001396                 | CRL681_000981                | MPL16_000019               | TL2766_001142                | WCFS1_001809               |
| OG0000788 | CRL1506_001395                 | CRL681_000980                | MPL16_000018               | TL2766_001143                | WCFS1_001810               |
| OG0000787 | CRL1506_001394                 | CRL681_000979                | MPL16_000017               | TL2766_001144                | WCFS1_001811               |
| OG0000051 | CRL1506_001393                 | CRL681_000369, CRL681_000978 | MPL16_000016, MPL16_000985 | TL2766_001145, TL2766_002346 | WCFS1_001812, WCFS1_002289 |
| OG0002383 | CRL1506_001392                 | CRL681_000977                |                            | TL2766_001146                | WCFS1_001813               |
| OG0000786 | CRL1506_001391                 | CRL681_000976                | MPL16_000014               | TL2766_001147                | WCFS1_001814               |
| OG0000785 | CRL1506_001390                 | CRL681_000975                | MPL16_000013               | TL2766_001148                | WCFS1_001815               |
| OG0000784 | CRL1506_001389                 | CRL681_000974                | MPL16_000012               | TL2766_001149                | WCFS1_001816               |
| OG0002382 | CRL1506_001388                 | CRL681_000973                |                            | TL2766_001150                | WCFS1_001817               |
| OG0000783 | CRL1506_001387                 | CRL681_000972                | MPL16_000010               | TL2766_001151                | WCFS1_001818               |

|           |                |               |                                          |               |              |
|-----------|----------------|---------------|------------------------------------------|---------------|--------------|
| OG0000782 | CRL1506_001386 | CRL681_000971 | MPL16_000009                             | TL2766_001152 | WCFS1_001819 |
| OG0000781 | CRL1506_001385 | CRL681_000970 | MPL16_000008                             | TL2766_001153 | WCFS1_001820 |
| OG0000780 | CRL1506_001384 | CRL681_000969 | MPL16_000007                             | TL2766_001154 | WCFS1_001821 |
| OG0000779 | CRL1506_001383 | CRL681_000968 | MPL16_000006                             | TL2766_001155 | WCFS1_001822 |
| OG0000778 | CRL1506_001382 | CRL681_000967 | MPL16_000005                             | TL2766_001156 | WCFS1_001823 |
| OG0000777 | CRL1506_001381 | CRL681_000966 | MPL16_000004                             | TL2766_001157 | WCFS1_001824 |
| OG0000776 | CRL1506_001380 | CRL681_000965 | MPL16_000003                             | TL2766_001158 | WCFS1_001825 |
| OG0002381 | CRL1506_001379 | CRL681_000964 |                                          | TL2766_001159 | WCFS1_001826 |
| OG0000775 | CRL1506_001378 | CRL681_000963 | MPL16_003121                             | TL2766_001160 | WCFS1_001827 |
| OG0000774 | CRL1506_001377 | CRL681_000962 | MPL16_003122                             | TL2766_001161 | WCFS1_001828 |
| OG0000773 | CRL1506_001376 | CRL681_000961 | MPL16_003123                             | TL2766_001162 | WCFS1_001829 |
| OG0000772 | CRL1506_001375 | CRL681_000960 | MPL16_002505                             | TL2766_001163 | WCFS1_001830 |
| OG0000771 | CRL1506_001374 | CRL681_000959 | MPL16_002504                             | TL2766_001164 | WCFS1_001831 |
| OG0000770 | CRL1506_001373 | CRL681_000958 | MPL16_002503                             | TL2766_001165 | WCFS1_001832 |
| OG0000769 | CRL1506_001372 | CRL681_000957 | MPL16_002502                             | TL2766_001166 | WCFS1_001833 |
| OG0000075 | CRL1506_001371 | CRL681_000956 | MPL16_000377, MPL16_002115, MPL16_002501 | TL2766_001167 | WCFS1_001834 |
| OG0000768 | CRL1506_001370 | CRL681_000955 | MPL16_002500                             | TL2766_001168 | WCFS1_001835 |
| OG0000767 | CRL1506_001369 | CRL681_000954 | MPL16_002499                             | TL2766_001169 | WCFS1_001836 |
| OG0000766 | CRL1506_001368 | CRL681_000953 | MPL16_002498                             | TL2766_001170 | WCFS1_001837 |
| OG0000765 | CRL1506_001367 | CRL681_000952 | MPL16_002497                             | TL2766_001171 | WCFS1_001838 |
| OG0000764 | CRL1506_001366 | CRL681_000951 | MPL16_002496                             | TL2766_001172 | WCFS1_001839 |
| OG0000763 | CRL1506_001365 | CRL681_000950 | MPL16_002495                             | TL2766_001173 | WCFS1_001840 |
| OG0000762 | CRL1506_001364 | CRL681_000949 | MPL16_002494                             | TL2766_001174 | WCFS1_001841 |
| OG0000761 | CRL1506_001363 | CRL681_000948 | MPL16_002493                             | TL2766_001175 | WCFS1_001842 |
| OG0000760 | CRL1506_001362 | CRL681_000947 | MPL16_002492                             | TL2766_001176 | WCFS1_001843 |
| OG0000759 | CRL1506_001361 | CRL681_000946 | MPL16_002491                             | TL2766_001177 | WCFS1_001844 |
| OG0000758 | CRL1506_001359 | CRL681_000944 | MPL16_002489                             | TL2766_001179 | WCFS1_001847 |
| OG0000757 | CRL1506_001358 | CRL681_000943 | MPL16_002488                             | TL2766_001180 | WCFS1_001848 |
| OG0000756 | CRL1506_001357 | CRL681_000942 | MPL16_002487                             | TL2766_001181 | WCFS1_001849 |
| OG0000755 | CRL1506_001356 | CRL681_000941 | MPL16_002486                             | TL2766_001182 | WCFS1_001850 |
| OG0002380 | CRL1506_001355 | CRL681_000940 |                                          | TL2766_001183 | WCFS1_001851 |
| OG0000754 | CRL1506_001354 | CRL681_000939 | MPL16_002484                             | TL2766_001184 | WCFS1_001852 |

|           |                |               |              |               |              |
|-----------|----------------|---------------|--------------|---------------|--------------|
| OG0000753 | CRL1506_001353 | CRL681_000938 | MPL16_002483 | TL2766_001185 | WCFS1_001853 |
| OG0000752 | CRL1506_001352 | CRL681_000937 | MPL16_002482 | TL2766_001186 | WCFS1_001854 |
| OG0000751 | CRL1506_001351 | CRL681_000936 | MPL16_002481 | TL2766_001187 | WCFS1_001855 |
| OG0000750 | CRL1506_001350 | CRL681_000935 | MPL16_002480 | TL2766_001188 | WCFS1_001856 |
| OG0000749 | CRL1506_001349 | CRL681_000934 | MPL16_002479 | TL2766_001189 | WCFS1_001857 |
| OG0000748 | CRL1506_001348 | CRL681_000933 | MPL16_002478 | TL2766_001190 | WCFS1_001858 |
| OG0000747 | CRL1506_001347 | CRL681_000932 | MPL16_002477 | TL2766_001191 | WCFS1_001859 |
| OG0000746 | CRL1506_001346 | CRL681_000931 | MPL16_002476 | TL2766_001192 | WCFS1_001860 |
| OG0000745 | CRL1506_001345 | CRL681_000930 | MPL16_002475 | TL2766_001193 | WCFS1_001861 |
| OG0000743 | CRL1506_001340 | CRL681_000929 | MPL16_002474 | TL2766_001198 | WCFS1_001862 |
| OG0000742 | CRL1506_001339 | CRL681_000928 | MPL16_002473 | TL2766_001199 | WCFS1_001863 |
| OG0000741 | CRL1506_001338 | CRL681_000927 | MPL16_002472 | TL2766_001200 | WCFS1_001864 |
| OG0000740 | CRL1506_001337 | CRL681_000926 | MPL16_002471 | TL2766_001201 | WCFS1_001865 |
| OG0000739 | CRL1506_001336 | CRL681_000925 | MPL16_002470 | TL2766_001202 | WCFS1_001866 |
| OG0000738 | CRL1506_001335 | CRL681_000924 | MPL16_002469 | TL2766_001203 | WCFS1_001867 |
| OG0000737 | CRL1506_001334 | CRL681_000923 | MPL16_002468 | TL2766_001204 | WCFS1_001868 |
| OG0000736 | CRL1506_001333 | CRL681_000922 | MPL16_002467 | TL2766_001205 | WCFS1_001869 |
| OG0000735 | CRL1506_001332 | CRL681_000921 | MPL16_002466 | TL2766_001206 | WCFS1_001870 |
| OG0000734 | CRL1506_001331 | CRL681_000920 | MPL16_002465 | TL2766_001207 | WCFS1_001871 |
| OG0000733 | CRL1506_001330 | CRL681_000919 | MPL16_002464 | TL2766_001208 | WCFS1_001872 |
| OG0000732 | CRL1506_001329 | CRL681_000918 | MPL16_002463 | TL2766_001209 | WCFS1_001873 |
| OG0000731 | CRL1506_001328 | CRL681_000917 | MPL16_002462 | TL2766_001210 | WCFS1_001874 |
| OG0000730 | CRL1506_001327 | CRL681_000916 | MPL16_002461 | TL2766_001211 | WCFS1_001875 |
| OG0001020 | CRL1506_001326 | CRL681_000915 | MPL16_002460 | TL2766_001212 | WCFS1_001876 |
| OG0000729 | CRL1506_001325 | CRL681_000914 | MPL16_002459 | TL2766_001213 | WCFS1_001877 |
| OG0000728 | CRL1506_001324 | CRL681_000913 | MPL16_002458 | TL2766_001214 | WCFS1_001878 |
| OG0000727 | CRL1506_001323 | CRL681_000912 | MPL16_002457 | TL2766_001215 | WCFS1_001879 |
| OG0000726 | CRL1506_001322 | CRL681_000911 | MPL16_002456 | TL2766_001216 | WCFS1_001880 |
| OG0000725 | CRL1506_001321 | CRL681_000910 | MPL16_002455 | TL2766_001217 | WCFS1_001881 |
| OG0000724 | CRL1506_001320 | CRL681_000909 | MPL16_002454 | TL2766_001218 | WCFS1_001882 |
| OG0000723 | CRL1506_001319 | CRL681_001402 | MPL16_002453 | TL2766_001219 | WCFS1_001883 |
| OG0000722 | CRL1506_001318 | CRL681_001401 | MPL16_002452 | TL2766_001220 | WCFS1_001884 |
| OG0000721 | CRL1506_001317 | CRL681_001400 | MPL16_002451 | TL2766_001221 | WCFS1_001885 |
| OG0000720 | CRL1506_001316 | CRL681_001399 | MPL16_002450 | TL2766_001222 | WCFS1_001886 |

|           |                |               |              |               |              |
|-----------|----------------|---------------|--------------|---------------|--------------|
| OG0000719 | CRL1506_001315 | CRL681_001398 | MPL16_002449 | TL2766_001223 | WCFS1_001887 |
| OG0000718 | CRL1506_001314 | CRL681_001397 | MPL16_002448 | TL2766_001224 | WCFS1_001888 |
| OG0000717 | CRL1506_001313 | CRL681_001396 | MPL16_002447 | TL2766_001225 | WCFS1_001889 |
| OG0000716 | CRL1506_001312 | CRL681_001395 | MPL16_002446 | TL2766_001226 | WCFS1_001890 |
| OG0000715 | CRL1506_001311 | CRL681_001394 | MPL16_002445 | TL2766_001227 | WCFS1_001891 |
| OG0000714 | CRL1506_001310 | CRL681_001393 | MPL16_002444 | TL2766_001228 | WCFS1_001892 |
| OG0000713 | CRL1506_001309 | CRL681_001392 | MPL16_002443 | TL2766_001229 | WCFS1_001893 |
| OG0000712 | CRL1506_001308 | CRL681_001391 | MPL16_002442 | TL2766_001230 | WCFS1_001894 |
| OG0000711 | CRL1506_001307 | CRL681_001390 | MPL16_002441 | TL2766_001231 | WCFS1_001895 |
| OG0000710 | CRL1506_001306 | CRL681_001389 | MPL16_002440 | TL2766_001232 | WCFS1_001896 |
| OG0000709 | CRL1506_001305 | CRL681_001388 | MPL16_002439 | TL2766_001233 | WCFS1_001897 |
| OG0000708 | CRL1506_001304 | CRL681_001387 | MPL16_002438 | TL2766_001234 | WCFS1_001898 |
| OG0000707 | CRL1506_001303 | CRL681_001386 | MPL16_002437 | TL2766_001235 | WCFS1_001899 |
| OG0000961 | CRL1506_001660 | CRL681_000019 | MPL16_002687 | TL2766_002461 | WCFS1_001925 |
| OG0001025 | CRL1506_001661 | CRL681_000020 | MPL16_002688 | TL2766_002462 | WCFS1_001926 |
| OG0000962 | CRL1506_001662 | CRL681_000021 | MPL16_002689 | TL2766_002463 | WCFS1_001927 |
| OG0000963 | CRL1506_001663 | CRL681_000022 | MPL16_002692 | TL2766_002464 | WCFS1_001928 |
| OG0000964 | CRL1506_001664 | CRL681_000023 | MPL16_002693 | TL2766_002465 | WCFS1_001929 |
| OG0000965 | CRL1506_001665 | CRL681_000024 | MPL16_002694 | TL2766_002466 | WCFS1_001930 |
| OG0000966 | CRL1506_001666 | CRL681_000025 | MPL16_002695 | TL2766_002467 | WCFS1_001931 |
| OG0001026 | CRL1506_001667 | CRL681_000026 | MPL16_002696 | TL2766_002468 | WCFS1_001932 |
| OG0000967 | CRL1506_001668 | CRL681_000027 | MPL16_002697 | TL2766_002469 | WCFS1_001933 |
| OG0000968 | CRL1506_001669 | CRL681_000028 | MPL16_002698 | TL2766_002470 | WCFS1_001934 |
| OG0000969 | CRL1506_001670 | CRL681_000029 | MPL16_002699 | TL2766_002471 | WCFS1_001935 |
| OG0001027 | CRL1506_001671 | CRL681_000030 | MPL16_002700 | TL2766_002472 | WCFS1_001936 |
| OG0000970 | CRL1506_001672 | CRL681_000031 | MPL16_002702 | TL2766_002473 | WCFS1_001937 |
| OG0000971 | CRL1506_001673 | CRL681_000032 | MPL16_002703 | TL2766_002474 | WCFS1_001938 |
| OG0000972 | CRL1506_001674 | CRL681_000033 | MPL16_002704 | TL2766_002475 | WCFS1_001939 |
| OG0000973 | CRL1506_001675 | CRL681_000034 | MPL16_002705 | TL2766_002476 | WCFS1_001940 |
| OG0000974 | CRL1506_001676 | CRL681_000035 | MPL16_002706 | TL2766_002477 | WCFS1_001941 |
| OG0000975 | CRL1506_001677 | CRL681_000036 | MPL16_002707 | TL2766_002478 | WCFS1_001942 |
| OG0000976 | CRL1506_001678 | CRL681_000037 | MPL16_002708 | TL2766_002479 | WCFS1_001943 |
| OG0000977 | CRL1506_001679 | CRL681_000038 | MPL16_002709 | TL2766_002480 | WCFS1_001944 |
| OG0000978 | CRL1506_001680 | CRL681_000039 | MPL16_002710 | TL2766_002481 | WCFS1_001945 |

|           |                |               |                            |               |              |
|-----------|----------------|---------------|----------------------------|---------------|--------------|
| OG0000979 | CRL1506_001681 | CRL681_000040 | MPL16_002711               | TL2766_002482 | WCFS1_001946 |
| OG0000980 | CRL1506_001682 | CRL681_000041 | MPL16_002712               | TL2766_002483 | WCFS1_001947 |
| OG0000981 | CRL1506_001683 | CRL681_000042 | MPL16_002713               | TL2766_002484 | WCFS1_001948 |
| OG0000157 | CRL1506_001684 | CRL681_000043 | MPL16_000788, MPL16_002714 | TL2766_002485 | WCFS1_001949 |
| OG0000982 | CRL1506_001685 | CRL681_000044 | MPL16_002715               | TL2766_002486 | WCFS1_001950 |
| OG0000983 | CRL1506_001686 | CRL681_000045 | MPL16_002716               | TL2766_002487 | WCFS1_001951 |
| OG0000984 | CRL1506_001687 | CRL681_000046 | MPL16_002717               | TL2766_002488 | WCFS1_001952 |
| OG0000985 | CRL1506_001688 | CRL681_000047 | MPL16_002718               | TL2766_002489 | WCFS1_001953 |
| OG0000986 | CRL1506_001689 | CRL681_000048 | MPL16_002719               | TL2766_002490 | WCFS1_001954 |
| OG0000987 | CRL1506_001690 | CRL681_000049 | MPL16_002720               | TL2766_002491 | WCFS1_001955 |
| OG0000988 | CRL1506_001691 | CRL681_000050 | MPL16_002721               | TL2766_002492 | WCFS1_001956 |
| OG0000989 | CRL1506_001692 | CRL681_000051 | MPL16_002722               | TL2766_002493 | WCFS1_001957 |
| OG0000990 | CRL1506_001693 | CRL681_000052 | MPL16_002723               | TL2766_002494 | WCFS1_001958 |
| OG0002416 | CRL1506_001694 | CRL681_000053 |                            | TL2766_002495 | WCFS1_001959 |
| OG0000991 | CRL1506_001695 | CRL681_000054 | MPL16_002725               | TL2766_002496 | WCFS1_001960 |
| OG0000992 | CRL1506_001696 | CRL681_000055 | MPL16_002726               | TL2766_002497 | WCFS1_001961 |
| OG0000993 | CRL1506_001697 | CRL681_000056 | MPL16_002727               | TL2766_002498 | WCFS1_001962 |
| OG0000994 | CRL1506_001698 | CRL681_000057 | MPL16_002728               | TL2766_002499 | WCFS1_001963 |
| OG0000995 | CRL1506_001699 | CRL681_000058 | MPL16_002729               | TL2766_002500 | WCFS1_001964 |
| OG0000996 | CRL1506_001700 | CRL681_000059 | MPL16_002730               | TL2766_002501 | WCFS1_001965 |
| OG0000997 | CRL1506_001701 | CRL681_000060 | MPL16_002731               | TL2766_002502 | WCFS1_001966 |
| OG0000998 | CRL1506_001702 | CRL681_000061 | MPL16_002732               | TL2766_002503 | WCFS1_001967 |
| OG0000999 | CRL1506_001703 | CRL681_000062 | MPL16_002733               | TL2766_002504 | WCFS1_001968 |
| OG0001000 | CRL1506_001704 | CRL681_000063 | MPL16_002734               | TL2766_002505 | WCFS1_001969 |
| OG0001001 | CRL1506_001705 | CRL681_000064 | MPL16_002735               | TL2766_002506 | WCFS1_001970 |
| OG0001002 | CRL1506_001706 | CRL681_000065 | MPL16_002736               | TL2766_002507 | WCFS1_001971 |
| OG0001003 | CRL1506_001707 | CRL681_000066 | MPL16_002737               | TL2766_002508 | WCFS1_001972 |
| OG0001004 | CRL1506_001708 | CRL681_000067 | MPL16_002738               | TL2766_002509 | WCFS1_001973 |
| OG0001005 | CRL1506_001709 | CRL681_000068 | MPL16_002739               | TL2766_002510 | WCFS1_001974 |
| OG0001006 | CRL1506_001710 | CRL681_000069 | MPL16_002740               | TL2766_002511 | WCFS1_001975 |
| OG0001007 | CRL1506_001711 | CRL681_000070 | MPL16_002741               | TL2766_002512 | WCFS1_001976 |
| OG0001028 | CRL1506_001712 | CRL681_000071 | MPL16_002742               | TL2766_002513 | WCFS1_001977 |
| OG0001225 | CRL1506_002015 | CRL681_000072 | MPL16_002743               | TL2766_002514 | WCFS1_001978 |

|           |                |               |              |               |                            |
|-----------|----------------|---------------|--------------|---------------|----------------------------|
| OG0001224 | CRL1506_002014 | CRL681_000073 | MPL16_002744 | TL2766_002515 | WCFS1_001979               |
| OG0001223 | CRL1506_002013 | CRL681_000074 | MPL16_002745 | TL2766_002516 | WCFS1_001980               |
| OG0001222 | CRL1506_002012 | CRL681_000075 | MPL16_002746 | TL2766_002517 | WCFS1_001981               |
| OG0001221 | CRL1506_002011 | CRL681_000076 | MPL16_002747 | TL2766_002518 | WCFS1_001982               |
| OG0001220 | CRL1506_002010 | CRL681_000077 | MPL16_002748 | TL2766_002519 | WCFS1_001983               |
| OG0001219 | CRL1506_002009 | CRL681_000078 | MPL16_002749 | TL2766_002520 | WCFS1_001984               |
| OG0001218 | CRL1506_002008 | CRL681_000079 | MPL16_002750 | TL2766_002521 | WCFS1_001985               |
| OG0001217 | CRL1506_002007 | CRL681_000080 | MPL16_002751 | TL2766_002522 | WCFS1_001986               |
| OG0001724 | CRL1506_002006 | CRL681_000081 | MPL16_002752 | TL2766_002523 | WCFS1_001987               |
| OG0001216 | CRL1506_002005 | CRL681_000082 | MPL16_002753 | TL2766_002524 | WCFS1_001988               |
| OG0001215 | CRL1506_002004 | CRL681_000083 | MPL16_002754 | TL2766_002714 | WCFS1_001989               |
| OG0001214 | CRL1506_002003 | CRL681_000084 | MPL16_002755 | TL2766_002715 | WCFS1_001990               |
| OG0001213 | CRL1506_002002 | CRL681_000085 | MPL16_002756 | TL2766_002716 | WCFS1_001991               |
| OG0001212 | CRL1506_002001 | CRL681_000086 | MPL16_002757 | TL2766_002717 | WCFS1_001992               |
| OG0001211 | CRL1506_002000 | CRL681_000087 | MPL16_002758 | TL2766_002718 | WCFS1_001993               |
| OG0001210 | CRL1506_001999 | CRL681_000088 | MPL16_002759 | TL2766_002719 | WCFS1_001994               |
| OG0001209 | CRL1506_001998 | CRL681_000089 | MPL16_002760 | TL2766_002720 | WCFS1_001995               |
| OG0001208 | CRL1506_001997 | CRL681_000090 | MPL16_002761 | TL2766_002721 | WCFS1_001996               |
| OG0001207 | CRL1506_001996 | CRL681_000091 | MPL16_002762 | TL2766_002722 | WCFS1_001997               |
| OG0001206 | CRL1506_001995 | CRL681_000092 | MPL16_002763 | TL2766_002723 | WCFS1_001998               |
| OG0001205 | CRL1506_001994 | CRL681_000093 | MPL16_002764 | TL2766_002724 | WCFS1_001999               |
| OG0001204 | CRL1506_001993 | CRL681_000094 | MPL16_002765 | TL2766_002725 | WCFS1_002000               |
| OG0002436 | CRL1506_001992 | CRL681_000095 |              | TL2766_002726 | WCFS1_002001               |
| OG0001309 | CRL1506_002126 | CRL681_000096 | MPL16_002766 | TL2766_002727 | WCFS1_002002               |
| OG0001308 | CRL1506_002125 | CRL681_000097 | MPL16_002767 | TL2766_002728 | WCFS1_002003               |
| OG0001307 | CRL1506_002124 | CRL681_000098 | MPL16_002768 | TL2766_002729 | WCFS1_002004               |
| OG0001306 | CRL1506_002123 | CRL681_000099 | MPL16_002769 | TL2766_002730 | WCFS1_002005               |
| OG0001305 | CRL1506_002122 | CRL681_000100 | MPL16_002770 | TL2766_002731 | WCFS1_002006               |
| OG0001304 | CRL1506_002121 | CRL681_000101 | MPL16_002771 | TL2766_002732 | WCFS1_002007               |
| OG0001303 | CRL1506_002120 | CRL681_000102 | MPL16_002772 | TL2766_002733 | WCFS1_002008               |
| OG0001302 | CRL1506_002119 | CRL681_000103 | MPL16_002773 | TL2766_002734 | WCFS1_002009               |
| OG0000172 | CRL1506_002118 | CRL681_000104 | MPL16_002774 | TL2766_002735 | WCFS1_002010, WCFS1_003121 |
| OG0001301 | CRL1506_002111 | CRL681_000105 | MPL16_002775 | TL2766_002742 | WCFS1_002011               |

|           |                |               |              |               |              |
|-----------|----------------|---------------|--------------|---------------|--------------|
| OG0001300 | CRL1506_002110 | CRL681_000106 | MPL16_002776 | TL2766_002743 | WCFS1_002012 |
| OG0001299 | CRL1506_002108 | CRL681_000108 | MPL16_002778 | TL2766_002745 | WCFS1_002014 |
| OG0001726 | CRL1506_002107 | CRL681_000109 | MPL16_002779 | TL2766_002746 | WCFS1_002015 |
| OG0002438 | CRL1506_002106 | CRL681_000110 |              | TL2766_000449 | WCFS1_002016 |
| OG0001298 | CRL1506_002104 | CRL681_000112 | MPL16_002782 | TL2766_000451 | WCFS1_002018 |
| OG0001297 | CRL1506_002103 | CRL681_000113 | MPL16_002783 | TL2766_000452 | WCFS1_002019 |
| OG0001296 | CRL1506_002102 | CRL681_000114 | MPL16_002784 | TL2766_000453 | WCFS1_002020 |
| OG0001295 | CRL1506_002100 | CRL681_000116 | MPL16_002786 | TL2766_000455 | WCFS1_002022 |
| OG0001294 | CRL1506_002099 | CRL681_000117 | MPL16_002787 | TL2766_000456 | WCFS1_002023 |
| OG0001725 | CRL1506_002098 | CRL681_000118 | MPL16_002788 | TL2766_000457 | WCFS1_002024 |
| OG0001293 | CRL1506_002097 | CRL681_000119 | MPL16_002789 | TL2766_000458 | WCFS1_002025 |
| OG0001292 | CRL1506_002096 | CRL681_000120 | MPL16_002790 | TL2766_000459 | WCFS1_002026 |
| OG0001291 | CRL1506_002095 | CRL681_000121 | MPL16_002791 | TL2766_000460 | WCFS1_002027 |
| OG0001290 | CRL1506_002094 | CRL681_000122 | MPL16_002792 | TL2766_000461 | WCFS1_002028 |
| OG0001289 | CRL1506_002093 | CRL681_000123 | MPL16_002793 | TL2766_000462 | WCFS1_002029 |
| OG0001288 | CRL1506_002092 | CRL681_000124 | MPL16_002794 | TL2766_000463 | WCFS1_002030 |
| OG0001287 | CRL1506_002091 | CRL681_000125 | MPL16_002795 | TL2766_000464 | WCFS1_002031 |
| OG0001286 | CRL1506_002090 | CRL681_000126 | MPL16_002796 | TL2766_000465 | WCFS1_002032 |
| OG0001285 | CRL1506_002089 | CRL681_000127 | MPL16_002797 | TL2766_000466 | WCFS1_002033 |
| OG0001284 | CRL1506_002088 | CRL681_000128 | MPL16_002798 | TL2766_000467 | WCFS1_002034 |
| OG0001283 | CRL1506_002087 | CRL681_000129 | MPL16_002799 | TL2766_000468 | WCFS1_002035 |
| OG0001282 | CRL1506_002086 | CRL681_000130 | MPL16_002800 | TL2766_000469 | WCFS1_002036 |
| OG0001281 | CRL1506_002085 | CRL681_000131 | MPL16_002801 | TL2766_000470 | WCFS1_002037 |
| OG0001280 | CRL1506_002084 | CRL681_000132 | MPL16_002802 | TL2766_000471 | WCFS1_002038 |
| OG0001279 | CRL1506_002083 | CRL681_000133 | MPL16_002803 | TL2766_000472 | WCFS1_002039 |
| OG0001278 | CRL1506_002082 | CRL681_000134 | MPL16_002804 | TL2766_000473 | WCFS1_002040 |
| OG0001277 | CRL1506_002081 | CRL681_000135 | MPL16_002805 | TL2766_000474 | WCFS1_002041 |
| OG0001276 | CRL1506_002079 | CRL681_000137 | MPL16_002806 | TL2766_000133 | WCFS1_002043 |
| OG0001275 | CRL1506_002078 | CRL681_000138 | MPL16_002807 | TL2766_000132 | WCFS1_002044 |
| OG0001274 | CRL1506_002077 | CRL681_000139 | MPL16_002808 | TL2766_000131 | WCFS1_002045 |
| OG0001273 | CRL1506_002076 | CRL681_000140 | MPL16_002809 | TL2766_000130 | WCFS1_002046 |
| OG0001272 | CRL1506_002075 | CRL681_000141 | MPL16_002810 | TL2766_000129 | WCFS1_002047 |
| OG0001271 | CRL1506_002074 | CRL681_000142 | MPL16_002811 | TL2766_000128 | WCFS1_002048 |
| OG0001270 | CRL1506_002073 | CRL681_000143 | MPL16_002812 | TL2766_000127 | WCFS1_002049 |



|           |                |                              |                            |               |              |
|-----------|----------------|------------------------------|----------------------------|---------------|--------------|
| OG0001269 | CRL1506_002072 | CRL681_000144                | MPL16_002813               | TL2766_000126 | WCFS1_002050 |
| OG0001268 | CRL1506_002071 | CRL681_000145                | MPL16_002814               | TL2766_000125 | WCFS1_002051 |
| OG0001267 | CRL1506_002070 | CRL681_000146                | MPL16_002815               | TL2766_000124 | WCFS1_002052 |
| OG0001266 | CRL1506_002069 | CRL681_000147                | MPL16_002816               | TL2766_000123 | WCFS1_002053 |
| OG0001265 | CRL1506_002068 | CRL681_000148                | MPL16_002817               | TL2766_000122 | WCFS1_002054 |
| OG0001264 | CRL1506_002067 | CRL681_000149                | MPL16_002818               | TL2766_000121 | WCFS1_002055 |
| OG0001263 | CRL1506_002066 | CRL681_000150                | MPL16_002819               | TL2766_000120 | WCFS1_002056 |
| OG0001262 | CRL1506_002065 | CRL681_000151                | MPL16_002820               | TL2766_000119 | WCFS1_002057 |
| OG0001261 | CRL1506_002064 | CRL681_000152                | MPL16_002821               | TL2766_000118 | WCFS1_002058 |
| OG0001260 | CRL1506_002063 | CRL681_000153                | MPL16_002822               | TL2766_000117 | WCFS1_002059 |
| OG0001259 | CRL1506_002062 | CRL681_000154                | MPL16_002823               | TL2766_000116 | WCFS1_002060 |
| OG0001722 | CRL1506_002804 |                              | MPL16_001538, MPL16_002825 | TL2766_000114 | WCFS1_002061 |
| OG0003453 |                |                              |                            |               | WCFS1_002064 |
| OG0003055 |                |                              |                            | TL2766_001056 | WCFS1_002065 |
| OG0003454 |                |                              |                            |               | WCFS1_002066 |
| OG0003031 |                |                              | MPL16_002833               |               | WCFS1_002067 |
| OG0002706 | CRL1506_001873 |                              | MPL16_002834               |               | WCFS1_002068 |
| OG0003455 |                |                              |                            |               | WCFS1_002069 |
| OG0003456 |                |                              |                            |               | WCFS1_002084 |
| OG0003457 |                |                              |                            |               | WCFS1_002088 |
| OG0003458 |                |                              |                            |               | WCFS1_002089 |
| OG0002866 | CRL1506_002913 |                              |                            |               | WCFS1_002090 |
| OG0000099 | CRL1506_002917 | CRL681_000190, CRL681_000672 | MPL16_001568, MPL16_002862 | TL2766_000082 | WCFS1_002092 |
| OG0002619 |                | CRL681_000193                | MPL16_002863               | TL2766_000081 | WCFS1_002093 |
| OG0002556 | CRL1506_002923 | CRL681_000667                | MPL16_001575               |               | WCFS1_002098 |
| OG0002557 | CRL1506_002924 | CRL681_000666                | MPL16_001576               |               | WCFS1_002099 |
| OG0002869 | CRL1506_002925 |                              |                            |               | WCFS1_002100 |
| OG0003459 |                |                              |                            |               | WCFS1_002101 |
| OG0002297 | CRL1506_000704 | CRL681_000200                | MPL16_002870               | TL2766_000072 | WCFS1_002102 |
| OG0002621 |                | CRL681_000201                | MPL16_002871               | TL2766_000071 | WCFS1_002103 |
| OG0002808 |                |                              | MPL16_002872               | TL2766_000070 | WCFS1_002104 |

|           |                                |                              |                                                        |                              |                            |
|-----------|--------------------------------|------------------------------|--------------------------------------------------------|------------------------------|----------------------------|
| OG0002419 | CRL1506_001728                 |                              |                                                        | TL2766_002043                | WCFS1_002105, WCFS1_002772 |
| OG0002743 | CRL1506_000700                 | CRL681_000656                |                                                        |                              | WCFS1_002108               |
| OG0003460 |                                |                              |                                                        |                              | WCFS1_002109               |
| OG0002889 | CRL1506_000698                 |                              |                                                        |                              | WCFS1_002115               |
| OG0002888 | CRL1506_000697                 |                              |                                                        |                              | WCFS1_002116               |
| OG0002622 |                                | CRL681_000220                | MPL16_002888                                           | TL2766_000049                | WCFS1_002117               |
| OG0001258 | CRL1506_002060                 | CRL681_000222                | MPL16_002890                                           | TL2766_000047                | WCFS1_002119               |
| OG0003461 |                                |                              |                                                        |                              | WCFS1_002121               |
| OG0003462 |                                |                              |                                                        |                              | WCFS1_002122               |
| OG0003056 |                                |                              |                                                        | TL2766_001069                | WCFS1_002123               |
| OG0002804 |                                |                              | MPL16_001557                                           | TL2766_001072                | WCFS1_002125               |
| OG0003463 |                                |                              |                                                        |                              | WCFS1_002126               |
| OG0002627 |                                | CRL681_000685                | MPL16_001559                                           | TL2766_001074                | WCFS1_002127               |
| OG0003464 |                                |                              |                                                        |                              | WCFS1_002128               |
| OG0002626 |                                | CRL681_000681                | MPL16_001561                                           | TL2766_001078                | WCFS1_002129               |
| OG0002803 |                                |                              | MPL16_001553                                           | TL2766_001068                | WCFS1_002130               |
| OG0003465 |                                |                              |                                                        |                              | WCFS1_002131               |
| OG0003058 |                                |                              |                                                        |                              | WCFS1_002132, WCFS1_002843 |
| OG0002715 | CRL1506_002626                 |                              | MPL16_002663                                           |                              | WCFS1_002133               |
| OG0003059 |                                |                              |                                                        |                              | WCFS1_002134, WCFS1_002845 |
| OG0003466 |                                |                              |                                                        |                              | WCFS1_002135               |
| OG0003467 |                                |                              |                                                        |                              | WCFS1_002136               |
| OG0001257 | CRL1506_002058                 | CRL681_000224                | MPL16_002892                                           | TL2766_000045                | WCFS1_002139               |
| OG0001256 | CRL1506_002057                 | CRL681_000225                | MPL16_002893                                           | TL2766_000044                | WCFS1_002140               |
| OG0001255 | CRL1506_002056                 | CRL681_000226                | MPL16_002894                                           | TL2766_000043                | WCFS1_002141               |
| OG0001254 | CRL1506_002055                 | CRL681_000227                | MPL16_002895                                           | TL2766_000042                | WCFS1_002142               |
| OG0002623 |                                | CRL681_000228                | MPL16_002896                                           | TL2766_000041                | WCFS1_002143               |
| OG0000012 | CRL1506_002052, CRL1506_002053 | CRL681_000229, CRL681_000230 | MPL16_002897, MPL16_002898, MPL16_002899, MPL16_002900 | TL2766_000039, TL2766_000040 | WCFS1_002144, WCFS1_002145 |

|           |                                |                              |                            |                              |                            |
|-----------|--------------------------------|------------------------------|----------------------------|------------------------------|----------------------------|
| OG0001253 | CRL1506_002051                 | CRL681_000231                | MPL16_002901               | TL2766_000038                | WCFS1_002146               |
| OG0002624 |                                | CRL681_000232                | MPL16_002902               | TL2766_000037                | WCFS1_002147               |
| OG0001118 | CRL1506_001864                 | CRL681_000233                | MPL16_002903               | TL2766_000036                | WCFS1_002148               |
| OG0002295 | CRL1506_000695                 | CRL681_000235                | MPL16_002905               | TL2766_000034                | WCFS1_002150               |
| OG0002294 | CRL1506_000694                 | CRL681_000236                | MPL16_002906               | TL2766_000033                | WCFS1_002151               |
| OG0002293 | CRL1506_000693                 | CRL681_000237                | MPL16_002907               | TL2766_000032                | WCFS1_002152               |
| OG0002292 | CRL1506_000692                 | CRL681_000238                | MPL16_002908               | TL2766_000031                | WCFS1_002153               |
| OG0002291 | CRL1506_000691                 | CRL681_000239                | MPL16_002909               | TL2766_000030                | WCFS1_002154               |
| OG0002290 | CRL1506_000690                 | CRL681_000240                | MPL16_002910               | TL2766_000029                | WCFS1_002155               |
| OG0002289 | CRL1506_000689                 | CRL681_000241                | MPL16_002911               | TL2766_000028                | WCFS1_002156               |
| OG0002288 | CRL1506_000688                 | CRL681_000242                | MPL16_002912               | TL2766_000027                | WCFS1_002157               |
| OG0002287 | CRL1506_000686                 | CRL681_000244                | MPL16_000063               | TL2766_000025                | WCFS1_002159               |
| OG0002286 | CRL1506_000685                 | CRL681_000245                | MPL16_000064               | TL2766_000024                | WCFS1_002160               |
| OG0002285 | CRL1506_000684                 | CRL681_000246                | MPL16_000065               | TL2766_000023                | WCFS1_002161               |
| OG0002284 | CRL1506_000683                 | CRL681_000247                | MPL16_000066               | TL2766_000022                | WCFS1_002162               |
| OG0002283 | CRL1506_000682                 | CRL681_000248                | MPL16_000067               | TL2766_000021                | WCFS1_002163               |
| OG0002282 | CRL1506_000681                 | CRL681_000249                | MPL16_000068               | TL2766_000020                | WCFS1_002164               |
| OG0002281 | CRL1506_000680                 | CRL681_000250                | MPL16_000069               | TL2766_000019                | WCFS1_002165               |
| OG0002280 | CRL1506_000679                 | CRL681_000251                | MPL16_000070               | TL2766_000018                | WCFS1_002166               |
| OG0002279 | CRL1506_000678                 | CRL681_000252                | MPL16_000071               | TL2766_000017                | WCFS1_002167               |
| OG0002278 | CRL1506_000677                 | CRL681_000253                | MPL16_000072               | TL2766_000016                | WCFS1_002168               |
| OG0002277 | CRL1506_000676                 | CRL681_000254                | MPL16_000073               | TL2766_000015                | WCFS1_002169               |
| OG0002276 | CRL1506_000675                 | CRL681_000255                | MPL16_000074               | TL2766_000014                | WCFS1_002170               |
| OG0002275 | CRL1506_000674                 | CRL681_000256                | MPL16_000075               | TL2766_000013                | WCFS1_002171               |
| OG0002299 | CRL1506_000673                 | CRL681_000257                | MPL16_000076               | TL2766_000012                | WCFS1_002172               |
| OG0002053 | CRL1506_000329                 | CRL681_000258                | MPL16_000077               | TL2766_000011                | WCFS1_002173               |
| OG0000042 | CRL1506_000328, CRL1506_000464 | CRL681_000259, CRL681_002384 | MPL16_000078, MPL16_001834 | TL2766_000010, TL2766_002251 | WCFS1_002174, WCFS1_002516 |
| OG0002052 | CRL1506_000327                 | CRL681_000260                | MPL16_000079               | TL2766_000009                | WCFS1_002175               |
| OG0002051 | CRL1506_000326                 | CRL681_000261                | MPL16_000080               | TL2766_000008                | WCFS1_002176               |
| OG0002050 | CRL1506_000325                 | CRL681_000262                | MPL16_000081               | TL2766_000007                | WCFS1_002177               |
| OG0002049 | CRL1506_000324                 | CRL681_000263                | MPL16_000082               | TL2766_000006                | WCFS1_002178               |
| OG0002048 | CRL1506_000323                 | CRL681_000264                | MPL16_000083               | TL2766_000005                | WCFS1_002179               |
| OG0002055 | CRL1506_000322                 | CRL681_000265                | MPL16_000084               | TL2766_000004                | WCFS1_002180               |

|           |                |               |              |               |                            |
|-----------|----------------|---------------|--------------|---------------|----------------------------|
| OG0002047 | CRL1506_000321 | CRL681_000266 | MPL16_000085 | TL2766_000003 | WCFS1_002181               |
| OG0002046 | CRL1506_000320 | CRL681_000267 | MPL16_000086 | TL2766_000002 | WCFS1_002182               |
| OG0002045 | CRL1506_000319 | CRL681_000268 | MPL16_000087 | TL2766_000001 | WCFS1_002183               |
| OG0002044 | CRL1506_000318 | CRL681_000269 | MPL16_000088 | TL2766_002019 | WCFS1_002184               |
| OG0002043 | CRL1506_000317 | CRL681_000270 | MPL16_000089 | TL2766_002018 | WCFS1_002185               |
| OG0002042 | CRL1506_000316 | CRL681_000271 | MPL16_000090 | TL2766_002017 | WCFS1_002186               |
| OG0002041 | CRL1506_000315 | CRL681_000272 | MPL16_000092 | TL2766_002016 | WCFS1_002187               |
| OG0002040 | CRL1506_000314 | CRL681_000273 | MPL16_000093 | TL2766_002015 | WCFS1_002188               |
| OG0002570 | CRL1506_000313 | CRL681_000274 |              | TL2766_002014 | WCFS1_002189               |
| OG0002039 | CRL1506_000312 | CRL681_000275 | MPL16_000095 | TL2766_002013 | WCFS1_002190               |
| OG0002054 | CRL1506_000311 | CRL681_000276 | MPL16_000096 | TL2766_002012 | WCFS1_002191               |
| OG0002038 | CRL1506_000310 | CRL681_000277 | MPL16_000097 | TL2766_002011 | WCFS1_002192               |
| OG0002037 | CRL1506_000309 | CRL681_000278 | MPL16_000098 | TL2766_002010 | WCFS1_002193               |
| OG0002036 | CRL1506_000308 | CRL681_000279 | MPL16_000099 | TL2766_002009 | WCFS1_002194               |
| OG0002035 | CRL1506_000307 | CRL681_000280 | MPL16_000100 | TL2766_002008 | WCFS1_002195               |
| OG0002034 | CRL1506_000306 | CRL681_000281 | MPL16_000101 | TL2766_002007 | WCFS1_002196               |
| OG0002033 | CRL1506_000305 | CRL681_000282 | MPL16_000102 | TL2766_002006 | WCFS1_002197               |
| OG0002032 | CRL1506_000304 | CRL681_000283 | MPL16_000296 | TL2766_002005 | WCFS1_002198               |
| OG0002031 | CRL1506_000303 | CRL681_000284 | MPL16_000297 | TL2766_002004 | WCFS1_002199               |
| OG0002030 | CRL1506_000302 | CRL681_000285 | MPL16_000298 | TL2766_002003 | WCFS1_002200               |
| OG0000169 | CRL1506_002027 | CRL681_002419 | MPL16_001868 | TL2766_002645 | WCFS1_002201, WCFS1_002551 |
| OG0003468 |                |               |              |               | WCFS1_002203               |
| OG0002029 | CRL1506_000299 | CRL681_000288 | MPL16_000300 | TL2766_001999 | WCFS1_002205               |
| OG0002028 | CRL1506_000298 | CRL681_000289 | MPL16_000301 | TL2766_001998 | WCFS1_002206               |
| OG0002027 | CRL1506_000297 | CRL681_000290 | MPL16_000302 | TL2766_001997 | WCFS1_002207               |
| OG0002026 | CRL1506_000296 | CRL681_000291 | MPL16_000303 | TL2766_001996 | WCFS1_002208               |
| OG0002025 | CRL1506_000295 | CRL681_000292 | MPL16_001492 | TL2766_001995 | WCFS1_002209               |
| OG0002024 | CRL1506_000294 | CRL681_000293 | MPL16_000304 | TL2766_001994 | WCFS1_002210               |
| OG0002023 | CRL1506_000293 | CRL681_000294 | MPL16_000305 | TL2766_001993 | WCFS1_002211               |
| OG0002022 | CRL1506_000292 | CRL681_000295 | MPL16_000306 | TL2766_001992 | WCFS1_002212               |
| OG0002021 | CRL1506_000291 | CRL681_000296 | MPL16_000307 | TL2766_001991 | WCFS1_002213               |
| OG0002569 | CRL1506_000290 | CRL681_000297 |              | TL2766_001990 | WCFS1_002214               |
| OG0002568 | CRL1506_000289 | CRL681_000298 |              | TL2766_001989 | WCFS1_002215               |

|           |                |                              |                                                        |               |                            |
|-----------|----------------|------------------------------|--------------------------------------------------------|---------------|----------------------------|
| OG0002020 | CRL1506_000288 | CRL681_000299                | MPL16_000310                                           | TL2766_001988 | WCFS1_002216               |
| OG0002019 | CRL1506_000287 | CRL681_000300                | MPL16_000311                                           | TL2766_001987 | WCFS1_002217               |
| OG0002018 | CRL1506_000286 | CRL681_000301                | MPL16_000312                                           | TL2766_001986 | WCFS1_002218               |
| OG0002017 | CRL1506_000285 | CRL681_000302                | MPL16_000313                                           | TL2766_001985 | WCFS1_002219               |
| OG0002016 | CRL1506_000284 | CRL681_000303                | MPL16_000314                                           | TL2766_001984 | WCFS1_002220               |
| OG0002780 |                | CRL681_000304                | MPL16_000315                                           |               | WCFS1_002221               |
| OG0002015 | CRL1506_000282 | CRL681_000305                | MPL16_000316                                           | TL2766_001982 | WCFS1_002222               |
| OG0002014 | CRL1506_000281 | CRL681_000306                | MPL16_000317                                           | TL2766_001981 | WCFS1_002223               |
| OG0002562 | CRL1506_000115 | CRL681_000307                |                                                        | TL2766_001980 | WCFS1_002224               |
| OG0001880 | CRL1506_000116 | CRL681_000308                | MPL16_002538                                           | TL2766_001979 | WCFS1_002225               |
| OG0000100 | CRL1506_000117 | CRL681_000309, CRL681_002938 | MPL16_002539                                           | TL2766_001978 | WCFS1_002226, WCFS1_003049 |
| OG0001881 | CRL1506_000118 | CRL681_000310                | MPL16_002540                                           | TL2766_001977 | WCFS1_002227               |
| OG0000066 | CRL1506_000119 | CRL681_000311                | MPL16_001185, MPL16_001831, MPL16_002073, MPL16_002541 | TL2766_001976 | WCFS1_002228               |
| OG0002563 | CRL1506_000120 | CRL681_000312                |                                                        | TL2766_001975 | WCFS1_002229               |
| OG0000101 | CRL1506_000121 | CRL681_000313, CRL681_000560 | MPL16_000461, MPL16_001731                             | TL2766_001974 | WCFS1_002230               |
| OG0001882 | CRL1506_000122 | CRL681_000314                | MPL16_001732                                           | TL2766_001973 | WCFS1_002231               |
| OG0001883 | CRL1506_000123 | CRL681_000315                | MPL16_001733                                           | TL2766_001972 | WCFS1_002232               |
| OG0001884 | CRL1506_000124 | CRL681_000316                | MPL16_001734                                           | TL2766_001971 | WCFS1_002233               |
| OG0001885 | CRL1506_000125 | CRL681_000317                | MPL16_001735                                           | TL2766_001970 | WCFS1_002234               |
| OG0001886 | CRL1506_000126 | CRL681_000318                | MPL16_001736                                           | TL2766_001969 | WCFS1_002235               |
| OG0001887 | CRL1506_000127 | CRL681_000319                | MPL16_001737                                           | TL2766_001968 | WCFS1_002236               |
| OG0001888 | CRL1506_000128 | CRL681_000320                | MPL16_001738                                           | TL2766_001967 | WCFS1_002237               |
| OG0001889 | CRL1506_000129 | CRL681_000321                | MPL16_001739                                           | TL2766_001966 | WCFS1_002238               |
| OG0001890 | CRL1506_000130 | CRL681_000322                | MPL16_001740                                           | TL2766_001965 | WCFS1_002240               |
| OG0001891 | CRL1506_000131 | CRL681_000323                | MPL16_001741                                           | TL2766_001964 | WCFS1_002241               |
| OG0001892 | CRL1506_000132 | CRL681_000324                | MPL16_001742                                           | TL2766_001963 | WCFS1_002242               |
| OG0001893 | CRL1506_000133 | CRL681_000325                | MPL16_001743                                           | TL2766_001962 | WCFS1_002243               |
| OG0002564 | CRL1506_000134 | CRL681_000326                |                                                        | TL2766_001961 | WCFS1_002244               |

|           |                                |                              |                            |                              |                            |
|-----------|--------------------------------|------------------------------|----------------------------|------------------------------|----------------------------|
| OG0001894 | CRL1506_000135                 | CRL681_000327                |                            | TL2766_001960, TL2766_002304 | WCFS1_002245               |
| OG0001895 | CRL1506_000136                 | CRL681_000328                | MPL16_001745               | TL2766_002305                | WCFS1_002246               |
| OG0001896 | CRL1506_000137                 | CRL681_000329                | MPL16_001746               | TL2766_002306                | WCFS1_002247               |
| OG0001897 | CRL1506_000138                 | CRL681_000330                | MPL16_001747               | TL2766_002307                | WCFS1_002248               |
| OG0001898 | CRL1506_000139                 | CRL681_000331                | MPL16_001748               | TL2766_002308                | WCFS1_002249               |
| OG0001899 | CRL1506_000140                 | CRL681_000332                | MPL16_001749               | TL2766_002309                | WCFS1_002250               |
| OG0001900 | CRL1506_000141                 | CRL681_000333                | MPL16_001750               | TL2766_002310                | WCFS1_002251               |
| OG0001901 | CRL1506_000142                 | CRL681_000334                | MPL16_001751               | TL2766_002311                | WCFS1_002252               |
| OG0001902 | CRL1506_000143                 | CRL681_000335                | MPL16_001752               | TL2766_002312                | WCFS1_002253               |
| OG0001903 | CRL1506_000144                 | CRL681_000336                | MPL16_001753               | TL2766_002313                | WCFS1_002254               |
| OG0001904 | CRL1506_000145                 | CRL681_000337                | MPL16_001754               | TL2766_002314                | WCFS1_002255               |
| OG0001905 | CRL1506_000146                 | CRL681_000338                | MPL16_001755               | TL2766_002315                | WCFS1_002256               |
| OG0001906 | CRL1506_000147                 | CRL681_000339                | MPL16_001756               | TL2766_002316                | WCFS1_002257               |
| OG0002876 | CRL1506_000148                 |                              |                            |                              | WCFS1_002258               |
| OG0002879 | CRL1506_000149                 |                              |                            |                              | WCFS1_002259               |
| OG0002877 | CRL1506_000150                 |                              |                            |                              | WCFS1_002260               |
| OG0002878 | CRL1506_000151                 |                              |                            |                              | WCFS1_002261               |
| OG0002880 | CRL1506_000152                 |                              |                            |                              | WCFS1_002262               |
| OG0001907 | CRL1506_000153                 | CRL681_000340                | MPL16_000960               | TL2766_002317                | WCFS1_002263               |
| OG0001908 | CRL1506_000154                 | CRL681_000341                | MPL16_000961               | TL2766_002318                | WCFS1_002264               |
| OG0002565 | CRL1506_000155                 | CRL681_000345                |                            | TL2766_002322                | WCFS1_002265               |
| OG0001909 | CRL1506_000156                 | CRL681_000346                | MPL16_000962               | TL2766_002323                | WCFS1_002266               |
| OG0002012 | CRL1506_000157                 | CRL681_000347                | MPL16_000963               | TL2766_002324                | WCFS1_002267               |
| OG0000039 | CRL1506_000158, CRL1506_002520 | CRL681_000348, CRL681_002986 | MPL16_000964, MPL16_003187 | TL2766_001821, TL2766_002325 | WCFS1_002268, WCFS1_002991 |
| OG0001910 | CRL1506_000159                 | CRL681_000349                | MPL16_000965               | TL2766_002326                | WCFS1_002269               |
| OG0001911 | CRL1506_000160                 | CRL681_000350                | MPL16_000966               | TL2766_002327                | WCFS1_002270               |
| OG0001912 | CRL1506_000161                 | CRL681_000351                | MPL16_000967               | TL2766_002328                | WCFS1_002271               |
| OG0001913 | CRL1506_000162                 | CRL681_000352                | MPL16_000968               | TL2766_002329                | WCFS1_002272               |
| OG0000225 | CRL1506_000163                 | CRL681_000353                | MPL16_000969               | TL2766_002330, TL2766_002451 | WCFS1_002273               |
| OG0001914 | CRL1506_000164                 | CRL681_000354                | MPL16_000970               | TL2766_002331                | WCFS1_002274               |
| OG0001915 | CRL1506_000165                 | CRL681_000355                | MPL16_000971               | TL2766_002332                | WCFS1_002275               |

|           |                |                              |                            |                              |              |
|-----------|----------------|------------------------------|----------------------------|------------------------------|--------------|
| OG0002566 | CRL1506_000166 | CRL681_000356                | MPL16_000972               |                              | WCFS1_002276 |
| OG0001916 | CRL1506_000167 | CRL681_000357                | MPL16_000973               | TL2766_002334                | WCFS1_002277 |
| OG0001917 | CRL1506_000168 | CRL681_000358                | MPL16_000974               | TL2766_002335                | WCFS1_002278 |
| OG0001918 | CRL1506_000169 | CRL681_000359                | MPL16_000975               | TL2766_002336                | WCFS1_002279 |
| OG0000226 | CRL1506_000170 | CRL681_000360, CRL681_002255 | MPL16_000976               | TL2766_002337                | WCFS1_002280 |
| OG0001919 | CRL1506_000171 | CRL681_000361                | MPL16_000977               | TL2766_002338                | WCFS1_002281 |
| OG0001920 | CRL1506_000172 | CRL681_000362                | MPL16_000978               | TL2766_002339                | WCFS1_002282 |
| OG0001921 | CRL1506_000173 | CRL681_000363                | MPL16_000979               | TL2766_002340                | WCFS1_002283 |
| OG0000227 | CRL1506_000174 | CRL681_000364                | MPL16_000980               | TL2766_002154, TL2766_002341 | WCFS1_002284 |
| OG0001922 | CRL1506_000175 | CRL681_000365                | MPL16_000981               | TL2766_002342                | WCFS1_002285 |
| OG0001923 | CRL1506_000176 | CRL681_000366                | MPL16_000982               | TL2766_002343                | WCFS1_002286 |
| OG0001924 | CRL1506_000177 | CRL681_000367                | MPL16_000983               | TL2766_002344                | WCFS1_002287 |
| OG0001925 | CRL1506_000178 | CRL681_000368                | MPL16_000984               | TL2766_002345                | WCFS1_002288 |
| OG0000228 | CRL1506_000180 | CRL681_000370, CRL681_002833 | MPL16_000986               | TL2766_002347                | WCFS1_002290 |
| OG0001926 | CRL1506_000181 | CRL681_000371                | MPL16_000987               | TL2766_002348                | WCFS1_002291 |
| OG0000229 | CRL1506_000182 | CRL681_000372                | MPL16_000988, MPL16_001097 | TL2766_002349                | WCFS1_002292 |
| OG0001927 | CRL1506_000183 | CRL681_000373                | MPL16_000989               | TL2766_002350                | WCFS1_002293 |
| OG0001928 | CRL1506_000184 | CRL681_000374                | MPL16_000990               | TL2766_002351                | WCFS1_002294 |
| OG0001929 | CRL1506_000185 | CRL681_000375                | MPL16_000991               | TL2766_002352                | WCFS1_002295 |
| OG0001930 | CRL1506_000186 | CRL681_000376                | MPL16_000992               | TL2766_002353                | WCFS1_002296 |
| OG0001931 | CRL1506_000187 | CRL681_000377                | MPL16_000993               | TL2766_002354                | WCFS1_002297 |
| OG0001932 | CRL1506_000188 | CRL681_000378                | MPL16_000994               | TL2766_002355                | WCFS1_002298 |
| OG0001933 | CRL1506_000189 | CRL681_000379                | MPL16_001348               | TL2766_002356                | WCFS1_002299 |
| OG0001934 | CRL1506_000190 | CRL681_000380                | MPL16_001347               | TL2766_002357                | WCFS1_002300 |
| OG0001935 | CRL1506_000191 | CRL681_000381                | MPL16_001346               | TL2766_002358                | WCFS1_002301 |
| OG0001936 | CRL1506_000192 | CRL681_000382                | MPL16_001345               | TL2766_002359                | WCFS1_002302 |
| OG0001937 | CRL1506_000193 | CRL681_000383                | MPL16_001344               | TL2766_002360                | WCFS1_002303 |
| OG0001938 | CRL1506_000195 | CRL681_000385                | MPL16_001342               | TL2766_002362                | WCFS1_002305 |
| OG0001939 | CRL1506_000196 | CRL681_000386                | MPL16_001341               | TL2766_002363                | WCFS1_002306 |
| OG0001940 | CRL1506_000197 | CRL681_000387                | MPL16_001340               | TL2766_002364                | WCFS1_002307 |

|           |                |                              |              |               |              |
|-----------|----------------|------------------------------|--------------|---------------|--------------|
| OG0001941 | CRL1506_000198 | CRL681_000388                | MPL16_001339 | TL2766_002365 | WCFS1_002308 |
| OG0001942 | CRL1506_000199 | CRL681_000389                | MPL16_001338 | TL2766_002366 | WCFS1_002309 |
| OG0001943 | CRL1506_000200 | CRL681_000390                | MPL16_001337 | TL2766_002367 | WCFS1_002310 |
| OG0001944 | CRL1506_000201 | CRL681_000391                | MPL16_001336 | TL2766_002368 | WCFS1_002311 |
| OG0001945 | CRL1506_000202 | CRL681_000392                | MPL16_001335 | TL2766_002369 | WCFS1_002312 |
| OG0001946 | CRL1506_000203 | CRL681_000393                | MPL16_001334 | TL2766_002370 | WCFS1_002313 |
| OG0001947 | CRL1506_000204 | CRL681_000394                | MPL16_001333 | TL2766_002371 | WCFS1_002314 |
| OG0001948 | CRL1506_000205 | CRL681_000395                | MPL16_001332 | TL2766_002372 | WCFS1_002315 |
| OG0001949 | CRL1506_000206 | CRL681_000396                | MPL16_001331 | TL2766_002373 | WCFS1_002316 |
| OG0001950 | CRL1506_000207 | CRL681_000397                | MPL16_001330 | TL2766_002374 | WCFS1_002317 |
| OG0001951 | CRL1506_000208 | CRL681_000398                | MPL16_001329 | TL2766_002375 | WCFS1_002318 |
| OG0001952 | CRL1506_000209 | CRL681_000399                | MPL16_001328 | TL2766_002376 | WCFS1_002319 |
| OG0001953 | CRL1506_000210 | CRL681_000400                | MPL16_001327 | TL2766_002377 | WCFS1_002320 |
| OG0001954 | CRL1506_000211 | CRL681_000401                | MPL16_001326 | TL2766_002378 | WCFS1_002321 |
| OG0001955 | CRL1506_000212 | CRL681_000402                | MPL16_001325 | TL2766_002379 | WCFS1_002322 |
| OG0001956 | CRL1506_000213 | CRL681_000403                | MPL16_001324 | TL2766_002380 | WCFS1_002323 |
| OG0001957 | CRL1506_000214 | CRL681_000404                | MPL16_001323 | TL2766_002381 | WCFS1_002324 |
| OG0001958 | CRL1506_000215 | CRL681_000405                | MPL16_001322 | TL2766_002382 | WCFS1_002325 |
| OG0001959 | CRL1506_000216 | CRL681_000406                | MPL16_001321 | TL2766_002383 | WCFS1_002326 |
| OG0001960 | CRL1506_000217 | CRL681_000407                | MPL16_001320 | TL2766_002384 | WCFS1_002327 |
| OG0001961 | CRL1506_000218 | CRL681_000408                | MPL16_001319 | TL2766_002385 | WCFS1_002328 |
| OG0001962 | CRL1506_000219 | CRL681_000409                | MPL16_001318 | TL2766_002386 | WCFS1_002329 |
| OG0001963 | CRL1506_000220 | CRL681_000410                | MPL16_001317 | TL2766_002387 | WCFS1_002330 |
| OG0001964 | CRL1506_000221 | CRL681_000411                | MPL16_001316 | TL2766_002388 | WCFS1_002331 |
| OG0001965 | CRL1506_000222 | CRL681_000412                | MPL16_001315 | TL2766_002389 | WCFS1_002332 |
| OG0001966 | CRL1506_000223 | CRL681_000413                | MPL16_001314 | TL2766_002390 | WCFS1_002333 |
| OG0001967 | CRL1506_000224 | CRL681_000414                | MPL16_001313 | TL2766_002391 | WCFS1_002334 |
| OG0001968 | CRL1506_000225 | CRL681_000415                | MPL16_001312 | TL2766_002392 | WCFS1_002335 |
| OG0001969 | CRL1506_000226 | CRL681_000416                | MPL16_001311 | TL2766_002393 | WCFS1_002336 |
| OG0001970 | CRL1506_000227 | CRL681_000417                | MPL16_001310 | TL2766_002869 | WCFS1_002337 |
| OG0001971 | CRL1506_000228 | CRL681_000418                | MPL16_001309 | TL2766_002868 | WCFS1_002338 |
| OG0000230 | CRL1506_000229 | CRL681_000419, CRL681_000561 | MPL16_001308 | TL2766_002867 | WCFS1_002339 |
| OG0001972 | CRL1506_000230 | CRL681_000420                | MPL16_001307 | TL2766_002866 | WCFS1_002340 |



|           |                |                              |                            |                              |              |
|-----------|----------------|------------------------------|----------------------------|------------------------------|--------------|
| OG0001973 | CRL1506_000231 | CRL681_000421                | MPL16_001306               | TL2766_002865                | WCFS1_002341 |
| OG0001974 | CRL1506_000232 | CRL681_000422                | MPL16_001304               | TL2766_002864                | WCFS1_002342 |
| OG0001975 | CRL1506_000233 | CRL681_000423                | MPL16_001303               | TL2766_002863                | WCFS1_002343 |
| OG0001976 | CRL1506_000234 | CRL681_000424                | MPL16_001302               | TL2766_002862                | WCFS1_002344 |
| OG0001977 | CRL1506_000235 | CRL681_000425                | MPL16_001301               | TL2766_002861                | WCFS1_002345 |
| OG0001978 | CRL1506_000236 | CRL681_000426                | MPL16_001299               | TL2766_002860                | WCFS1_002346 |
| OG0001979 | CRL1506_000237 | CRL681_000427                | MPL16_001298               | TL2766_002859                | WCFS1_002347 |
| OG0002013 | CRL1506_000238 | CRL681_000428                | MPL16_001297               | TL2766_002858                | WCFS1_002348 |
| OG0001980 | CRL1506_000239 | CRL681_000429                | MPL16_001296               | TL2766_002857                | WCFS1_002349 |
| OG0001981 | CRL1506_000240 | CRL681_000430                | MPL16_001295               | TL2766_002856                | WCFS1_002350 |
| OG0001982 | CRL1506_000241 | CRL681_000431                | MPL16_001294               | TL2766_002855                | WCFS1_002351 |
| OG0001983 | CRL1506_000242 | CRL681_000432                | MPL16_001293               | TL2766_002854                | WCFS1_002352 |
| OG0001984 | CRL1506_000243 | CRL681_000433                | MPL16_001292               | TL2766_002853                | WCFS1_002353 |
| OG0001985 | CRL1506_000244 | CRL681_000434                | MPL16_001291               | TL2766_002852                | WCFS1_002354 |
| OG0001986 | CRL1506_000245 | CRL681_000435                | MPL16_001290               | TL2766_002851                | WCFS1_002355 |
| OG0001987 | CRL1506_000246 | CRL681_000436                | MPL16_001289               | TL2766_002850                | WCFS1_002356 |
| OG0001988 | CRL1506_000247 | CRL681_000437                | MPL16_001288               | TL2766_002849                | WCFS1_002357 |
| OG0001989 | CRL1506_000248 | CRL681_000438                | MPL16_001286               | TL2766_002848                | WCFS1_002358 |
| OG0001990 | CRL1506_000249 | CRL681_000439                | MPL16_001285               | TL2766_002847                | WCFS1_002359 |
| OG0000231 | CRL1506_000250 | CRL681_000440                | MPL16_000773, MPL16_001284 | TL2766_002846                | WCFS1_002360 |
| OG0001991 | CRL1506_000251 | CRL681_000441                | MPL16_001283               | TL2766_002845                | WCFS1_002361 |
| OG0001992 | CRL1506_000252 | CRL681_000442                | MPL16_001282               | TL2766_002844                | WCFS1_002362 |
| OG0001993 | CRL1506_000253 | CRL681_000443                | MPL16_001278               | TL2766_002843                | WCFS1_002363 |
| OG0001994 | CRL1506_000256 | CRL681_000446                | MPL16_001275               | TL2766_002840                | WCFS1_002366 |
| OG0001995 | CRL1506_000257 | CRL681_000447                | MPL16_001274               | TL2766_002839                | WCFS1_002367 |
| OG0001996 | CRL1506_000258 | CRL681_000448                | MPL16_001273               | TL2766_002838                | WCFS1_002368 |
| OG0001997 | CRL1506_000259 | CRL681_000449                | MPL16_001272               | TL2766_002837                | WCFS1_002369 |
| OG0001998 | CRL1506_000260 | CRL681_000450                | MPL16_001271               | TL2766_002836                | WCFS1_002370 |
| OG0001999 | CRL1506_000261 | CRL681_000451                | MPL16_001270               | TL2766_002835                | WCFS1_002371 |
| OG0002000 | CRL1506_000262 | CRL681_000452                | MPL16_001269               | TL2766_002834                | WCFS1_002372 |
| OG0000102 | CRL1506_000263 | CRL681_000453, CRL681_002578 | MPL16_001268               | TL2766_001597, TL2766_002833 | WCFS1_002373 |
| OG0002001 | CRL1506_000264 | CRL681_000454                | MPL16_001267               | TL2766_002832                | WCFS1_002374 |

|           |                                                                                      |                              |                            |                                                                                 |              |
|-----------|--------------------------------------------------------------------------------------|------------------------------|----------------------------|---------------------------------------------------------------------------------|--------------|
| OG0002002 | CRL1506_000265                                                                       | CRL681_000455                | MPL16_001266               | TL2766_002831                                                                   | WCFS1_002375 |
| OG0002003 | CRL1506_000266                                                                       | CRL681_002210                | MPL16_001265               | TL2766_002830                                                                   | WCFS1_002376 |
| OG0002004 | CRL1506_000267                                                                       | CRL681_002211                | MPL16_001264               | TL2766_002829                                                                   | WCFS1_002377 |
| OG0002005 | CRL1506_000268                                                                       | CRL681_002212                | MPL16_001263               | TL2766_002828                                                                   | WCFS1_002378 |
| OG0002663 |                                                                                      | CRL681_002213                | MPL16_001262               | TL2766_002827                                                                   | WCFS1_002379 |
| OG0000175 | CRL1506_000270, CRL1506_002220                                                       | CRL681_002214                | MPL16_001261               | TL2766_002826                                                                   | WCFS1_002380 |
| OG0002006 | CRL1506_000271                                                                       | CRL681_002215                | MPL16_001260               | TL2766_002825                                                                   | WCFS1_002381 |
| OG0002007 | CRL1506_000272                                                                       | CRL681_002216                | MPL16_001259               | TL2766_002824                                                                   | WCFS1_002382 |
| OG0002008 | CRL1506_000273                                                                       | CRL681_002217                | MPL16_001258               | TL2766_002823                                                                   | WCFS1_002383 |
| OG0002009 | CRL1506_000274                                                                       | CRL681_002218                | MPL16_001257               | TL2766_002822                                                                   | WCFS1_002384 |
| OG0002010 | CRL1506_000275                                                                       | CRL681_002219                | MPL16_001256               | TL2766_002821                                                                   | WCFS1_002385 |
| OG0000008 | CRL1506_000276, CRL1506_000387,<br>CRL1506_000393, CRL1506_000400,<br>CRL1506_001835 | CRL681_001914, CRL681_002220 | MPL16_001092, MPL16_001255 | TL2766_002148, TL2766_002551,<br>TL2766_002557, TL2766_002564,<br>TL2766_002820 | WCFS1_002386 |
| OG0002011 | CRL1506_000277                                                                       | CRL681_002221                | MPL16_001254               | TL2766_002819                                                                   | WCFS1_002387 |
| OG0002056 | CRL1506_000333                                                                       | CRL681_002264                | MPL16_002005               | TL2766_000528                                                                   | WCFS1_002392 |
| OG0002057 | CRL1506_000334                                                                       | CRL681_002265                | MPL16_002006               | TL2766_000529                                                                   | WCFS1_002393 |
| OG0002058 | CRL1506_000335                                                                       | CRL681_002266                | MPL16_002007               | TL2766_000530                                                                   | WCFS1_002394 |
| OG0002571 | CRL1506_000336                                                                       | CRL681_002267                |                            | TL2766_000531                                                                   | WCFS1_002395 |
| OG0002059 | CRL1506_000337                                                                       | CRL681_002268                | MPL16_002009               | TL2766_000532                                                                   | WCFS1_002396 |
| OG0002060 | CRL1506_000338                                                                       | CRL681_002269                | MPL16_002011               | TL2766_000533                                                                   | WCFS1_002397 |
| OG0002061 | CRL1506_000340                                                                       | CRL681_002271                | MPL16_002012               | TL2766_002275                                                                   | WCFS1_002399 |
| OG0002062 | CRL1506_000341                                                                       | CRL681_002272                | MPL16_002013               | TL2766_002276                                                                   | WCFS1_002400 |
| OG0002156 | CRL1506_000342                                                                       | CRL681_002273                | MPL16_002014               | TL2766_002277                                                                   | WCFS1_002401 |
| OG0002063 | CRL1506_000343                                                                       | CRL681_002274                | MPL16_002015               | TL2766_002278                                                                   | WCFS1_002402 |
| OG0002064 | CRL1506_000344                                                                       | CRL681_002275                | MPL16_002016               | TL2766_002279                                                                   | WCFS1_002403 |
| OG0002065 | CRL1506_000345                                                                       | CRL681_002276                | MPL16_002017               | TL2766_002280                                                                   | WCFS1_002404 |
| OG0002066 | CRL1506_000346                                                                       | CRL681_002277                | MPL16_002019               | TL2766_002281                                                                   | WCFS1_002405 |
| OG0002067 | CRL1506_000347                                                                       | CRL681_002278                | MPL16_002020               | TL2766_002282                                                                   | WCFS1_002406 |
| OG0000233 | CRL1506_000348                                                                       | CRL681_002279                | MPL16_002021               | TL2766_002283, TL2766_002531                                                    | WCFS1_002407 |

|           |                                |                              |                                                        |                              |                            |
|-----------|--------------------------------|------------------------------|--------------------------------------------------------|------------------------------|----------------------------|
| OG0002068 | CRL1506_000349                 | CRL681_002280                | MPL16_002022                                           | TL2766_002284                | WCFS1_002408               |
| OG0002614 |                                | CRL681_002281                | MPL16_002023                                           | TL2766_002285                | WCFS1_002409               |
| OG0002069 | CRL1506_000351                 | CRL681_002282                | MPL16_002024                                           | TL2766_002286                | WCFS1_002410               |
| OG0002070 | CRL1506_000352                 | CRL681_002283                | MPL16_002025                                           | TL2766_002287                | WCFS1_002411               |
| OG0002071 | CRL1506_000353                 | CRL681_002284                | MPL16_002026                                           | TL2766_002289                | WCFS1_002412               |
| OG0002072 | CRL1506_000354                 | CRL681_002285                | MPL16_002027                                           | TL2766_002290                | WCFS1_002413               |
| OG0002073 | CRL1506_000355                 | CRL681_002286                | MPL16_002028                                           | TL2766_002291                | WCFS1_002414               |
| OG0002074 | CRL1506_000356                 | CRL681_002287                | MPL16_002029                                           | TL2766_002292                | WCFS1_002415               |
| OG0002075 | CRL1506_000357                 | CRL681_002288                | MPL16_002030                                           | TL2766_002293                | WCFS1_002416               |
| OG0002076 | CRL1506_000358                 | CRL681_002289                | MPL16_002031                                           | TL2766_002294                | WCFS1_002417               |
| OG0002077 | CRL1506_000359                 | CRL681_002290                | MPL16_002032                                           | TL2766_002295                | WCFS1_002418               |
| OG0002078 | CRL1506_000360                 | CRL681_002291                | MPL16_002033                                           | TL2766_002296                | WCFS1_002419               |
| OG0002079 | CRL1506_000361                 | CRL681_002292                | MPL16_002034                                           | TL2766_002297                | WCFS1_002420               |
| OG0000043 | CRL1506_000362, CRL1506_000363 | CRL681_002293, CRL681_002294 | MPL16_002035, MPL16_002036                             | TL2766_002298, TL2766_002299 | WCFS1_002421, WCFS1_002422 |
| OG0002080 | CRL1506_000364                 | CRL681_002295                | MPL16_002038                                           | TL2766_002300                | WCFS1_002423               |
| OG0002081 | CRL1506_000365                 | CRL681_002296                | MPL16_002039                                           | TL2766_002525                | WCFS1_002424               |
| OG0002082 | CRL1506_000366                 | CRL681_002297                | MPL16_002040                                           | TL2766_002526                | WCFS1_002425               |
| OG0000011 | CRL1506_000367, CRL1506_002040 | CRL681_002298, CRL681_002432 | MPL16_001099, MPL16_001104, MPL16_001111, MPL16_002041 | TL2766_002527, TL2766_002632 | WCFS1_002426, WCFS1_002564 |
| OG0000234 | CRL1506_000368                 | CRL681_002299                | MPL16_001082, MPL16_002042                             | TL2766_002528                | WCFS1_002427               |
| OG0000016 | CRL1506_000369, CRL1506_002044 | CRL681_002300, CRL681_002436 | MPL16_001081, MPL16_001108, MPL16_002043               | TL2766_002529, TL2766_002628 | WCFS1_002428, WCFS1_002568 |
| OG0002083 | CRL1506_000370                 | CRL681_002301                | MPL16_002044                                           | TL2766_002530                | WCFS1_002429               |
| OG0002572 | CRL1506_000371                 | CRL681_002302                |                                                        | TL2766_002533                | WCFS1_002430               |
| OG0002084 | CRL1506_000372                 | CRL681_002303                | MPL16_002046                                           | TL2766_002534                | WCFS1_002431               |
| OG0002615 |                                | CRL681_002305                | MPL16_002048                                           | TL2766_002536                | WCFS1_002433               |
| OG0002085 | CRL1506_000374                 | CRL681_002306                | MPL16_002049                                           | TL2766_002537                | WCFS1_002434               |
| OG0002086 | CRL1506_000375                 | CRL681_002307                | MPL16_002050                                           | TL2766_002538                | WCFS1_002435               |

|           |                                |                              |                            |                              |                            |
|-----------|--------------------------------|------------------------------|----------------------------|------------------------------|----------------------------|
| OG0000067 | CRL1506_000376                 | CRL681_002308, CRL681_002309 | MPL16_002051               | TL2766_002539, TL2766_002540 | WCFS1_002436, WCFS1_002437 |
| OG0002087 | CRL1506_000377                 | CRL681_002310                | MPL16_002052               | TL2766_002541                | WCFS1_002438               |
| OG0002088 | CRL1506_000378                 | CRL681_002311                | MPL16_002053               | TL2766_002542                | WCFS1_002439               |
| OG0002089 | CRL1506_000379                 | CRL681_002312                | MPL16_002054               | TL2766_002543                | WCFS1_002440               |
| OG0002090 | CRL1506_000380                 | CRL681_002313                | MPL16_002055               | TL2766_002544                | WCFS1_002441               |
| OG0002091 | CRL1506_000381                 | CRL681_002314                | MPL16_002056               | TL2766_002545                | WCFS1_002442               |
| OG0002591 | CRL1506_000382                 | CRL681_002315                |                            | TL2766_002546                | WCFS1_002443               |
| OG0002574 | CRL1506_000383                 | CRL681_002316                |                            | TL2766_002547                | WCFS1_002444               |
| OG0000084 | CRL1506_000384, CRL1506_001834 | CRL681_002317                |                            | TL2766_002147, TL2766_002548 | WCFS1_002445, WCFS1_002669 |
| OG0002575 | CRL1506_000385                 | CRL681_002318                |                            | TL2766_002549                | WCFS1_002446               |
| OG0002576 | CRL1506_000386                 | CRL681_002319                |                            | TL2766_002550                | WCFS1_002447               |
| OG0002896 |                                | CRL681_002320                |                            |                              | WCFS1_002448               |
| OG0000044 | CRL1506_000403, CRL1506_000483 | CRL681_002321, CRL681_002403 | MPL16_001678, MPL16_001852 | TL2766_002270, TL2766_002567 | WCFS1_002449, WCFS1_002535 |
| OG0002092 | CRL1506_000404                 | CRL681_002322                | MPL16_001677               | TL2766_002568                | WCFS1_002450               |
| OG0002093 | CRL1506_000405                 | CRL681_002323                | MPL16_001676               | TL2766_002569                | WCFS1_002451               |
| OG0003469 |                                |                              |                            |                              | WCFS1_002452               |
| OG0002611 |                                | CRL681_000003                | MPL16_000256, MPL16_000333 |                              | WCFS1_002453               |
| OG0003491 |                                |                              |                            |                              | WCFS1_002454               |
| OG0002754 |                                | CRL681_002324                |                            | TL2766_002570                | WCFS1_002455               |
| OG0002094 | CRL1506_000406                 | CRL681_002325                | MPL16_000956               | TL2766_002571                | WCFS1_002456               |
| OG0002095 | CRL1506_000407                 | CRL681_002326                | MPL16_000955               | TL2766_002572                | WCFS1_002457               |
| OG0000235 | CRL1506_000408                 | CRL681_002327                | MPL16_000954, MPL16_001122 | TL2766_002573                | WCFS1_002458               |
| OG0002096 | CRL1506_000409                 | CRL681_002328                | MPL16_000953               | TL2766_002574                | WCFS1_002459               |
| OG0002097 | CRL1506_000410                 | CRL681_002329                | MPL16_000952               | TL2766_002575                | WCFS1_002460               |
| OG0002098 | CRL1506_000411                 | CRL681_002330                | MPL16_000951               | TL2766_002576                | WCFS1_002461               |
| OG0002885 | CRL1506_000413                 |                              |                            |                              | WCFS1_002463               |
| OG0002099 | CRL1506_000414                 | CRL681_002333                | MPL16_000939               | TL2766_002579                | WCFS1_002464               |
| OG0002100 | CRL1506_000415                 | CRL681_002334                | MPL16_000940               | TL2766_002580                | WCFS1_002465               |
| OG0002101 | CRL1506_000416                 | CRL681_002335                | MPL16_000941               | TL2766_002581                | WCFS1_002466               |

|           |                |               |              |                              |              |
|-----------|----------------|---------------|--------------|------------------------------|--------------|
| OG0002102 | CRL1506_000417 | CRL681_002336 | MPL16_000942 | TL2766_002582                | WCFS1_002467 |
| OG0002581 | CRL1506_000418 | CRL681_002337 | MPL16_000943 |                              | WCFS1_002468 |
| OG0002103 | CRL1506_000419 | CRL681_002338 | MPL16_000944 | TL2766_002584                | WCFS1_002469 |
| OG0002104 | CRL1506_000420 | CRL681_002340 | MPL16_000946 | TL2766_002586                | WCFS1_002470 |
| OG0002105 | CRL1506_000421 | CRL681_002341 | MPL16_000947 | TL2766_002587                | WCFS1_002471 |
| OG0002106 | CRL1506_000422 | CRL681_002342 | MPL16_000948 | TL2766_002588                | WCFS1_002472 |
| OG0002107 | CRL1506_000423 | CRL681_002343 | MPL16_000949 | TL2766_002589                | WCFS1_002473 |
| OG0002108 | CRL1506_000424 | CRL681_002344 | MPL16_000950 | TL2766_002590                | WCFS1_002474 |
| OG0002109 | CRL1506_000425 | CRL681_002345 | MPL16_001146 | TL2766_002591                | WCFS1_002475 |
| OG0002110 | CRL1506_000426 | CRL681_002346 | MPL16_001147 | TL2766_002592                | WCFS1_002476 |
| OG0003057 |                |               |              | TL2766_002302                | WCFS1_002478 |
| OG0002111 | CRL1506_000427 | CRL681_002347 | MPL16_001148 | TL2766_002593                | WCFS1_002479 |
| OG0002112 | CRL1506_000428 | CRL681_002348 | MPL16_001149 | TL2766_002594                | WCFS1_002480 |
| OG0002113 | CRL1506_000429 | CRL681_002349 | MPL16_001150 | TL2766_002595                | WCFS1_002481 |
| OG0002114 | CRL1506_000430 | CRL681_002350 | MPL16_001151 | TL2766_002596                | WCFS1_002482 |
| OG0002582 | CRL1506_000431 |               | MPL16_001152 | TL2766_002597                | WCFS1_002483 |
| OG0002115 | CRL1506_000432 | CRL681_002352 | MPL16_001153 | TL2766_002598                | WCFS1_002484 |
| OG0002116 | CRL1506_000433 | CRL681_002353 | MPL16_001154 | TL2766_002599                | WCFS1_002485 |
| OG0002117 | CRL1506_000434 | CRL681_002354 | MPL16_002610 | TL2766_002600                | WCFS1_002486 |
| OG0002118 | CRL1506_000435 | CRL681_002355 | MPL16_002609 | TL2766_002601                | WCFS1_002487 |
| OG0002119 | CRL1506_000436 | CRL681_002356 | MPL16_002608 | TL2766_002602                | WCFS1_002488 |
| OG0002120 | CRL1506_000437 | CRL681_002357 | MPL16_002607 | TL2766_002603                | WCFS1_002489 |
| OG0002121 | CRL1506_000438 | CRL681_002358 | MPL16_002606 | TL2766_002604                | WCFS1_002490 |
| OG0002122 | CRL1506_000439 | CRL681_002359 | MPL16_002605 | TL2766_002605                | WCFS1_002491 |
| OG0002123 | CRL1506_000440 | CRL681_002360 | MPL16_002604 | TL2766_002606                | WCFS1_002492 |
| OG0002583 | CRL1506_000442 | CRL681_002362 |              | TL2766_002608                | WCFS1_002494 |
| OG0002124 | CRL1506_000443 | CRL681_002363 | MPL16_001814 | TL2766_002609                | WCFS1_002495 |
| OG0002125 | CRL1506_000444 | CRL681_002364 | MPL16_001815 | TL2766_002610                | WCFS1_002496 |
| OG0002126 | CRL1506_000445 | CRL681_002365 | MPL16_001816 | TL2766_002611                | WCFS1_002497 |
| OG0002127 | CRL1506_000446 | CRL681_002366 | MPL16_001817 | TL2766_002612                | WCFS1_002498 |
| OG0002128 | CRL1506_000447 | CRL681_002367 |              | TL2766_002232, TL2766_002321 | WCFS1_002499 |
| OG0002584 | CRL1506_000448 | CRL681_002368 |              | TL2766_002233                | WCFS1_002500 |
| OG0002129 | CRL1506_000449 | CRL681_002369 | MPL16_001818 | TL2766_002234                | WCFS1_002501 |

|           |                |               |                            |                              |              |
|-----------|----------------|---------------|----------------------------|------------------------------|--------------|
| OG0002130 | CRL1506_000450 | CRL681_002370 | MPL16_001819               | TL2766_002235                | WCFS1_002502 |
| OG0002585 | CRL1506_000451 | CRL681_002371 |                            | TL2766_002236                | WCFS1_002503 |
| OG0002131 | CRL1506_000452 | CRL681_002372 | MPL16_001821               | TL2766_002237                | WCFS1_002504 |
| OG0002132 | CRL1506_000453 | CRL681_002373 | MPL16_001822               | TL2766_002238                | WCFS1_002505 |
| OG0002133 | CRL1506_000454 | CRL681_002374 | MPL16_001823               | TL2766_002239                | WCFS1_002506 |
| OG0002134 | CRL1506_000455 | CRL681_002375 | MPL16_001824               | TL2766_002240                | WCFS1_002507 |
| OG0002135 | CRL1506_000456 | CRL681_002376 | MPL16_001825               | TL2766_002241                | WCFS1_002508 |
| OG0002136 | CRL1506_000457 | CRL681_002377 |                            | TL2766_002156, TL2766_002242 | WCFS1_002509 |
| OG0002740 | CRL1506_000458 | CRL681_002378 |                            |                              | WCFS1_002510 |
| OG0002137 | CRL1506_000459 | CRL681_002379 | MPL16_001826               | TL2766_002244                | WCFS1_002511 |
| OG0002138 | CRL1506_000460 | CRL681_002380 | MPL16_001827               | TL2766_002245                | WCFS1_002512 |
| OG0002139 | CRL1506_000461 | CRL681_002381 | MPL16_001829               | TL2766_002248                | WCFS1_002513 |
| OG0000236 | CRL1506_000462 | CRL681_002382 | MPL16_001830, MPL16_002203 | TL2766_002249                | WCFS1_002514 |
| OG0002140 | CRL1506_000465 | CRL681_002385 | MPL16_001835               | TL2766_002252                | WCFS1_002517 |
| OG0002141 | CRL1506_000466 | CRL681_002386 | MPL16_001836               | TL2766_002253                | WCFS1_002518 |
| OG0002142 | CRL1506_000467 | CRL681_002387 | MPL16_001837               | TL2766_002254                | WCFS1_002519 |
| OG0002586 | CRL1506_000468 | CRL681_002388 |                            | TL2766_002255                | WCFS1_002520 |
| OG0002587 | CRL1506_000469 | CRL681_002389 |                            | TL2766_002256                | WCFS1_002521 |
| OG0002588 | CRL1506_000470 | CRL681_002390 |                            | TL2766_002257                | WCFS1_002522 |
| OG0002589 | CRL1506_000471 | CRL681_002391 |                            | TL2766_002258                | WCFS1_002523 |
| OG0002143 | CRL1506_000473 | CRL681_002393 | MPL16_001840               | TL2766_002260                | WCFS1_002525 |
| OG0002144 | CRL1506_000474 | CRL681_002394 | MPL16_001841               | TL2766_002261                | WCFS1_002526 |
| OG0002145 | CRL1506_000475 | CRL681_002395 | MPL16_001842               | TL2766_002262                | WCFS1_002527 |
| OG0002146 | CRL1506_000476 | CRL681_002396 | MPL16_001843               | TL2766_002263                | WCFS1_002528 |
| OG0002147 | CRL1506_000477 | CRL681_002397 | MPL16_001844               | TL2766_002264                | WCFS1_002529 |
| OG0002148 | CRL1506_000478 | CRL681_002398 | MPL16_001846               | TL2766_002265                | WCFS1_002530 |
| OG0002149 | CRL1506_000479 | CRL681_002399 | MPL16_001847               | TL2766_002266                | WCFS1_002531 |
| OG0002150 | CRL1506_000480 | CRL681_002400 | MPL16_001848               | TL2766_002267                | WCFS1_002532 |
| OG0002151 | CRL1506_000481 | CRL681_002401 | MPL16_001850               | TL2766_002268                | WCFS1_002533 |
| OG0002152 | CRL1506_000482 | CRL681_002402 | MPL16_001851               | TL2766_002269                | WCFS1_002534 |
| OG0002153 | CRL1506_000484 | CRL681_002404 | MPL16_001853               | TL2766_002271                | WCFS1_002536 |
| OG0002154 | CRL1506_000485 | CRL681_002405 | MPL16_001854               | TL2766_002272                | WCFS1_002537 |

|           |                |                                             |              |               |                            |
|-----------|----------------|---------------------------------------------|--------------|---------------|----------------------------|
| OG0000103 | CRL1506_000487 | CRL681_001851, CRL681_002407                | MPL16_001856 | TL2766_002274 | WCFS1_002539, WCFS1_003129 |
| OG0001226 | CRL1506_002016 | CRL681_002408                               | MPL16_001857 | TL2766_002656 | WCFS1_002540               |
| OG0001227 | CRL1506_002017 | CRL681_002409                               | MPL16_001858 | TL2766_002655 | WCFS1_002541               |
| OG0000086 | CRL1506_002018 | CRL681_001908, CRL681_001910, CRL681_002410 | MPL16_001859 | TL2766_002654 | WCFS1_002542               |
| OG0001228 | CRL1506_002019 | CRL681_002411                               | MPL16_001860 | TL2766_002653 | WCFS1_002543               |
| OG0001229 | CRL1506_002020 | CRL681_002412                               | MPL16_001861 | TL2766_002652 | WCFS1_002544               |
| OG0001230 | CRL1506_002021 | CRL681_002413                               | MPL16_001862 | TL2766_002651 | WCFS1_002545               |
| OG0001231 | CRL1506_002022 | CRL681_002414                               | MPL16_001863 | TL2766_002650 | WCFS1_002546               |
| OG0001232 | CRL1506_002023 | CRL681_002415                               | MPL16_001864 | TL2766_002649 | WCFS1_002547               |
| OG0001233 | CRL1506_002024 | CRL681_002416                               | MPL16_001865 | TL2766_002648 | WCFS1_002548               |
| OG0001234 | CRL1506_002025 | CRL681_002417                               | MPL16_001866 | TL2766_002647 | WCFS1_002549               |
| OG0001235 | CRL1506_002026 | CRL681_002418                               | MPL16_001867 | TL2766_002646 | WCFS1_002550               |
| OG0001236 | CRL1506_002028 | CRL681_002420                               | MPL16_001869 | TL2766_002644 | WCFS1_002552               |
| OG0001237 | CRL1506_002029 | CRL681_002421                               | MPL16_001870 | TL2766_002643 | WCFS1_002553               |
| OG0001238 | CRL1506_002030 | CRL681_002422                               | MPL16_001871 | TL2766_002642 | WCFS1_002554               |
| OG0001239 | CRL1506_002031 | CRL681_002423                               | MPL16_001872 | TL2766_002641 | WCFS1_002555               |
| OG0001240 | CRL1506_002032 | CRL681_002424                               | MPL16_003149 | TL2766_002640 | WCFS1_002556               |
| OG0001241 | CRL1506_002033 | CRL681_002425                               | MPL16_000456 | TL2766_002639 | WCFS1_002557               |
| OG0001242 | CRL1506_002034 | CRL681_002426                               | MPL16_000457 | TL2766_002638 | WCFS1_002558               |
| OG0001243 | CRL1506_002035 | CRL681_002427                               | MPL16_000458 | TL2766_002637 | WCFS1_002559               |
| OG0001244 | CRL1506_002036 | CRL681_002428                               | MPL16_000459 | TL2766_002636 | WCFS1_002560               |
| OG0001245 | CRL1506_002037 | CRL681_002429                               | MPL16_000460 | TL2766_002635 | WCFS1_002561               |
| OG0001246 | CRL1506_002038 | CRL681_002430                               | MPL16_001102 | TL2766_002634 | WCFS1_002562               |
| OG0002437 | CRL1506_002039 | CRL681_002431                               |              | TL2766_002633 | WCFS1_002563               |
| OG0001247 | CRL1506_002042 | CRL681_002434                               | MPL16_001106 | TL2766_002630 | WCFS1_002566               |
| OG0001248 | CRL1506_002043 | CRL681_002435                               | MPL16_001107 | TL2766_002629 | WCFS1_002567               |
| OG0001249 | CRL1506_002045 | CRL681_002437                               | MPL16_001109 | TL2766_002627 | WCFS1_002569               |
| OG0001250 | CRL1506_002046 | CRL681_002438                               | MPL16_003117 | TL2766_002626 | WCFS1_002570               |
| OG0001251 | CRL1506_002047 | CRL681_002439                               | MPL16_003116 | TL2766_002625 | WCFS1_002571               |
| OG0001252 | CRL1506_002048 | CRL681_002440                               | MPL16_000465 | TL2766_002624 | WCFS1_002573               |
| OG0001778 | CRL1506_002901 | CRL681_002441                               | MPL16_000466 | TL2766_002623 | WCFS1_002574               |

|           |                |                              |                            |               |              |
|-----------|----------------|------------------------------|----------------------------|---------------|--------------|
| OG0001777 | CRL1506_002900 | CRL681_002442                | MPL16_000467               | TL2766_002622 | WCFS1_002575 |
| OG0001776 | CRL1506_002898 | CRL681_002444                | MPL16_000469               | TL2766_002620 | WCFS1_002577 |
| OG0001775 | CRL1506_002897 | CRL681_002445                | MPL16_000470               | TL2766_002619 | WCFS1_002578 |
| OG0001774 | CRL1506_002895 | CRL681_002447                | MPL16_000473               | TL2766_002617 | WCFS1_002579 |
| OG0002553 | CRL1506_002894 |                              | MPL16_000474               | TL2766_002616 | WCFS1_002580 |
| OG0001773 | CRL1506_002893 | CRL681_002449                | MPL16_000475               | TL2766_002615 | WCFS1_002581 |
| OG0001772 | CRL1506_002892 | CRL681_002450                | MPL16_000476               | TL2766_002614 | WCFS1_002582 |
| OG0002756 |                | CRL681_002451                | MPL16_000477               |               | WCFS1_002583 |
| OG0002340 |                | CRL681_001913, CRL681_002452 | MPL16_000478               | TL2766_002231 | WCFS1_002584 |
| OG0000222 | CRL1506_002889 | CRL681_002453                | MPL16_001115, MPL16_002647 | TL2766_002230 | WCFS1_002585 |
| OG0001771 | CRL1506_002888 | CRL681_002454                | MPL16_002646               | TL2766_002229 | WCFS1_002586 |
| OG0000215 | CRL1506_002887 | CRL681_002455                | MPL16_001113, MPL16_002645 | TL2766_002228 | WCFS1_002587 |
| OG0002552 | CRL1506_002886 | CRL681_002456                |                            | TL2766_002227 | WCFS1_002588 |
| OG0001770 | CRL1506_002885 | CRL681_002457                | MPL16_002643               | TL2766_002226 | WCFS1_002589 |
| OG0001769 | CRL1506_002884 | CRL681_002458                | MPL16_002640               | TL2766_002225 | WCFS1_002590 |
| OG0000221 | CRL1506_002883 | CRL681_002459                | MPL16_002010, MPL16_002639 | TL2766_002224 | WCFS1_002591 |
| OG0001768 | CRL1506_002882 | CRL681_002460                | MPL16_002265               | TL2766_002223 | WCFS1_002592 |
| OG0001767 | CRL1506_002881 | CRL681_002461                | MPL16_002264               | TL2766_002222 | WCFS1_002593 |
| OG0001766 | CRL1506_002880 | CRL681_002462                | MPL16_002263               | TL2766_002221 | WCFS1_002594 |
| OG0002550 | CRL1506_002878 | CRL681_002464                |                            | TL2766_002218 | WCFS1_002596 |
| OG0002549 | CRL1506_002877 | CRL681_002465                |                            | TL2766_002217 | WCFS1_002597 |
| OG0001765 | CRL1506_002876 | CRL681_002466                | MPL16_001722               | TL2766_002216 | WCFS1_002598 |
| OG0001764 | CRL1506_002875 | CRL681_002467                | MPL16_001723               | TL2766_002215 | WCFS1_002599 |
| OG0001763 | CRL1506_002874 | CRL681_002468                | MPL16_001724               | TL2766_002214 | WCFS1_002600 |
| OG0001812 | CRL1506_002873 | CRL681_002469                | MPL16_003125               | TL2766_002213 | WCFS1_002601 |
| OG0001762 | CRL1506_002872 | CRL681_002470                | MPL16_003126               | TL2766_002212 | WCFS1_002602 |
| OG0002548 | CRL1506_002871 | CRL681_002471                |                            | TL2766_002211 | WCFS1_002603 |
| OG0001761 | CRL1506_002870 | CRL681_002472                | MPL16_003128               | TL2766_002210 | WCFS1_002604 |
| OG0003035 |                |                              | MPL16_003129               |               | WCFS1_002605 |
| OG0003036 |                |                              | MPL16_003130               |               | WCFS1_002606 |



|           |                                |                              |                                          |                              |                            |
|-----------|--------------------------------|------------------------------|------------------------------------------|------------------------------|----------------------------|
| OG0000214 | CRL1506_002869                 | CRL681_002473                | MPL16_000464, MPL16_003131               | TL2766_002209                | WCFS1_002607               |
| OG0000213 | CRL1506_002868                 | CRL681_002474                | MPL16_002104, MPL16_003132               | TL2766_002208                | WCFS1_002608               |
| OG0001760 | CRL1506_002867                 | CRL681_002475                | MPL16_003133                             | TL2766_002207                | WCFS1_002609               |
| OG0000017 | CRL1506_002496, CRL1506_002865 | CRL681_002477, CRL681_002971 | MPL16_001664, MPL16_003109, MPL16_003134 | TL2766_001806, TL2766_002205 | WCFS1_002611, WCFS1_003016 |
| OG0000038 | CRL1506_002495, CRL1506_002864 | CRL681_002478, CRL681_002970 | MPL16_001663, MPL16_003110, MPL16_003135 | TL2766_002204                | WCFS1_002612, WCFS1_003017 |
| OG0001759 | CRL1506_002863                 | CRL681_002479                | MPL16_003136                             | TL2766_002203                | WCFS1_002613               |
| OG0001758 | CRL1506_002862                 | CRL681_002480                | MPL16_003137                             | TL2766_002202                | WCFS1_002614               |
| OG0001757 | CRL1506_002861                 | CRL681_002481                | MPL16_003138                             | TL2766_002201                | WCFS1_002615               |
| OG0001811 | CRL1506_002860                 | CRL681_002482                | MPL16_003139                             | TL2766_002200                | WCFS1_002616               |
| OG0001756 | CRL1506_002859                 | CRL681_002483                | MPL16_003141                             | TL2766_002199                | WCFS1_002617               |
| OG0001755 | CRL1506_002858                 | CRL681_002484                | MPL16_003142                             | TL2766_002198                | WCFS1_002618               |
| OG0001754 | CRL1506_002857                 | CRL681_002485                | MPL16_003143                             | TL2766_002197                | WCFS1_002619               |
| OG0001753 | CRL1506_002856                 | CRL681_002486                | MPL16_002193                             | TL2766_002196                | WCFS1_002620               |
| OG0001752 | CRL1506_002855                 | CRL681_002487                | MPL16_003224                             | TL2766_002195                | WCFS1_002621               |
| OG0002733 | CRL1506_002854                 | CRL681_002488                |                                          |                              | WCFS1_002622               |
| OG0000022 | CRL1506_000841, CRL1506_002853 | CRL681_002489, CRL681_003169 | MPL16_002095, MPL16_002393               | TL2766_000520, TL2766_002194 | WCFS1_002623, WCFS1_002795 |
| OG0001751 | CRL1506_002852                 | CRL681_002490                | MPL16_002096                             | TL2766_002191                | WCFS1_002624               |
| OG0001750 | CRL1506_002851                 | CRL681_002491                | MPL16_002097                             | TL2766_002190                | WCFS1_002625               |
| OG0001810 | CRL1506_002850                 | CRL681_002492                | MPL16_002098                             | TL2766_002189                | WCFS1_002626               |
| OG0000212 | CRL1506_002849                 | CRL681_002493                | MPL16_002067, MPL16_002099               | TL2766_002188                | WCFS1_002627               |
| OG0001749 | CRL1506_002848                 | CRL681_002494                | MPL16_002068                             | TL2766_002187                | WCFS1_002628               |
| OG0000211 | CRL1506_002847                 | CRL681_002495                | MPL16_000328, MPL16_002069               | TL2766_002186                | WCFS1_002629               |
| OG0002547 | CRL1506_002846                 | CRL681_002496                |                                          | TL2766_002185                | WCFS1_002630               |
| OG0002732 | CRL1506_002845                 |                              |                                          | TL2766_002184                | WCFS1_002631               |

|           |                |                              |                            |                              |                            |
|-----------|----------------|------------------------------|----------------------------|------------------------------|----------------------------|
| OG0000210 | CRL1506_002844 | CRL681_001917, CRL681_002498 | MPL16_002070               | TL2766_002183                | WCFS1_002632               |
| OG0000209 | CRL1506_002843 | CRL681_002499                | MPL16_001096, MPL16_002071 | TL2766_002182                | WCFS1_002633               |
| OG0002546 | CRL1506_002842 |                              | MPL16_002074               | TL2766_002181                | WCFS1_002634               |
| OG0002545 | CRL1506_002841 |                              | MPL16_002075               | TL2766_002180                | WCFS1_002635               |
| OG0002544 | CRL1506_002840 |                              | MPL16_002076               | TL2766_002179                | WCFS1_002636               |
| OG0002543 | CRL1506_002839 |                              | MPL16_001223               | TL2766_002178                | WCFS1_002637               |
| OG0002542 | CRL1506_002838 |                              | MPL16_001222               | TL2766_002177                | WCFS1_002638               |
| OG0002664 |                |                              | MPL16_000091, MPL16_001221 | TL2766_002176                | WCFS1_002639               |
| OG0002431 | CRL1506_001861 | CRL681_002500                |                            | TL2766_002175                | WCFS1_002640               |
| OG0002430 | CRL1506_001860 | CRL681_002501                |                            | TL2766_002174                | WCFS1_002641               |
| OG0002429 | CRL1506_001859 |                              | MPL16_001217               | TL2766_002173                | WCFS1_002642               |
| OG0001111 | CRL1506_001858 | CRL681_002503                | MPL16_001216               | TL2766_002172                | WCFS1_002643               |
| OG0001110 | CRL1506_001857 | CRL681_002504                | MPL16_001215               | TL2766_002171                | WCFS1_002644               |
| OG0001109 | CRL1506_001856 | CRL681_002505                | MPL16_001697               | TL2766_002170                | WCFS1_002645               |
| OG0001108 | CRL1506_001855 | CRL681_002506                | MPL16_000447               | TL2766_002169                | WCFS1_002646               |
| OG0000165 | CRL1506_001854 | CRL681_000017, CRL681_002507 | MPL16_000448               | TL2766_002168                | WCFS1_002647               |
| OG0003045 |                |                              | MPL16_000449               |                              | WCFS1_002648               |
| OG0003470 |                |                              |                            |                              | WCFS1_002649               |
| OG0002427 | CRL1506_001847 | CRL681_001901                |                            | TL2766_002161                | WCFS1_002653               |
| OG0000092 | CRL1506_002530 | CRL681_002996                | MPL16_003177               | TL2766_001483, TL2766_001831 | WCFS1_002655, WCFS1_002981 |
| OG0000195 | CRL1506_002529 | CRL681_002995                | MPL16_003178               | TL2766_001830                | WCFS1_002656, WCFS1_002982 |
| OG0000091 | CRL1506_002528 | CRL681_002994                | MPL16_003179               | TL2766_001485, TL2766_001829 | WCFS1_002657, WCFS1_002983 |
| OG0001107 | CRL1506_001846 | CRL681_001902                | MPL16_001589               | TL2766_002160                | WCFS1_002658               |
| OG0002701 | CRL1506_001845 | CRL681_001903                |                            |                              | WCFS1_002659               |
| OG0002700 | CRL1506_001844 | CRL681_001904                |                            |                              | WCFS1_002660               |
| OG0002699 | CRL1506_001843 |                              |                            | TL2766_002155                | WCFS1_002661               |
| OG0002698 | CRL1506_001839 |                              |                            | TL2766_002153                | WCFS1_002663               |

|           |                |               |                            |                              |                            |
|-----------|----------------|---------------|----------------------------|------------------------------|----------------------------|
| OG0002822 | CRL1506_001838 |               |                            |                              | WCFS1_002664               |
| OG0000164 | CRL1506_001837 |               | MPL16_001668               | TL2766_002150, TL2766_002151 | WCFS1_002665, WCFS1_002666 |
| OG0002697 | CRL1506_001836 |               |                            | TL2766_002149                | WCFS1_002667               |
| OG0002696 | CRL1506_001833 |               |                            | TL2766_002146                | WCFS1_002670               |
| OG0002695 | CRL1506_001832 |               |                            | TL2766_002145                | WCFS1_002671               |
| OG0002694 | CRL1506_001831 |               |                            | TL2766_002144                | WCFS1_002672               |
| OG0002693 | CRL1506_001830 |               |                            | TL2766_002143                | WCFS1_002673               |
| OG0002821 | CRL1506_001829 |               |                            |                              | WCFS1_002674               |
| OG0002692 | CRL1506_001828 |               |                            | TL2766_002142                | WCFS1_002675               |
| OG0001106 | CRL1506_001827 | CRL681_001926 | MPL16_002184               | TL2766_002141                | WCFS1_002676               |
| OG0001105 | CRL1506_001826 | CRL681_001927 | MPL16_002187               | TL2766_002140                | WCFS1_002677               |
| OG0001104 | CRL1506_001825 | CRL681_001928 | MPL16_002188               | TL2766_002139                | WCFS1_002678               |
| OG0001103 | CRL1506_001824 | CRL681_001929 | MPL16_002189               | TL2766_002138                | WCFS1_002679               |
| OG0001102 | CRL1506_001823 | CRL681_001930 | MPL16_002190               | TL2766_002137                | WCFS1_002680               |
| OG0001101 | CRL1506_001822 | CRL681_001931 | MPL16_002191               | TL2766_002136                | WCFS1_002681               |
| OG0001100 | CRL1506_001821 | CRL681_001932 | MPL16_002192               | TL2766_002135                | WCFS1_002682               |
| OG0001099 | CRL1506_001820 | CRL681_001933 | MPL16_002195               | TL2766_002134                | WCFS1_002683               |
| OG0000163 | CRL1506_001819 | CRL681_001934 | MPL16_001588, MPL16_002196 | TL2766_002133                | WCFS1_002684               |
| OG0001098 | CRL1506_001818 | CRL681_001935 | MPL16_002197               | TL2766_002132                | WCFS1_002685               |
| OG0001097 | CRL1506_001817 | CRL681_001936 | MPL16_002198               | TL2766_002131                | WCFS1_002686               |
| OG0001096 | CRL1506_001814 | CRL681_001939 | MPL16_002200               | TL2766_002129                | WCFS1_002688               |
| OG0001095 | CRL1506_001813 | CRL681_001940 | MPL16_002201               | TL2766_002128                | WCFS1_002689               |
| OG0001094 | CRL1506_001812 | CRL681_001941 | MPL16_002202               | TL2766_002127                | WCFS1_002690               |
| OG0001093 | CRL1506_001811 | CRL681_001942 | MPL16_002205               | TL2766_002126                | WCFS1_002691               |
| OG0000162 | CRL1506_001810 | CRL681_001943 | MPL16_001118, MPL16_002206 | TL2766_002125                | WCFS1_002692               |
| OG0000161 | CRL1506_001809 | CRL681_001944 | MPL16_001117, MPL16_002207 | TL2766_002124                | WCFS1_002693               |
| OG0002425 | CRL1506_001808 | CRL681_001945 |                            | TL2766_002123                | WCFS1_002694               |
| OG0001092 | CRL1506_001807 | CRL681_001946 | MPL16_002208               | TL2766_002122                | WCFS1_002695               |
| OG0001091 | CRL1506_001806 | CRL681_001947 | MPL16_002209               | TL2766_002121                | WCFS1_002696               |
| OG0001090 | CRL1506_001805 | CRL681_001948 | MPL16_002210               | TL2766_002120                | WCFS1_002697               |

|           |                                |                              |                                          |                              |                            |
|-----------|--------------------------------|------------------------------|------------------------------------------|------------------------------|----------------------------|
| OG0001089 | CRL1506_001804                 | CRL681_001949                | MPL16_002211                             | TL2766_002119                | WCFS1_002698               |
| OG0001088 | CRL1506_001803                 | CRL681_001950                | MPL16_002212                             | TL2766_002118                | WCFS1_002699               |
| OG0001087 | CRL1506_001802                 | CRL681_001951                | MPL16_002213                             | TL2766_002117                | WCFS1_002700               |
| OG0001086 | CRL1506_001801                 | CRL681_001952                | MPL16_002214                             | TL2766_002116                | WCFS1_002701               |
| OG0001085 | CRL1506_001800                 | CRL681_001953                | MPL16_002215                             | TL2766_002115                | WCFS1_002702               |
| OG0001084 | CRL1506_001799                 | CRL681_001954                | MPL16_001795                             | TL2766_002114                | WCFS1_002703               |
| OG0001083 | CRL1506_001798                 | CRL681_001955                | MPL16_001794                             | TL2766_002113                | WCFS1_002704               |
| OG0001082 | CRL1506_001796                 | CRL681_001956                | MPL16_001792                             | TL2766_002111                | WCFS1_002705               |
| OG0001081 | CRL1506_001795                 | CRL681_001957                | MPL16_001791                             | TL2766_002110                | WCFS1_002706               |
| OG0001080 | CRL1506_001794                 | CRL681_001958                | MPL16_001790                             | TL2766_002109                | WCFS1_002707               |
| OG0000033 | CRL1506_001790, CRL1506_001793 | CRL681_001959, CRL681_001962 | MPL16_001786, MPL16_001789               | TL2766_002105, TL2766_002108 | WCFS1_002708, WCFS1_002711 |
| OG0001117 | CRL1506_001792                 | CRL681_001960                | MPL16_001788                             | TL2766_002107                | WCFS1_002709               |
| OG0001079 | CRL1506_001791                 | CRL681_001961                | MPL16_001787                             | TL2766_002106                | WCFS1_002710               |
| OG0000083 | CRL1506_001788                 | CRL681_001964                | MPL16_001235, MPL16_001454, MPL16_001785 | TL2766_002103                | WCFS1_002713               |
| OG0001078 | CRL1506_001787                 | CRL681_001965                | MPL16_001784                             | TL2766_002102                | WCFS1_002714               |
| OG0001077 | CRL1506_001786                 | CRL681_001966                | MPL16_001783                             | TL2766_002101                | WCFS1_002715               |
| OG0001076 | CRL1506_001785                 | CRL681_000550                | MPL16_001780                             | TL2766_002100                | WCFS1_002716               |
| OG0001075 | CRL1506_001784                 | CRL681_000549                | MPL16_001779                             | TL2766_002099                | WCFS1_002717               |
| OG0001074 | CRL1506_001783                 | CRL681_000548                | MPL16_001778                             | TL2766_002098                | WCFS1_002718               |
| OG0001073 | CRL1506_001782                 | CRL681_000547                | MPL16_001777                             | TL2766_002097                | WCFS1_002719               |
| OG0001072 | CRL1506_001781                 | CRL681_000546                | MPL16_001776                             | TL2766_002096                | WCFS1_002720               |
| OG0001071 | CRL1506_001780                 | CRL681_000545                | MPL16_001775                             | TL2766_002095                | WCFS1_002721               |
| OG0001070 | CRL1506_001779                 | CRL681_000544                | MPL16_001774                             | TL2766_002094                | WCFS1_002722               |
| OG0001069 | CRL1506_001778                 | CRL681_000543                | MPL16_001773                             | TL2766_002093                | WCFS1_002723               |
| OG0003016 |                                |                              | MPL16_001772                             |                              | WCFS1_002724               |
| OG0003015 |                                |                              | MPL16_001770                             |                              | WCFS1_002726               |
| OG0003014 |                                |                              | MPL16_001769                             |                              | WCFS1_002727               |
| OG0003013 |                                |                              | MPL16_001768                             |                              | WCFS1_002728               |
| OG0001068 | CRL1506_001777                 | CRL681_000542                | MPL16_001767                             | TL2766_002092                | WCFS1_002729               |
| OG0000160 | CRL1506_001776                 | CRL681_000541                | MPL16_001766, MPL16_001832               | TL2766_002091                | WCFS1_002730               |

|           |                |               |                            |                              |              |
|-----------|----------------|---------------|----------------------------|------------------------------|--------------|
| OG0001067 | CRL1506_001769 | CRL681_000534 | MPL16_001765               | TL2766_002084                | WCFS1_002731 |
| OG0001116 | CRL1506_001768 | CRL681_000533 | MPL16_001764               | TL2766_002083                | WCFS1_002732 |
| OG0001066 | CRL1506_001766 | CRL681_000531 | MPL16_001762               | TL2766_002081                | WCFS1_002734 |
| OG0001065 | CRL1506_001765 | CRL681_000530 | MPL16_001761               | TL2766_002080                | WCFS1_002735 |
| OG0000159 | CRL1506_001764 | CRL681_000529 | MPL16_001281, MPL16_001760 | TL2766_002079                | WCFS1_002736 |
| OG0001064 | CRL1506_001763 | CRL681_000528 | MPL16_001759               | TL2766_002078                | WCFS1_002737 |
| OG0001063 | CRL1506_001762 | CRL681_000527 | MPL16_001699               | TL2766_002077                | WCFS1_002738 |
| OG0001062 | CRL1506_001761 | CRL681_000526 | MPL16_001698               | TL2766_002076                | WCFS1_002739 |
| OG0002423 | CRL1506_001760 | CRL681_000525 |                            | TL2766_002075                | WCFS1_002740 |
| OG0001061 | CRL1506_001759 | CRL681_000524 | MPL16_000242               | TL2766_002074                | WCFS1_002741 |
| OG0001060 | CRL1506_001758 | CRL681_000523 | MPL16_000241               | TL2766_002073                | WCFS1_002742 |
| OG0001115 | CRL1506_001757 | CRL681_000522 | MPL16_000240               | TL2766_002072                | WCFS1_002743 |
| OG0001059 | CRL1506_001756 | CRL681_000521 | MPL16_000239               | TL2766_002071                | WCFS1_002744 |
| OG0001058 | CRL1506_001755 | CRL681_000520 | MPL16_000238               | TL2766_002070                | WCFS1_002745 |
| OG0001057 | CRL1506_001754 | CRL681_000519 | MPL16_000237               | TL2766_002069                | WCFS1_002746 |
| OG0001056 | CRL1506_001753 | CRL681_000518 | MPL16_000236               | TL2766_002068                | WCFS1_002747 |
| OG0001055 | CRL1506_001752 | CRL681_000517 | MPL16_003226               | TL2766_002067                | WCFS1_002748 |
| OG0001054 | CRL1506_001751 | CRL681_000516 | MPL16_002270               | TL2766_002066                | WCFS1_002749 |
| OG0001053 | CRL1506_001750 | CRL681_000515 | MPL16_002271               | TL2766_002065                | WCFS1_002750 |
| OG0001052 | CRL1506_001749 | CRL681_000514 | MPL16_002272               | TL2766_002064                | WCFS1_002751 |
| OG0001051 | CRL1506_001748 | CRL681_000513 | MPL16_002273               | TL2766_002063                | WCFS1_002752 |
| OG0001050 | CRL1506_001747 | CRL681_000512 | MPL16_002274               | TL2766_002062                | WCFS1_002753 |
| OG0001049 | CRL1506_001746 | CRL681_000511 | MPL16_002275               | TL2766_002061                | WCFS1_002754 |
| OG0001048 | CRL1506_001745 | CRL681_000510 | MPL16_002276               | TL2766_002060                | WCFS1_002755 |
| OG0001047 | CRL1506_001744 | CRL681_000509 | MPL16_002277               | TL2766_002059                | WCFS1_002756 |
| OG0001114 | CRL1506_001743 | CRL681_000508 | MPL16_002278               | TL2766_002058                | WCFS1_002757 |
| OG0001046 | CRL1506_001742 | CRL681_000507 | MPL16_002279               | TL2766_002057                | WCFS1_002758 |
| OG0001045 | CRL1506_001741 | CRL681_000506 | MPL16_002280               | TL2766_002056                | WCFS1_002759 |
| OG0001044 | CRL1506_001740 | CRL681_000505 | MPL16_002281               | TL2766_002055                | WCFS1_002760 |
| OG0002422 | CRL1506_001739 | CRL681_000504 |                            | TL2766_002054                | WCFS1_002761 |
| OG0001043 | CRL1506_001738 | CRL681_000503 | MPL16_002282               | TL2766_002053                | WCFS1_002762 |
| OG0001042 | CRL1506_001736 | CRL681_000501 |                            | TL2766_002051, TL2766_002955 | WCFS1_002764 |

|           |                |               |              |                                                |              |
|-----------|----------------|---------------|--------------|------------------------------------------------|--------------|
| OG0001041 | CRL1506_001735 | CRL681_000500 | MPL16_002287 | TL2766_002050                                  | WCFS1_002765 |
| OG0000079 | CRL1506_001734 | CRL681_000499 | MPL16_002288 | TL2766_001742, TL2766_002049,<br>TL2766_002301 | WCFS1_002766 |
| OG0002421 | CRL1506_001733 | CRL681_000498 |              | TL2766_002048                                  | WCFS1_002767 |
| OG0002420 | CRL1506_001732 | CRL681_000497 |              | TL2766_002047                                  | WCFS1_002768 |
| OG0001040 | CRL1506_001731 | CRL681_000496 | MPL16_003222 | TL2766_002046                                  | WCFS1_002769 |
| OG0001039 | CRL1506_001730 | CRL681_000495 | MPL16_003223 | TL2766_002045                                  | WCFS1_002770 |
| OG0001038 | CRL1506_001729 | CRL681_000494 | MPL16_000505 | TL2766_002044                                  | WCFS1_002771 |
| OG0002688 | CRL1506_001727 |               |              | TL2766_002042                                  | WCFS1_002773 |
| OG0001037 | CRL1506_001726 | CRL681_000493 | MPL16_000507 | TL2766_002041                                  | WCFS1_002774 |
| OG0001036 | CRL1506_001725 | CRL681_000492 | MPL16_003151 | TL2766_002040                                  | WCFS1_002775 |
| OG0001035 | CRL1506_001724 | CRL681_000491 | MPL16_003150 | TL2766_002039                                  | WCFS1_002776 |
| OG0002418 | CRL1506_001723 | CRL681_000490 |              | TL2766_002038                                  | WCFS1_002777 |
| OG0001034 | CRL1506_001722 | CRL681_000489 | MPL16_002627 | TL2766_002037                                  | WCFS1_002778 |
| OG0001033 | CRL1506_001721 | CRL681_000488 | MPL16_002628 | TL2766_002036                                  | WCFS1_002779 |
| OG0001032 | CRL1506_001720 | CRL681_000487 | MPL16_002629 | TL2766_002035                                  | WCFS1_002780 |
| OG0001113 | CRL1506_001719 | CRL681_000486 | MPL16_002630 | TL2766_002034                                  | WCFS1_002781 |
| OG0001031 | CRL1506_001718 | CRL681_000484 | MPL16_002631 | TL2766_002033                                  | WCFS1_002782 |
| OG0001112 | CRL1506_001717 | CRL681_000483 | MPL16_002632 | TL2766_002032                                  | WCFS1_002783 |
| OG0001030 | CRL1506_001716 | CRL681_000482 | MPL16_002633 | TL2766_002031                                  | WCFS1_002784 |
| OG0001029 | CRL1506_001715 | CRL681_000481 | MPL16_002634 | TL2766_002030                                  | WCFS1_002785 |
| OG0000362 | CRL1506_000835 | CRL681_003174 | MPL16_002388 | TL2766_000525                                  | WCFS1_002790 |
| OG0000363 | CRL1506_000836 | CRL681_003173 | MPL16_002389 | TL2766_000524                                  | WCFS1_002791 |
| OG0000364 | CRL1506_000837 | CRL681_003172 | MPL16_002390 | TL2766_000523                                  | WCFS1_002792 |
| OG0000365 | CRL1506_000838 | CRL681_003171 | MPL16_002391 | TL2766_000522                                  | WCFS1_002793 |
| OG0000366 | CRL1506_000840 | CRL681_003170 | MPL16_002392 | TL2766_000521                                  | WCFS1_002794 |
| OG0002617 |                | CRL681_003168 | MPL16_002394 | TL2766_000519                                  | WCFS1_002796 |
| OG0000367 | CRL1506_000843 | CRL681_003167 | MPL16_002395 | TL2766_000518                                  | WCFS1_002797 |
| OG0000368 | CRL1506_000844 | CRL681_003166 | MPL16_002396 | TL2766_000517                                  | WCFS1_002798 |
| OG0000369 | CRL1506_000845 | CRL681_003165 | MPL16_002397 | TL2766_000516                                  | WCFS1_002799 |
| OG0000370 | CRL1506_000846 | CRL681_003164 | MPL16_002398 | TL2766_000515                                  | WCFS1_002800 |
| OG0000371 | CRL1506_000847 | CRL681_003163 | MPL16_002399 | TL2766_000514                                  | WCFS1_002801 |
| OG0000372 | CRL1506_000848 | CRL681_003162 | MPL16_002400 | TL2766_000513                                  | WCFS1_002802 |

|           |                |                              |                            |                              |              |
|-----------|----------------|------------------------------|----------------------------|------------------------------|--------------|
| OG0000373 | CRL1506_000849 | CRL681_003161                | MPL16_002401               | TL2766_000512                | WCFS1_002803 |
| OG0002355 | CRL1506_000850 | CRL681_003160                |                            | TL2766_000511                | WCFS1_002805 |
| OG0000374 | CRL1506_000851 | CRL681_003159                | MPL16_002402               | TL2766_000510                | WCFS1_002806 |
| OG0000375 | CRL1506_000852 | CRL681_003158                | MPL16_002403               | TL2766_000509                | WCFS1_002807 |
| OG0000843 | CRL1506_001480 | CRL681_003156                | MPL16_002405               | TL2766_000507                | WCFS1_002809 |
| OG0000078 | CRL1506_001479 | CRL681_003155                | MPL16_000821, MPL16_002406 | TL2766_000506, TL2766_002022 | WCFS1_002810 |
| OG0000842 | CRL1506_001478 | CRL681_003154                | MPL16_002407               | TL2766_000505                | WCFS1_002811 |
| OG0000841 | CRL1506_001477 | CRL681_003153                | MPL16_002408               | TL2766_000504                | WCFS1_002812 |
| OG0002390 | CRL1506_001476 | CRL681_003152                |                            | TL2766_000503                | WCFS1_002813 |
| OG0002389 | CRL1506_001475 | CRL681_003151                |                            | TL2766_000502                | WCFS1_002814 |
| OG0000840 | CRL1506_001474 | CRL681_003150                | MPL16_002409               | TL2766_000501                | WCFS1_002815 |
| OG0000839 | CRL1506_001473 | CRL681_003149                | MPL16_002410               | TL2766_000500                | WCFS1_002816 |
| OG0000153 | CRL1506_001472 | CRL681_000011, CRL681_003148 | MPL16_002411               | TL2766_000499                | WCFS1_002817 |
| OG0000838 | CRL1506_001471 | CRL681_003147                | MPL16_002412               | TL2766_000498                | WCFS1_002818 |
| OG0002388 | CRL1506_001470 | CRL681_003146                |                            | TL2766_000497                | WCFS1_002819 |
| OG0000837 | CRL1506_001469 | CRL681_003145                | MPL16_002685               | TL2766_000496                | WCFS1_002820 |
| OG0000836 | CRL1506_001468 | CRL681_003144                | MPL16_002684               | TL2766_000495                | WCFS1_002821 |
| OG0000835 | CRL1506_001467 | CRL681_003143                | MPL16_002683               | TL2766_000494                | WCFS1_002822 |
| OG0000834 | CRL1506_001466 | CRL681_003142                | MPL16_002682               | TL2766_000493                | WCFS1_002823 |
| OG0000833 | CRL1506_001465 | CRL681_003141                | MPL16_002681               | TL2766_000492                | WCFS1_002824 |
| OG0000832 | CRL1506_001464 | CRL681_003140                | MPL16_002680               | TL2766_000491                | WCFS1_002825 |
| OG0000831 | CRL1506_001463 | CRL681_003139                | MPL16_002679               | TL2766_000490                | WCFS1_002826 |
| OG0000830 | CRL1506_001462 | CRL681_003138                | MPL16_002678               | TL2766_000489                | WCFS1_002827 |
| OG0000829 | CRL1506_001461 | CRL681_003137                | MPL16_002677               | TL2766_000488                | WCFS1_002828 |
| OG0000828 | CRL1506_001460 | CRL681_003136                | MPL16_002676               | TL2766_000487                | WCFS1_002829 |
| OG0000152 | CRL1506_001459 | CRL681_003135                | MPL16_000370, MPL16_002675 | TL2766_000486                | WCFS1_002830 |
| OG0000827 | CRL1506_001458 | CRL681_003134                | MPL16_002674               | TL2766_000485                | WCFS1_002831 |
| OG0000826 | CRL1506_001457 | CRL681_003133                | MPL16_002673               | TL2766_000484                | WCFS1_002832 |
| OG0000825 | CRL1506_001456 | CRL681_003132                | MPL16_002672               | TL2766_000483                | WCFS1_002833 |
| OG0000824 | CRL1506_001454 | CRL681_003130                | MPL16_002670               | TL2766_000481                | WCFS1_002835 |
| OG0000823 | CRL1506_001453 | CRL681_003129                | MPL16_002669               | TL2766_000480                | WCFS1_002836 |

|           |                |               |                            |               |              |
|-----------|----------------|---------------|----------------------------|---------------|--------------|
| OG0001023 | CRL1506_001452 | CRL681_003128 | MPL16_002668               | TL2766_000479 | WCFS1_002837 |
| OG0001022 | CRL1506_001451 | CRL681_003127 | MPL16_002667               | TL2766_000478 | WCFS1_002838 |
| OG0003029 |                |               | MPL16_002666               |               | WCFS1_002839 |
| OG0003028 |                |               | MPL16_002665               |               | WCFS1_002840 |
| OG0003027 |                |               | MPL16_002664               |               | WCFS1_002841 |
| OG0003493 |                |               |                            |               | WCFS1_002842 |
| OG0003492 |                |               |                            |               | WCFS1_002844 |
| OG0003026 |                |               | MPL16_002661               |               | WCFS1_002846 |
| OG0003025 |                |               | MPL16_002660               |               | WCFS1_002847 |
| OG0003024 |                |               | MPL16_002659               |               | WCFS1_002848 |
| OG0002848 | CRL1506_002622 |               |                            |               | WCFS1_002850 |
| OG0000822 | CRL1506_001449 | CRL681_003125 | MPL16_001729               | TL2766_000476 | WCFS1_002854 |
| OG0000821 | CRL1506_001448 | CRL681_003124 | MPL16_001728               | TL2766_000475 | WCFS1_002855 |
| OG0003471 |                |               |                            |               | WCFS1_002856 |
| OG0000150 | CRL1506_001447 | CRL681_003123 | MPL16_000387, MPL16_001727 | TL2766_001958 | WCFS1_002857 |
| OG0000820 | CRL1506_001446 | CRL681_003122 | MPL16_001726               | TL2766_001957 | WCFS1_002858 |
| OG0000819 | CRL1506_001445 | CRL681_003121 | MPL16_000356               | TL2766_001956 | WCFS1_002859 |
| OG0000149 | CRL1506_001444 | CRL681_003120 | MPL16_000352, MPL16_000359 | TL2766_001955 | WCFS1_002860 |
| OG0000148 | CRL1506_001443 | CRL681_003119 | MPL16_000353, MPL16_000360 | TL2766_001954 | WCFS1_002861 |
| OG0000818 | CRL1506_001442 | CRL681_003118 | MPL16_000354               | TL2766_001953 | WCFS1_002862 |
| OG0000817 | CRL1506_001441 | CRL681_003117 | MPL16_000355               | TL2766_001952 | WCFS1_002863 |
| OG0002417 | CRL1506_001439 | CRL681_003115 |                            | TL2766_001950 | WCFS1_002865 |
| OG0002386 | CRL1506_001438 | CRL681_003114 |                            | TL2766_001949 | WCFS1_002866 |
| OG0002385 | CRL1506_001437 | CRL681_003113 |                            | TL2766_001948 | WCFS1_002867 |
| OG0002384 | CRL1506_001436 | CRL681_003112 |                            | TL2766_001947 | WCFS1_002868 |
| OG0001021 | CRL1506_001435 | CRL681_003111 | MPL16_003161               | TL2766_001946 | WCFS1_002869 |
| OG0001743 | CRL1506_002642 | CRL681_003110 | MPL16_002268               | TL2766_001945 | WCFS1_002870 |
| OG0001604 | CRL1506_002641 | CRL681_003109 | MPL16_002267               | TL2766_001944 | WCFS1_002871 |
| OG0001603 | CRL1506_002640 | CRL681_003108 | MPL16_001226               | TL2766_001943 | WCFS1_002872 |
| OG0001602 | CRL1506_002639 | CRL681_003107 | MPL16_001227               | TL2766_001942 | WCFS1_002873 |
| OG0001601 | CRL1506_002638 | CRL681_003106 | MPL16_000445               | TL2766_001941 | WCFS1_002874 |



|           |                |                              |              |               |              |
|-----------|----------------|------------------------------|--------------|---------------|--------------|
| OG0001742 | CRL1506_002637 | CRL681_003105                | MPL16_000444 | TL2766_001940 | WCFS1_002875 |
| OG0001600 | CRL1506_002636 | CRL681_003104                | MPL16_000443 | TL2766_001939 | WCFS1_002876 |
| OG0001599 | CRL1506_002635 | CRL681_003103                | MPL16_000442 | TL2766_001938 | WCFS1_002877 |
| OG0001741 | CRL1506_002634 | CRL681_003102                | MPL16_000441 | TL2766_001937 | WCFS1_002878 |
| OG0001598 | CRL1506_002633 | CRL681_003101                | MPL16_000440 | TL2766_001936 | WCFS1_002879 |
| OG0001597 | CRL1506_002632 | CRL681_003100                | MPL16_000439 | TL2766_001935 | WCFS1_002880 |
| OG0001596 | CRL1506_002631 | CRL681_003099                | MPL16_000438 | TL2766_001934 | WCFS1_002881 |
| OG0001595 | CRL1506_002619 | CRL681_003093                | MPL16_000436 | TL2766_001928 | WCFS1_002883 |
| OG0001594 | CRL1506_002618 | CRL681_003091                | MPL16_000435 | TL2766_001927 | WCFS1_002884 |
| OG0001593 | CRL1506_002616 | CRL681_003089                | MPL16_000433 | TL2766_001925 | WCFS1_002886 |
| OG0001592 | CRL1506_002615 | CRL681_003088                | MPL16_000432 | TL2766_001924 | WCFS1_002887 |
| OG0001591 | CRL1506_002614 | CRL681_003087                | MPL16_002185 | TL2766_001923 | WCFS1_002888 |
| OG0001590 | CRL1506_002613 | CRL681_003086                | MPL16_001144 | TL2766_001922 | WCFS1_002889 |
| OG0001589 | CRL1506_002612 | CRL681_003085                | MPL16_001143 | TL2766_001921 | WCFS1_002890 |
| OG0000200 | CRL1506_002611 | CRL681_000579, CRL681_003084 | MPL16_001142 | TL2766_001920 | WCFS1_002891 |
| OG0001588 | CRL1506_002610 | CRL681_003083                | MPL16_001140 | TL2766_001919 | WCFS1_002892 |
| OG0001587 | CRL1506_002609 | CRL681_003082                | MPL16_001139 | TL2766_001918 | WCFS1_002893 |
| OG0001586 | CRL1506_002608 | CRL681_003081                | MPL16_001138 | TL2766_001917 | WCFS1_002894 |
| OG0001585 | CRL1506_002607 | CRL681_003080                | MPL16_001137 | TL2766_001916 | WCFS1_002895 |
| OG0001584 | CRL1506_002606 | CRL681_003079                | MPL16_001136 | TL2766_001915 | WCFS1_002896 |
| OG0001740 | CRL1506_002605 | CRL681_003078                | MPL16_001135 | TL2766_001914 | WCFS1_002897 |
| OG0001583 | CRL1506_002604 | CRL681_003077                | MPL16_001134 | TL2766_001913 | WCFS1_002898 |
| OG0001582 | CRL1506_002603 | CRL681_003076                | MPL16_001133 | TL2766_001912 | WCFS1_002899 |
| OG0001581 | CRL1506_002601 | CRL681_003075                | MPL16_001132 | TL2766_001911 | WCFS1_002900 |
| OG0001580 | CRL1506_002600 | CRL681_003074                | MPL16_001131 | TL2766_001910 | WCFS1_002901 |
| OG0001579 | CRL1506_002599 | CRL681_003073                | MPL16_001130 | TL2766_001909 | WCFS1_002902 |
| OG0001578 | CRL1506_002598 | CRL681_003072                | MPL16_001129 | TL2766_001908 | WCFS1_002903 |
| OG0001577 | CRL1506_002597 | CRL681_003071                | MPL16_001128 | TL2766_001907 | WCFS1_002904 |
| OG0001576 | CRL1506_002596 | CRL681_003070                | MPL16_001127 | TL2766_001906 | WCFS1_002905 |
| OG0002524 | CRL1506_002595 | CRL681_003069                |              | TL2766_001905 | WCFS1_002906 |
| OG0001575 | CRL1506_002594 | CRL681_003068                | MPL16_001126 | TL2766_001904 | WCFS1_002907 |
| OG0001574 | CRL1506_002593 | CRL681_003067                | MPL16_002926 | TL2766_001903 | WCFS1_002908 |
| OG0001573 | CRL1506_002592 | CRL681_003066                | MPL16_002925 | TL2766_001902 | WCFS1_002909 |

|           |                |               |                            |               |              |
|-----------|----------------|---------------|----------------------------|---------------|--------------|
| OG0001572 | CRL1506_002591 | CRL681_003065 | MPL16_002924               | TL2766_001901 | WCFS1_002910 |
| OG0001571 | CRL1506_002590 | CRL681_003064 | MPL16_002923               | TL2766_001900 | WCFS1_002911 |
| OG0001570 | CRL1506_002589 | CRL681_003063 | MPL16_002922               | TL2766_001899 | WCFS1_002912 |
| OG0001569 | CRL1506_002588 | CRL681_003062 | MPL16_002921               | TL2766_001898 | WCFS1_002913 |
| OG0002523 | CRL1506_002587 | CRL681_003061 |                            | TL2766_001897 | WCFS1_002914 |
| OG0001568 | CRL1506_002586 | CRL681_003060 | MPL16_002920               | TL2766_001896 | WCFS1_002915 |
| OG0002522 | CRL1506_002585 | CRL681_003059 |                            | TL2766_001895 | WCFS1_002916 |
| OG0001739 | CRL1506_002584 | CRL681_003058 | MPL16_000264               | TL2766_001894 | WCFS1_002917 |
| OG0001567 | CRL1506_002583 | CRL681_003057 | MPL16_000265               | TL2766_001893 | WCFS1_002918 |
| OG0001566 | CRL1506_002582 | CRL681_003056 | MPL16_000266               | TL2766_001892 | WCFS1_002919 |
| OG0001565 | CRL1506_002581 | CRL681_003055 | MPL16_000267               | TL2766_001891 | WCFS1_002920 |
| OG0001564 | CRL1506_002580 | CRL681_003054 | MPL16_000268               | TL2766_001890 | WCFS1_002921 |
| OG0001563 | CRL1506_002579 | CRL681_003053 | MPL16_000269               | TL2766_001889 | WCFS1_002922 |
| OG0001738 | CRL1506_002578 | CRL681_003052 | MPL16_000270               | TL2766_001888 | WCFS1_002923 |
| OG0000199 | CRL1506_002577 | CRL681_003051 | MPL16_000271, MPL16_002916 | TL2766_001887 | WCFS1_002924 |
| OG0001562 | CRL1506_002576 | CRL681_003050 | MPL16_000272               | TL2766_001886 | WCFS1_002925 |
| OG0001561 | CRL1506_002574 | CRL681_003048 | MPL16_000274               | TL2766_001884 | WCFS1_002927 |
| OG0001560 | CRL1506_002573 | CRL681_003047 | MPL16_000275               | TL2766_001883 | WCFS1_002928 |
| OG0001559 | CRL1506_002572 | CRL681_003046 | MPL16_000276               | TL2766_001882 | WCFS1_002929 |
| OG0000198 | CRL1506_002571 | CRL681_003045 | MPL16_000277, MPL16_002919 | TL2766_001881 | WCFS1_002930 |
| OG0001558 | CRL1506_002570 | CRL681_003044 | MPL16_000278               | TL2766_001880 | WCFS1_002931 |
| OG0001557 | CRL1506_002569 | CRL681_003043 | MPL16_000279               | TL2766_001879 | WCFS1_002932 |
| OG0001556 | CRL1506_002568 | CRL681_003042 | MPL16_000280               | TL2766_001878 | WCFS1_002933 |
| OG0001555 | CRL1506_002567 | CRL681_003041 | MPL16_000286               | TL2766_001877 | WCFS1_002934 |
| OG0001554 | CRL1506_002566 | CRL681_003040 | MPL16_000287               | TL2766_001876 | WCFS1_002935 |
| OG0001553 | CRL1506_002565 | CRL681_003039 | MPL16_000288               | TL2766_001875 | WCFS1_002936 |
| OG0001552 | CRL1506_002564 | CRL681_003038 | MPL16_000289               | TL2766_001874 | WCFS1_002937 |
| OG0001551 | CRL1506_002563 | CRL681_003037 | MPL16_000290               | TL2766_001873 | WCFS1_002938 |
| OG0001550 | CRL1506_002562 | CRL681_003036 | MPL16_000292               | TL2766_001872 | WCFS1_002939 |
| OG0001549 | CRL1506_002561 | CRL681_003035 | MPL16_000293               | TL2766_001871 | WCFS1_002940 |
| OG0002521 | CRL1506_002560 | CRL681_003034 |                            | TL2766_001870 | WCFS1_002942 |
| OG0002520 | CRL1506_002559 | CRL681_003033 |                            | TL2766_001869 | WCFS1_002943 |

|           |                |                              |              |                              |                            |
|-----------|----------------|------------------------------|--------------|------------------------------|----------------------------|
| OG0002519 | CRL1506_002558 | CRL681_003032                |              | TL2766_001868                | WCFS1_002944               |
| OG0002518 | CRL1506_002557 | CRL681_003031                |              | TL2766_001867                | WCFS1_002945               |
| OG0002517 | CRL1506_002556 | CRL681_003030                |              | TL2766_001866                | WCFS1_002946               |
| OG0002516 | CRL1506_002555 | CRL681_003029                |              | TL2766_001865                | WCFS1_002947               |
| OG0002515 | CRL1506_002554 | CRL681_003028                |              | TL2766_001864                | WCFS1_002948               |
| OG0002514 | CRL1506_002553 | CRL681_003027                |              | TL2766_001863                | WCFS1_002949               |
| OG0002513 | CRL1506_002552 | CRL681_003026                |              | TL2766_001862                | WCFS1_002950               |
| OG0001548 | CRL1506_002551 | CRL681_003025                | MPL16_000455 | TL2766_001861                | WCFS1_002951               |
| OG0001547 | CRL1506_002550 | CRL681_003024                | MPL16_002650 | TL2766_001860                | WCFS1_002952               |
| OG0000065 | CRL1506_002549 | CRL681_003010, CRL681_003023 | MPL16_002649 | TL2766_001846, TL2766_001859 | WCFS1_002953, WCFS1_002966 |
| OG0002512 | CRL1506_002548 | CRL681_003022                |              | TL2766_001858                | WCFS1_002954               |
| OG0002511 | CRL1506_002545 | CRL681_003019                |              | TL2766_001855                | WCFS1_002957               |
| OG0002768 |                | CRL681_003017                |              | TL2766_001853                | WCFS1_002959               |
| OG0002767 |                | CRL681_003016                |              | TL2766_001852                | WCFS1_002960               |
| OG0000081 | CRL1506_001773 | CRL681_000538, CRL681_003015 | MPL16_003170 | TL2766_001851, TL2766_002088 | WCFS1_002961               |
| OG0000080 | CRL1506_001771 | CRL681_000536, CRL681_003014 | MPL16_003172 | TL2766_001850, TL2766_002086 | WCFS1_002962               |
| OG0002766 |                | CRL681_003013                |              | TL2766_001849                | WCFS1_002963               |
| OG0002765 |                | CRL681_003012                |              | TL2766_001848                | WCFS1_002964               |
| OG0002764 |                | CRL681_003011                |              | TL2766_001847                | WCFS1_002965               |
| OG0002763 |                | CRL681_003009                |              | TL2766_001845                | WCFS1_002967               |
| OG0001546 | CRL1506_002543 | CRL681_003008                | MPL16_002620 | TL2766_001844                | WCFS1_002968               |
| OG0001545 | CRL1506_002541 | CRL681_003006                | MPL16_002622 | TL2766_001842                | WCFS1_002970               |
| OG0001544 | CRL1506_002540 | CRL681_003005                | MPL16_002623 | TL2766_001841                | WCFS1_002971               |
| OG0001543 | CRL1506_002539 | CRL681_003004                | MPL16_003162 | TL2766_001840                | WCFS1_002972               |
| OG0001542 | CRL1506_002538 | CRL681_003003                | MPL16_003163 | TL2766_001839                | WCFS1_002973               |
| OG0000093 | CRL1506_002537 | CRL681_002930, CRL681_003002 | MPL16_003164 | TL2766_001838                | WCFS1_002974, WCFS1_003057 |
| OG0001541 | CRL1506_002536 | CRL681_003001                | MPL16_003165 | TL2766_001837                | WCFS1_002975               |
| OG0002713 | CRL1506_002535 |                              |              | TL2766_001836                | WCFS1_002976               |
| OG0002510 | CRL1506_002534 | CRL681_003000                |              | TL2766_001835                | WCFS1_002977               |
| OG0001540 | CRL1506_002533 | CRL681_002999                | MPL16_003166 | TL2766_001834                | WCFS1_002978               |

|           |                                |                              |                            |                              |                                          |
|-----------|--------------------------------|------------------------------|----------------------------|------------------------------|------------------------------------------|
| OG0000196 | CRL1506_002531                 | CRL681_002997                | MPL16_003168, MPL16_003176 | TL2766_001832                | WCFS1_002980                             |
| OG0000194 | CRL1506_002527                 | CRL681_002993                | MPL16_003180               | TL2766_001486, TL2766_001828 | WCFS1_002984                             |
| OG0001539 | CRL1506_002526                 | CRL681_002992                | MPL16_003181               | TL2766_001827                | WCFS1_002985                             |
| OG0001737 | CRL1506_002525                 | CRL681_002991                | MPL16_003182               | TL2766_001826                | WCFS1_002986                             |
| OG0001538 | CRL1506_002524                 | CRL681_002990                | MPL16_003183               | TL2766_001825                | WCFS1_002987                             |
| OG0001537 | CRL1506_002523                 | CRL681_002989                | MPL16_003184               | TL2766_001824                | WCFS1_002988                             |
| OG0001536 | CRL1506_002522                 | CRL681_002988                | MPL16_003185               | TL2766_001823                | WCFS1_002989                             |
| OG0001535 | CRL1506_002521                 | CRL681_002987                | MPL16_003186               | TL2766_001822                | WCFS1_002990                             |
| OG0000037 | CRL1506_002486, CRL1506_002511 | CRL681_002961, CRL681_002985 | MPL16_003188               | TL2766_001796, TL2766_001820 | WCFS1_002992, WCFS1_003000, WCFS1_003026 |
| OG0000193 | CRL1506_002518                 | CRL681_002984                | MPL16_001433, MPL16_003189 | TL2766_001819                | WCFS1_002993                             |
| OG0001534 | CRL1506_002517                 | CRL681_002983                | MPL16_003190               | TL2766_001818                | WCFS1_002994                             |
| OG0001533 | CRL1506_002516                 | CRL681_002982                | MPL16_003191               | TL2766_001817                | WCFS1_002995                             |
| OG0001532 | CRL1506_002515                 | CRL681_002981                | MPL16_003192               | TL2766_001816                | WCFS1_002996                             |
| OG0002509 | CRL1506_002514                 | CRL681_002980                | MPL16_003193               |                              | WCFS1_002997                             |
| OG0001531 | CRL1506_002513                 | CRL681_002979                | MPL16_003194               | TL2766_001814                | WCFS1_002998                             |
| OG0002847 | CRL1506_002512                 |                              |                            |                              | WCFS1_002999                             |
| OG0002846 | CRL1506_002510                 |                              |                            |                              | WCFS1_003001                             |
| OG0002845 | CRL1506_002509                 |                              |                            |                              | WCFS1_003002                             |
| OG0002844 | CRL1506_002508                 |                              |                            |                              | WCFS1_003003                             |
| OG0002843 | CRL1506_002507                 |                              |                            |                              | WCFS1_003004                             |
| OG0002842 | CRL1506_002506                 |                              |                            |                              | WCFS1_003005                             |
| OG0002841 | CRL1506_002505                 |                              |                            |                              | WCFS1_003006                             |
| OG0002840 | CRL1506_002504                 |                              |                            |                              | WCFS1_003007                             |
| OG0000060 | CRL1506_001875                 | CRL681_000557, CRL681_003212 | MPL16_000357, MPL16_000419 | TL2766_000285, TL2766_000444 | WCFS1_003008                             |
| OG0002508 | CRL1506_002503                 | CRL681_002978                |                            | TL2766_001813                | WCFS1_003009                             |
| OG0001530 | CRL1506_002502                 | CRL681_002977                | MPL16_003103               | TL2766_001812                | WCFS1_003010                             |
| OG0001529 | CRL1506_002501                 | CRL681_002976                | MPL16_003104               | TL2766_001811                | WCFS1_003011                             |
| OG0001528 | CRL1506_002500                 | CRL681_002975                | MPL16_003105               | TL2766_001810                | WCFS1_003012                             |

|           |                |                              |                            |               |                            |
|-----------|----------------|------------------------------|----------------------------|---------------|----------------------------|
| OG0001527 | CRL1506_002499 | CRL681_002974                | MPL16_003106               | TL2766_001809 | WCFS1_003013               |
| OG0000208 | CRL1506_002498 | CRL681_002973                | MPL16_000188, MPL16_003107 | TL2766_001808 | WCFS1_003014               |
| OG0001526 | CRL1506_002494 | CRL681_002969                | MPL16_003111               | TL2766_001804 | WCFS1_003018               |
| OG0000192 | CRL1506_002493 | CRL681_002968                | MPL16_000958, MPL16_002612 | TL2766_001803 | WCFS1_003019               |
| OG0001525 | CRL1506_002492 | CRL681_002967                | MPL16_002145               | TL2766_001802 | WCFS1_003020               |
| OG0001524 | CRL1506_002491 | CRL681_002966                | MPL16_002144               | TL2766_001801 | WCFS1_003021               |
| OG0001523 | CRL1506_002490 | CRL681_002965                | MPL16_002143               | TL2766_001800 | WCFS1_003022               |
| OG0000191 | CRL1506_002489 | CRL681_002964                | MPL16_000351, MPL16_002142 | TL2766_001799 | WCFS1_003023               |
| OG0001522 | CRL1506_002488 | CRL681_002963                | MPL16_002141               | TL2766_001798 | WCFS1_003024               |
| OG0001521 | CRL1506_002487 | CRL681_002962                | MPL16_002140               | TL2766_001797 | WCFS1_003025               |
| OG0002507 | CRL1506_002485 | CRL681_002960                |                            | TL2766_001795 | WCFS1_003027               |
| OG0002541 | CRL1506_002484 | CRL681_002959                |                            | TL2766_001794 | WCFS1_003028               |
| OG0002506 | CRL1506_002483 | CRL681_002958                |                            | TL2766_001793 | WCFS1_003029               |
| OG0002505 | CRL1506_002482 | CRL681_002957                |                            | TL2766_001792 | WCFS1_003030               |
| OG0002504 | CRL1506_002481 | CRL681_002956                |                            | TL2766_001791 | WCFS1_003031               |
| OG0002503 | CRL1506_002480 | CRL681_002955                |                            | TL2766_001790 | WCFS1_003032               |
| OG0002502 | CRL1506_002479 | CRL681_002954                |                            | TL2766_001789 | WCFS1_003033               |
| OG0002501 | CRL1506_002478 | CRL681_002953                |                            | TL2766_001788 | WCFS1_003034               |
| OG0002762 |                | CRL681_002952                |                            | TL2766_001787 | WCFS1_003035               |
| OG0002917 |                | CRL681_002951                |                            |               | WCFS1_003036               |
| OG0002916 |                | CRL681_002950                |                            |               | WCFS1_003037               |
| OG0002915 |                | CRL681_002949                |                            |               | WCFS1_003038               |
| OG0000245 |                | CRL681_002943, CRL681_002948 | MPL16_000281, MPL16_002102 |               | WCFS1_003039, WCFS1_003044 |
| OG0002914 |                | CRL681_002947                |                            |               | WCFS1_003040               |
| OG0002913 |                | CRL681_002946                |                            |               | WCFS1_003041               |
| OG0002912 |                | CRL681_002945                |                            |               | WCFS1_003042               |
| OG0002911 |                | CRL681_002944                |                            |               | WCFS1_003043               |
| OG0002910 |                | CRL681_002942                |                            |               | WCFS1_003045               |
| OG0002909 |                | CRL681_002941                |                            |               | WCFS1_003046               |
| OG0002908 |                | CRL681_002940                |                            |               | WCFS1_003047               |

|           |                                |                              |                                          |                              |                            |
|-----------|--------------------------------|------------------------------|------------------------------------------|------------------------------|----------------------------|
| OG0002922 |                                | CRL681_002939                |                                          |                              | WCFS1_003048               |
| OG0002907 |                                | CRL681_002937                |                                          |                              | WCFS1_003050               |
| OG0000055 | CRL1506_002251                 | CRL681_002905, CRL681_002936 | MPL16_000373, MPL16_001474, MPL16_002138 | TL2766_001764                | WCFS1_003051, WCFS1_003081 |
| OG0000063 | CRL1506_002252                 | CRL681_002904, CRL681_002935 | MPL16_000374, MPL16_002137               | TL2766_001763                | WCFS1_003052, WCFS1_003082 |
| OG0002906 |                                | CRL681_002934                |                                          |                              | WCFS1_003053               |
| OG0002905 |                                | CRL681_002933                |                                          |                              | WCFS1_003054               |
| OG0000088 | CRL1506_002255                 | CRL681_002901, CRL681_002932 | MPL16_002134                             | TL2766_001760                | WCFS1_003055, WCFS1_003085 |
| OG0002904 |                                | CRL681_002931                |                                          |                              | WCFS1_003056               |
| OG0002457 | CRL1506_002229                 | CRL681_002927                |                                          | TL2766_001786                | WCFS1_003059               |
| OG0002458 | CRL1506_002230                 | CRL681_002926                |                                          | TL2766_001785                | WCFS1_003060               |
| OG0002459 | CRL1506_002231                 | CRL681_002925                |                                          | TL2766_001784                | WCFS1_003061               |
| OG0002460 | CRL1506_002232                 | CRL681_002924                |                                          | TL2766_001783                | WCFS1_003062               |
| OG0002461 | CRL1506_002233                 | CRL681_002923                |                                          | TL2766_001782                | WCFS1_003063               |
| OG0002462 | CRL1506_002234                 | CRL681_002922                |                                          | TL2766_001781                | WCFS1_003064               |
| OG0000082 | CRL1506_001775, CRL1506_002236 | CRL681_000540, CRL681_002920 |                                          | TL2766_001779, TL2766_002090 | WCFS1_003066               |
| OG0002463 | CRL1506_002237                 | CRL681_002919                |                                          | TL2766_001778                | WCFS1_003067               |
| OG0001367 | CRL1506_002238                 | CRL681_002918                | MPL16_002618                             | TL2766_001777                | WCFS1_003068               |
| OG0002464 | CRL1506_002239                 | CRL681_002917                |                                          | TL2766_001776                | WCFS1_003069               |
| OG0002465 | CRL1506_002240                 | CRL681_002916                |                                          | TL2766_001775                | WCFS1_003070               |
| OG0002466 | CRL1506_002241                 | CRL681_002915                |                                          | TL2766_001774                | WCFS1_003071               |
| OG0002467 | CRL1506_002242                 | CRL681_002914                |                                          | TL2766_001773                | WCFS1_003072               |
| OG0002468 | CRL1506_002243                 | CRL681_002913                |                                          | TL2766_001772                | WCFS1_003073               |
| OG0002469 | CRL1506_002244                 | CRL681_002912                |                                          | TL2766_001771                | WCFS1_003074               |
| OG0000087 | CRL1506_002245                 | CRL681_002227, CRL681_002911 | MPL16_000285, MPL16_002617               | TL2766_001770                | WCFS1_003075               |
| OG0002470 | CRL1506_002246                 | CRL681_002910                |                                          | TL2766_001769                | WCFS1_003076               |
| OG0002471 | CRL1506_002247                 | CRL681_002909                |                                          | TL2766_001768                | WCFS1_003077               |
| OG0002472 | CRL1506_002248                 | CRL681_002908                |                                          | TL2766_001767                | WCFS1_003078               |
| OG0002473 | CRL1506_002249                 | CRL681_002907                |                                          | TL2766_001766                | WCFS1_003079               |

|           |                |               |                            |               |              |
|-----------|----------------|---------------|----------------------------|---------------|--------------|
| OG0000177 | CRL1506_002250 | CRL681_002906 | MPL16_001475, MPL16_002139 | TL2766_001765 | WCFS1_003080 |
| OG0000178 | CRL1506_002253 | CRL681_002903 | MPL16_000375, MPL16_002136 | TL2766_001762 | WCFS1_003083 |
| OG0000179 | CRL1506_002254 | CRL681_002902 | MPL16_000376, MPL16_002135 | TL2766_001761 | WCFS1_003084 |
| OG0001368 | CRL1506_002256 | CRL681_002900 | MPL16_002133               | TL2766_001759 | WCFS1_003086 |
| OG0001369 | CRL1506_002257 | CRL681_002899 | MPL16_000244               | TL2766_001758 | WCFS1_003087 |
| OG0001370 | CRL1506_002258 | CRL681_002898 | MPL16_000243               | TL2766_001757 | WCFS1_003088 |
| OG0001371 | CRL1506_002259 | CRL681_002897 | MPL16_003199               | TL2766_001756 | WCFS1_003089 |
| OG0001372 | CRL1506_002260 | CRL681_002896 | MPL16_003200               | TL2766_000447 | WCFS1_003090 |
| OG0001373 | CRL1506_002261 | CRL681_002895 | MPL16_003201               | TL2766_001262 | WCFS1_003091 |
| OG0001374 | CRL1506_002262 | CRL681_002894 | MPL16_003202               | TL2766_001261 | WCFS1_003092 |
| OG0001375 | CRL1506_002263 | CRL681_002893 | MPL16_003203               | TL2766_001260 | WCFS1_003093 |
| OG0001376 | CRL1506_002264 | CRL681_002892 | MPL16_003204               | TL2766_001573 | WCFS1_003094 |
| OG0001377 | CRL1506_002265 | CRL681_002891 | MPL16_003205               | TL2766_001572 | WCFS1_003095 |
| OG0002474 | CRL1506_002266 | CRL681_002890 | MPL16_003206               |               | WCFS1_003096 |
| OG0000180 | CRL1506_002267 | CRL681_002889 | MPL16_000403, MPL16_002083 | TL2766_000217 | WCFS1_003097 |
| OG0000181 | CRL1506_002268 | CRL681_002888 | MPL16_000402, MPL16_002084 | TL2766_000216 | WCFS1_003098 |
| OG0001378 | CRL1506_002269 | CRL681_002887 | MPL16_002085               | TL2766_000215 | WCFS1_003099 |
| OG0001379 | CRL1506_002270 | CRL681_002886 | MPL16_002086               | TL2766_000214 | WCFS1_003100 |
| OG0002475 | CRL1506_002271 | CRL681_002885 | MPL16_002087               |               | WCFS1_003101 |
| OG0001728 | CRL1506_002272 | CRL681_002884 | MPL16_002088               | TL2766_000213 | WCFS1_003102 |
| OG0001380 | CRL1506_002273 | CRL681_002883 | MPL16_002089               | TL2766_000212 | WCFS1_003103 |
| OG0001381 | CRL1506_002274 | CRL681_002882 | MPL16_002090               | TL2766_000211 | WCFS1_003104 |
| OG0001382 | CRL1506_002275 | CRL681_002881 | MPL16_002091               | TL2766_000210 | WCFS1_003105 |
| OG0001383 | CRL1506_002276 | CRL681_002880 | MPL16_002092               | TL2766_000209 | WCFS1_003106 |
| OG0002476 | CRL1506_002277 | CRL681_002879 |                            | TL2766_000208 | WCFS1_003107 |
| OG0002761 |                | CRL681_002878 |                            | TL2766_000207 | WCFS1_003108 |
| OG0001384 | CRL1506_002279 | CRL681_002877 | MPL16_000503               | TL2766_000206 | WCFS1_003109 |
| OG0001385 | CRL1506_002280 | CRL681_002876 | MPL16_000502               | TL2766_000205 | WCFS1_003110 |
| OG0001386 | CRL1506_002281 | CRL681_002875 | MPL16_000501               | TL2766_000204 | WCFS1_003111 |

|           |                                             |                                          |                              |                            |
|-----------|---------------------------------------------|------------------------------------------|------------------------------|----------------------------|
| OG0002344 | CRL681_000800, CRL681_000804                | MPL16_000249, MPL16_000405               |                              | WCFS1_003112               |
| OG0003494 |                                             |                                          |                              | WCFS1_003113               |
| OG0003495 |                                             |                                          |                              | WCFS1_003114               |
| OG0003496 |                                             |                                          |                              | WCFS1_003115               |
| OG0002612 | CRL681_002236, CRL681_003210                | MPL16_000395                             |                              | WCFS1_003116               |
| OG0000110 | CRL681_000010                               | MPL16_000394, MPL16_000822, MPL16_001481 | TL2766_002023, TL2766_003135 | WCFS1_003117               |
| OG0000070 | CRL681_000217, CRL681_000556, CRL681_002240 | MPL16_000422, MPL16_000828, MPL16_003217 | TL2766_000224                | WCFS1_003118               |
| OG0003511 |                                             |                                          |                              | WCFS1_003119               |
| OG0000112 | CRL681_000459, CRL681_000796                | MPL16_002114                             | TL2766_000235, TL2766_001741 | WCFS1_003120, WCFS1_003153 |
| OG0003060 |                                             |                                          |                              | WCFS1_003122, WCFS1_003126 |
| OG0003512 |                                             |                                          |                              | WCFS1_003123               |
| OG0003513 |                                             |                                          |                              | WCFS1_003124               |
| OG0003514 |                                             |                                          |                              | WCFS1_003125               |
| OG0003515 |                                             |                                          |                              | WCFS1_003128               |



|           |                |               |                                                                                                                                                                                                                                                                                                                                                                                                                                                                                                                                                                                            |                              |              |
|-----------|----------------|---------------|--------------------------------------------------------------------------------------------------------------------------------------------------------------------------------------------------------------------------------------------------------------------------------------------------------------------------------------------------------------------------------------------------------------------------------------------------------------------------------------------------------------------------------------------------------------------------------------------|------------------------------|--------------|
| OG0000000 | CRL1506_000713 | CRL681_000164 | MPL16_000103, MPL16_000248,<br>MPL16_000295, MPL16_000959,<br>MPL16_001112, MPL16_001123,<br>MPL16_001229, MPL16_001236,<br>MPL16_001237, MPL16_001300,<br>MPL16_001662, MPL16_001679,<br>MPL16_001702, MPL16_001721,<br>MPL16_001725, MPL16_001730,<br>MPL16_001757, MPL16_002057,<br>MPL16_002146, MPL16_002235,<br>MPL16_002261, MPL16_002266,<br>MPL16_002269, MPL16_002506,<br>MPL16_002528, MPL16_002543,<br>MPL16_002613, MPL16_002638,<br>MPL16_002653, MPL16_003083,<br>MPL16_003085, MPL16_003102,<br>MPL16_003114, MPL16_003118,<br>MPL16_003124, MPL16_003145,<br>MPL16_003219 | TL2766_001740                | WCFS1_003130 |
|           |                |               |                                                                                                                                                                                                                                                                                                                                                                                                                                                                                                                                                                                            |                              |              |
| OG0000247 |                |               | MPL16_000258, MPL16_000406,<br>MPL16_002082                                                                                                                                                                                                                                                                                                                                                                                                                                                                                                                                                | TL2766_002448, TL2766_003124 | WCFS1_003131 |
| OG0002671 |                |               | MPL16_000401                                                                                                                                                                                                                                                                                                                                                                                                                                                                                                                                                                               | TL2766_002447, TL2766_003123 | WCFS1_003132 |
| OG0002342 |                | CRL681_000574 | MPL16_000344, MPL16_000400                                                                                                                                                                                                                                                                                                                                                                                                                                                                                                                                                                 | TL2766_002446                | WCFS1_003133 |

|           |                |                                             |                                                        |                              |              |
|-----------|----------------|---------------------------------------------|--------------------------------------------------------|------------------------------|--------------|
| OG0003040 |                |                                             | MPL16_000371                                           |                              | WCFS1_003134 |
| OG0003041 |                |                                             | MPL16_000372                                           |                              | WCFS1_003135 |
| OG0003497 |                |                                             |                                                        |                              | WCFS1_003136 |
| OG0003498 |                |                                             |                                                        |                              | WCFS1_003137 |
| OG0003499 |                |                                             |                                                        |                              | WCFS1_003138 |
| OG0003500 |                |                                             |                                                        |                              | WCFS1_003139 |
| OG0003501 |                |                                             |                                                        |                              | WCFS1_003140 |
| OG0003502 |                |                                             |                                                        |                              | WCFS1_003141 |
| OG0003503 |                |                                             |                                                        |                              | WCFS1_003142 |
| OG0003504 |                |                                             |                                                        |                              | WCFS1_003143 |
| OG0003505 |                |                                             |                                                        |                              | WCFS1_003144 |
| OG0003506 |                |                                             |                                                        |                              | WCFS1_003145 |
| OG0003507 |                |                                             |                                                        |                              | WCFS1_003146 |
| OG0003508 |                |                                             |                                                        |                              | WCFS1_003147 |
| OG0003509 |                |                                             |                                                        |                              | WCFS1_003148 |
| OG0000045 |                | CRL681_000573, CRL681_003182, CRL681_003206 | MPL16_000399, MPL16_000827, MPL16_002094, MPL16_003210 | TL2766_002027, TL2766_003121 | WCFS1_003149 |
| OG0002341 |                | CRL681_003207                               | MPL16_000398                                           | TL2766_002026, TL2766_003120 | WCFS1_003150 |
| OG0000071 |                | CRL681_000571, CRL681_003181, CRL681_003208 | MPL16_000397, MPL16_000825, MPL16_003211               | TL2766_002025                | WCFS1_003151 |
| OG0002618 |                | CRL681_000570, CRL681_003209                | MPL16_001483                                           |                              | WCFS1_003152 |
| OG0003510 |                |                                             |                                                        |                              | WCFS1_003154 |
| OG0002433 | CRL1506_001865 | CRL681_000234                               | MPL16_002904                                           | TL2766_000035                |              |
| OG0003032 |                |                                             | MPL16_002887                                           | TL2766_000050                |              |
| OG0003389 |                |                                             |                                                        | TL2766_000057                |              |
| OG0002945 |                | CRL681_000210                               |                                                        | TL2766_000062                |              |
| OG0003390 |                |                                             |                                                        | TL2766_000063                |              |
| OG0003391 |                |                                             |                                                        | TL2766_000076                |              |
| OG0002942 |                | CRL681_000183                               |                                                        | TL2766_000087                |              |

|           |                |                              |              |               |
|-----------|----------------|------------------------------|--------------|---------------|
| OG0002778 |                | CRL681_000180                | MPL16_002849 | TL2766_000090 |
| OG0002941 |                | CRL681_000179                |              | TL2766_000091 |
| OG0002940 |                | CRL681_000178                |              | TL2766_000092 |
| OG0002939 |                | CRL681_000177                |              | TL2766_000093 |
| OG0002938 |                | CRL681_000176                |              | TL2766_000094 |
| OG0002937 |                | CRL681_000175                |              | TL2766_000095 |
| OG0002936 |                | CRL681_000174                |              | TL2766_000096 |
| OG0002935 |                | CRL681_000173                |              | TL2766_000097 |
| OG0002934 |                | CRL681_000172                |              | TL2766_000098 |
| OG0002933 |                | CRL681_000171                |              | TL2766_000099 |
| OG0002932 |                | CRL681_000170                |              | TL2766_000100 |
| OG0002931 |                | CRL681_000169                |              | TL2766_000101 |
| OG0002930 |                | CRL681_000168                |              | TL2766_000102 |
| OG0002929 |                | CRL681_000167                |              | TL2766_000103 |
| OG0002949 |                | CRL681_000166                |              | TL2766_000104 |
| OG0003392 |                |                              |              | TL2766_000105 |
| OG0002948 |                | CRL681_000163                |              | TL2766_000106 |
| OG0002928 |                | CRL681_000162                |              | TL2766_000107 |
| OG0002947 |                | CRL681_000161                |              | TL2766_000108 |
| OG0002927 |                | CRL681_000160                |              | TL2766_000109 |
| OG0002777 |                | CRL681_000159, CRL681_000700 |              | TL2766_000110 |
| OG0002776 |                | CRL681_000158, CRL681_000701 |              | TL2766_000111 |
| OG0003030 |                |                              | MPL16_002824 | TL2766_000115 |
| OG0003393 |                |                              |              | TL2766_000142 |
| OG0002489 | CRL1506_002337 | CRL681_002815                | MPL16_000926 | TL2766_000148 |
| OG0003394 |                |                              |              | TL2766_000166 |
| OG0003395 |                |                              |              | TL2766_000167 |
| OG0003400 |                |                              |              | TL2766_000218 |
| OG0003401 |                |                              |              | TL2766_000219 |
| OG0002750 |                | CRL681_002239                | MPL16_003216 | TL2766_000223 |
| OG0003039 |                |                              | MPL16_003218 | TL2766_000225 |
| OG0002751 |                | CRL681_002243                | MPL16_003084 | TL2766_000226 |

|           |                                |                              |                            |                                                                                          |
|-----------|--------------------------------|------------------------------|----------------------------|------------------------------------------------------------------------------------------|
| OG0002752 |                                | CRL681_002244                | MPL16_000414               | TL2766_000227                                                                            |
| OG0002456 | CRL1506_002228                 | CRL681_002245                | MPL16_000413               | TL2766_000228                                                                            |
| OG0002895 |                                | CRL681_002246                |                            | TL2766_000229                                                                            |
| OG0002806 |                                |                              | MPL16_000410, MPL16_002831 | TL2766_000231                                                                            |
| OG0003054 |                                |                              |                            | TL2766_000232, TL2766_002459                                                             |
| OG0003402 |                                |                              |                            | TL2766_000233                                                                            |
| OG0000014 | CRL1506_000894                 | CRL681_000558, CRL681_000569 | MPL16_000420, MPL16_003146 | TL2766_000234, TL2766_000286, TL2766_000446, TL2766_001575, TL2766_002657, TL2766_003139 |
| OG0002717 | CRL1506_002720                 |                              | MPL16_003011               | TL2766_000251                                                                            |
| OG0003403 |                                |                              |                            | TL2766_000289                                                                            |
| OG0003404 |                                |                              |                            | TL2766_000290                                                                            |
| OG0003405 |                                |                              |                            | TL2766_000291                                                                            |
| OG0000303 | CRL1506_000086, CRL1506_001841 |                              | MPL16_000428, MPL16_001031 | TL2766_000321                                                                            |
| OG0002673 | CRL1506_000085                 |                              | MPL16_001032               | TL2766_000322                                                                            |
| OG0002672 | CRL1506_000084                 |                              | MPL16_001033               | TL2766_000323                                                                            |
| OG0003022 |                                |                              | MPL16_002170               | TL2766_000394                                                                            |
| OG0003406 |                                |                              |                            | TL2766_000406                                                                            |
| OG0003410 |                                |                              |                            | TL2766_000408                                                                            |
| OG0003411 |                                |                              |                            | TL2766_000409                                                                            |
| OG0003023 |                                |                              | MPL16_002616               | TL2766_000410                                                                            |
| OG0003407 |                                |                              |                            | TL2766_000411                                                                            |
| OG0003408 |                                |                              |                            | TL2766_000412                                                                            |
| OG0002742 | CRL1506_000581                 |                              |                            | TL2766_000420, TL2766_000434                                                             |
| OG0003409 |                                |                              |                            | TL2766_000422                                                                            |
| OG0002387 | CRL1506_001455                 | CRL681_003131                | MPL16_002671               | TL2766_000482                                                                            |
| OG0002391 | CRL1506_001481                 | CRL681_003157                | MPL16_002404               | TL2766_000508                                                                            |

|           |                                |               |                                             |                              |
|-----------|--------------------------------|---------------|---------------------------------------------|------------------------------|
| OG0000176 | CRL1506_000655, CRL1506_002226 | CRL681_001860 | MPL16_001432                                | TL2766_000535, TL2766_000712 |
| OG0003037 |                                |               | MPL16_003140                                | TL2766_000536                |
| OG0002837 | CRL1506_002215                 |               |                                             | TL2766_000537                |
| OG0002836 | CRL1506_002214                 |               |                                             | TL2766_000538                |
| OG0002835 | CRL1506_002213                 |               |                                             | TL2766_000539                |
| OG0002834 | CRL1506_002212                 |               |                                             | TL2766_000540                |
| OG0002711 | CRL1506_002211, CRL1506_002217 |               |                                             | TL2766_000541                |
| OG0002339 |                                | CRL681_002250 | MPL16_000324, MPL16_000390,<br>MPL16_002111 | TL2766_000542                |
| OG0002753 |                                | CRL681_002249 |                                             | TL2766_000543, TL2766_002762 |
| OG0003412 |                                |               |                                             | TL2766_000544                |
| OG0003020 |                                |               | MPL16_001997                                | TL2766_000574                |
| OG0003019 |                                |               | MPL16_001995                                | TL2766_000575                |
| OG0003018 |                                |               | MPL16_001994                                | TL2766_000576                |
| OG0003017 |                                |               | MPL16_001993                                | TL2766_000577                |
| OG0002369 | CRL1506_001094                 | CRL681_001815 | MPL16_001392                                | TL2766_000670                |
| OG0002677 | CRL1506_001070                 | CRL681_001841 |                                             | TL2766_000695                |
| OG0002631 |                                | CRL681_000793 | MPL16_001587                                | TL2766_000750, TL2766_001098 |
| OG0002630 |                                | CRL681_000792 | MPL16_001586                                | TL2766_000751, TL2766_001097 |
| OG0002967 |                                | CRL681_000791 |                                             | TL2766_000752                |
| OG0002966 |                                | CRL681_000790 |                                             | TL2766_000753                |
| OG0002791 |                                | CRL681_000789 |                                             | TL2766_000754, TL2766_000776 |
| OG0002790 |                                | CRL681_000788 |                                             | TL2766_000755, TL2766_000775 |
| OG0002965 |                                | CRL681_000787 |                                             | TL2766_000756                |
| OG0002789 |                                | CRL681_000786 | MPL16_003090                                | TL2766_000757                |
| OG0002964 |                                | CRL681_000785 |                                             | TL2766_000758                |

|           |                |               |              |               |
|-----------|----------------|---------------|--------------|---------------|
| OG0002963 |                | CRL681_000784 |              | TL2766_000759 |
| OG0002962 |                | CRL681_000783 |              | TL2766_000760 |
| OG0003413 |                |               |              | TL2766_000774 |
| OG0003414 |                |               |              | TL2766_000777 |
| OG0003034 |                |               | MPL16_003101 | TL2766_000778 |
| OG0002741 | CRL1506_000575 | CRL681_000757 |              | TL2766_000786 |
| OG0002594 | CRL1506_000533 | CRL681_000718 | MPL16_002592 | TL2766_000827 |
| OG0002405 | CRL1506_001569 | CRL681_001341 | MPL16_001516 | TL2766_000894 |
| OG0002818 | CRL1506_001542 |               |              | TL2766_000914 |
| OG0002682 | CRL1506_001540 | CRL681_000564 |              | TL2766_000916 |
| OG0002817 | CRL1506_001539 |               |              | TL2766_000917 |
| OG0002681 | CRL1506_001538 | CRL681_000565 |              | TL2766_000918 |
| OG0002396 | CRL1506_001533 | CRL681_001987 | MPL16_000570 | TL2766_000923 |
| OG0002395 | CRL1506_001532 | CRL681_001988 | MPL16_000571 | TL2766_000924 |
| OG0003415 |                |               |              | TL2766_000996 |
| OG0002926 |                | CRL681_000155 |              | TL2766_001053 |
| OG0002718 | CRL1506_002805 | CRL681_000156 |              | TL2766_001054 |
| OG0002999 |                |               | MPL16_001542 | TL2766_001057 |
| OG0003000 |                |               | MPL16_001543 | TL2766_001058 |
| OG0003416 |                |               |              | TL2766_001059 |
| OG0003001 |                |               | MPL16_001545 | TL2766_001060 |
| OG0003002 |                |               | MPL16_001546 | TL2766_001061 |
| OG0003003 |                |               | MPL16_001548 | TL2766_001063 |
| OG0003004 |                |               | MPL16_001549 | TL2766_001064 |
| OG0003005 |                |               | MPL16_001550 | TL2766_001065 |
| OG0003006 |                |               | MPL16_001551 | TL2766_001066 |
| OG0003007 |                |               | MPL16_001552 | TL2766_001067 |
| OG0003008 |                |               | MPL16_001555 | TL2766_001070 |
| OG0002787 |                | CRL681_000687 | MPL16_001556 | TL2766_001071 |
| OG0003417 |                |               |              | TL2766_001073 |
| OG0003009 |                |               | MPL16_001560 | TL2766_001075 |
| OG0003418 |                |               |              | TL2766_001076 |
| OG0003419 |                |               |              | TL2766_001077 |
| OG0002536 | CRL1506_002830 | CRL681_000182 | MPL16_001563 | TL2766_001079 |

|           |                |               |                                             |               |
|-----------|----------------|---------------|---------------------------------------------|---------------|
| OG0003420 |                |               |                                             | TL2766_001080 |
| OG0002730 | CRL1506_002833 |               | MPL16_001564                                | TL2766_001081 |
| OG0002537 | CRL1506_002835 | CRL681_000671 | MPL16_001570                                | TL2766_001082 |
| OG0002786 |                | CRL681_000670 | MPL16_001572                                | TL2766_001083 |
| OG0003010 |                |               | MPL16_001573                                | TL2766_001084 |
| OG0003421 |                |               |                                             | TL2766_001085 |
| OG0003422 |                |               |                                             | TL2766_001086 |
| OG0003011 |                |               | MPL16_001579                                | TL2766_001087 |
| OG0003423 |                |               |                                             | TL2766_001088 |
| OG0003424 |                |               |                                             | TL2766_001089 |
| OG0002849 | CRL1506_002623 |               |                                             | TL2766_001090 |
| OG0003425 |                |               |                                             | TL2766_001091 |
| OG0003426 |                |               |                                             | TL2766_001092 |
| OG0003427 |                |               |                                             | TL2766_001093 |
| OG0003428 |                |               |                                             | TL2766_001094 |
| OG0003012 |                |               | MPL16_001584                                | TL2766_001095 |
| OG0003429 |                |               |                                             | TL2766_001096 |
| OG0003430 |                |               |                                             | TL2766_001099 |
| OG0003431 |                |               |                                             | TL2766_001100 |
| OG0003432 |                |               |                                             | TL2766_001104 |
| OG0003433 |                |               |                                             | TL2766_001105 |
| OG0002816 | CRL1506_001344 |               |                                             | TL2766_001194 |
| OG0002815 | CRL1506_001343 |               |                                             | TL2766_001195 |
| OG0002679 | CRL1506_001342 |               | MPL16_000322                                | TL2766_001196 |
| OG0000744 | CRL1506_001341 |               | MPL16_000323, MPL16_001671,<br>MPL16_002080 | TL2766_001197 |
| OG0002375 | CRL1506_001260 | CRL681_001644 | MPL16_002369                                | TL2766_001337 |
| OG0002376 | CRL1506_001261 | CRL681_001643 | MPL16_002368                                | TL2766_001338 |
| OG0003046 |                |               | MPL16_000536                                | TL2766_001473 |
| OG0002716 | CRL1506_002645 |               | MPL16_000537                                | TL2766_001474 |
| OG0003434 |                |               |                                             | TL2766_001482 |
| OG0003435 |                |               |                                             | TL2766_001484 |
| OG0002525 | CRL1506_002671 | CRL681_001475 | MPL16_000563                                | TL2766_001506 |

|           |                |                              |                            |               |
|-----------|----------------|------------------------------|----------------------------|---------------|
| OG0002676 | CRL1506_000885 | CRL681_001435                |                            | TL2766_001540 |
| OG0002675 | CRL1506_000882 | CRL681_001432                |                            | TL2766_001541 |
| OG0000121 | CRL1506_000883 | CRL681_000002, CRL681_001433 | MPL16_001828, MPL16_002286 | TL2766_001542 |
| OG0002899 |                | CRL681_002579                |                            | TL2766_001598 |
| OG0002900 |                | CRL681_002580                |                            | TL2766_001599 |
| OG0002901 |                | CRL681_002581                |                            | TL2766_001600 |
| OG0002890 | CRL1506_000766 |                              |                            | TL2766_001601 |
| OG0002439 | CRL1506_002142 | CRL681_002604                | MPL16_002118               | TL2766_001623 |
| OG0002440 | CRL1506_002143 | CRL681_002605                | MPL16_002119               | TL2766_001624 |
| OG0002903 |                | CRL681_002719                |                            | TL2766_001733 |
| OG0003436 |                |                              |                            | TL2766_001738 |
| OG0003043 |                |                              | MPL16_000388               | TL2766_001739 |
| OG0002714 | CRL1506_002617 | CRL681_003090                |                            | TL2766_001926 |
| OG0002770 |                | CRL681_000468, CRL681_003094 |                            | TL2766_001929 |
| OG0002918 |                | CRL681_003095                |                            | TL2766_001930 |
| OG0002919 |                | CRL681_003096                |                            | TL2766_001931 |
| OG0002920 |                | CRL681_003097                |                            | TL2766_001932 |
| OG0000816 | CRL1506_001440 | CRL681_000463, CRL681_003116 | MPL16_000262               | TL2766_001951 |
| OG0002735 | CRL1506_000301 | CRL681_000286                |                            | TL2766_002002 |
| OG0003437 |                |                              |                            | TL2766_002024 |
| OG0002432 | CRL1506_001770 | CRL681_000535                | MPL16_003174               | TL2766_002085 |
| OG0002424 | CRL1506_001772 | CRL681_000537                | MPL16_003171               | TL2766_002087 |
| OG0002689 | CRL1506_001774 | CRL681_000539                |                            | TL2766_002089 |
| OG0002690 | CRL1506_001789 | CRL681_001963                |                            | TL2766_002104 |
| OG0002691 | CRL1506_001797 |                              | MPL16_001793               | TL2766_002112 |
| OG0002426 | CRL1506_001815 | CRL681_001938                | MPL16_002199               | TL2766_002130 |
| OG0003438 |                |                              |                            | TL2766_002157 |
| OG0002702 | CRL1506_001848 | CRL681_001900                |                            | TL2766_002162 |
| OG0002428 | CRL1506_001849 | CRL681_001899                | MPL16_000189               | TL2766_002163 |
| OG0002703 | CRL1506_001850 | CRL681_002511                |                            | TL2766_002164 |
| OG0002704 | CRL1506_001851 | CRL681_002510                |                            | TL2766_002165 |



|           |                                |                              |                            |                              |
|-----------|--------------------------------|------------------------------|----------------------------|------------------------------|
| OG0002705 | CRL1506_001853                 | CRL681_002508                |                            | TL2766_002167                |
| OG0003439 |                                |                              |                            | TL2766_002192                |
| OG0003442 |                                |                              |                            | TL2766_002193                |
| OG0002738 | CRL1506_000398                 |                              |                            | TL2766_002219, TL2766_002562 |
| OG0002551 | CRL1506_002879                 | CRL681_002463                | MPL16_002262               | TL2766_002220                |
| OG0003440 |                                |                              |                            | TL2766_002247                |
| OG0002590 | CRL1506_000472                 | CRL681_002392                | MPL16_001839               | TL2766_002259                |
| OG0002155 | CRL1506_000486                 | CRL681_001852, CRL681_002406 | MPL16_001855               | TL2766_002273                |
| OG0003441 |                                |                              |                            | TL2766_002288                |
| OG0003443 |                                |                              |                            | TL2766_002303                |
| OG0002946 |                                | CRL681_000342                |                            | TL2766_002319                |
| OG0002781 |                                | CRL681_000343, CRL681_001907 |                            | TL2766_002320                |
| OG0003444 |                                |                              |                            | TL2766_002443                |
| OG0003021 |                                |                              | MPL16_002081               | TL2766_002449                |
| OG0003445 |                                |                              |                            | TL2766_002450                |
| OG0003446 |                                |                              |                            | TL2766_002453                |
| OG0002894 |                                | CRL681_002257                |                            | TL2766_002454                |
| OG0003447 |                                |                              |                            | TL2766_002455                |
| OG0003448 |                                |                              |                            | TL2766_002457                |
| OG0003449 |                                |                              |                            | TL2766_002532                |
| OG0002573 | CRL1506_000373                 | CRL681_002304                | MPL16_002047               | TL2766_002535                |
| OG0002736 | CRL1506_000388                 |                              | MPL16_001091               | TL2766_002552                |
| OG0002737 | CRL1506_000389                 |                              | MPL16_001087               | TL2766_002553                |
| OG0002881 | CRL1506_000390                 |                              |                            | TL2766_002554                |
| OG0002882 | CRL1506_000391                 |                              |                            | TL2766_002555                |
| OG0002577 | CRL1506_000392, CRL1506_000402 |                              |                            | TL2766_002556, TL2766_002566 |
| OG0002883 | CRL1506_000394                 |                              |                            | TL2766_002558                |
| OG0002884 | CRL1506_000395                 |                              |                            | TL2766_002559                |
| OG0002578 | CRL1506_000396                 |                              | MPL16_001079, MPL16_001090 | TL2766_002560                |

|           |                |               |                            |               |
|-----------|----------------|---------------|----------------------------|---------------|
| OG0002592 | CRL1506_000397 |               | MPL16_001086, MPL16_002018 | TL2766_002561 |
| OG0002579 | CRL1506_000399 |               | MPL16_000463, MPL16_001093 | TL2766_002563 |
| OG0002580 | CRL1506_000412 | CRL681_002331 | MPL16_003220               | TL2766_002577 |
| OG0002755 |                | CRL681_002339 | MPL16_000945               | TL2766_002585 |
| OG0002554 | CRL1506_002896 | CRL681_002446 | MPL16_000472               | TL2766_002618 |
| OG0002708 | CRL1506_002041 |               | MPL16_001105               | TL2766_002631 |
| OG0002833 | CRL1506_002117 |               |                            | TL2766_002736 |
| OG0002832 | CRL1506_002116 |               |                            | TL2766_002737 |
| OG0002862 | CRL1506_002115 |               |                            | TL2766_002738 |
| OG0002831 | CRL1506_002114 |               |                            | TL2766_002739 |
| OG0002830 | CRL1506_002113 |               |                            | TL2766_002740 |
| OG0002829 | CRL1506_002112 |               |                            | TL2766_002741 |
| OG0002997 |                |               | MPL16_001250               | TL2766_002765 |
| OG0002593 | CRL1506_000507 | CRL681_002085 | MPL16_000681               | TL2766_002932 |
| OG0003048 |                |               | MPL16_000776               | TL2766_002953 |
| OG0002809 |                |               | MPL16_000772, MPL16_000777 | TL2766_002954 |
| OG0002531 | CRL1506_002736 | CRL681_001286 | MPL16_003028               | TL2766_003118 |
| OG0003396 |                |               |                            | TL2766_003125 |
| OG0003042 |                |               | MPL16_000380               | TL2766_003126 |
| OG0002784 |                | CRL681_000554 | MPL16_000424               | TL2766_003127 |
| OG0003397 |                |               |                            | TL2766_003129 |
| OG0002989 |                |               | MPL16_001477               | TL2766_003131 |
| OG0002799 |                |               | MPL16_001478, MPL16_002112 | TL2766_003132 |
| OG0002990 |                |               | MPL16_001479               | TL2766_003133 |
| OG0002991 |                |               | MPL16_001480               | TL2766_003134 |
| OG0003398 |                |               |                            | TL2766_003136 |
| OG0003038 |                |               | MPL16_003197               | TL2766_003137 |
| OG0003399 |                |               |                            | TL2766_003138 |

|           |                                             |                                                                                                                                                                                                                                                                                                      |
|-----------|---------------------------------------------|------------------------------------------------------------------------------------------------------------------------------------------------------------------------------------------------------------------------------------------------------------------------------------------------------|
| OG0000003 | CRL681_002251                               | MPL16_000001, MPL16_000235, MPL16_000379, MPL16_000386, MPL16_000451, MPL16_000516, MPL16_000521, MPL16_000937, MPL16_001002, MPL16_001125, MPL16_001155, MPL16_001214, MPL16_001225, MPL16_001700, MPL16_001796, MPL16_001921, MPL16_002122, MPL16_002182, MPL16_002536, MPL16_002651, MPL16_002915 |
| OG0003205 |                                             | MPL16_000045                                                                                                                                                                                                                                                                                         |
| OG0003206 |                                             | MPL16_000046                                                                                                                                                                                                                                                                                         |
| OG0002798 |                                             | MPL16_000061, MPL16_000062, MPL16_000431                                                                                                                                                                                                                                                             |
| OG0003326 |                                             | MPL16_000246                                                                                                                                                                                                                                                                                         |
| OG0000111 | CRL681_000013, CRL681_000474, CRL681_002230 | MPL16_000250, MPL16_000335, MPL16_000341, MPL16_000345                                                                                                                                                                                                                                               |
| OG0002783 | CRL681_000473                               | MPL16_000251, MPL16_000340                                                                                                                                                                                                                                                                           |

|           |                              |                             |
|-----------|------------------------------|-----------------------------|
| OG0002782 | CRL681_000472                | MPL16_000252, MPL16_000339  |
| OG0002954 | CRL681_000470                | MPL16_000254                |
| OG0002953 | CRL681_000469                | MPL16_000255                |
| OG0002891 | CRL681_000001                | MPL16_000257                |
| OG0003327 |                              | MPL16_000260                |
| OG0002988 | CRL681_002231                | MPL16_000261                |
| OG0000010 |                              | MPL16_000263, MPL16_000319, |
|           |                              | MPL16_000378, MPL16_000429, |
|           |                              | MPL16_000484, MPL16_001017, |
|           |                              | MPL16_001349, MPL16_001473, |
|           |                              | MPL16_001633, MPL16_002167, |
|           |                              | MPL16_002242, MPL16_002652, |
|           |                              | MPL16_002927, MPL16_003119  |
| OG0003328 |                              | MPL16_000284                |
| OG0003211 |                              | MPL16_000320                |
| OG0003212 |                              | MPL16_000325                |
| OG0003329 |                              | MPL16_000329                |
| OG0003330 |                              | MPL16_000330                |
| OG0003331 |                              | MPL16_000331                |
| OG0003332 |                              | MPL16_000332                |
| OG0002892 | CRL681_000004                | MPL16_000334                |
| OG0002893 | CRL681_000014                | MPL16_000336                |
| OG0002748 | CRL681_000015, CRL681_000465 | MPL16_000337                |
| OG0003333 |                              | MPL16_000342                |
| OG0003334 |                              | MPL16_000343                |

|           |                                                               |                                                           |
|-----------|---------------------------------------------------------------|-----------------------------------------------------------|
| OG0002987 | CRL681_002229                                                 | MPL16_000346                                              |
| OG0002986 | CRL681_002228                                                 | MPL16_000347                                              |
| OG0003335 |                                                               | MPL16_000348                                              |
| OG0003336 |                                                               | MPL16_000358                                              |
| OG0003213 |                                                               | MPL16_000369                                              |
| OG0003337 |                                                               | MPL16_000381                                              |
| OG0003338 |                                                               | MPL16_000382                                              |
| OG0003339 |                                                               | MPL16_000384                                              |
| OG0003340 |                                                               | MPL16_000385                                              |
| OG0003342 |                                                               | MPL16_000389                                              |
| OG0003341 |                                                               | MPL16_000393                                              |
| OG0003343 |                                                               | MPL16_000404                                              |
| OG0003344 |                                                               | MPL16_000409                                              |
| OG0003345 |                                                               | MPL16_000415                                              |
| OG0003214 |                                                               | MPL16_000416                                              |
| OG0003346 |                                                               | MPL16_000421                                              |
| OG0003347 |                                                               | MPL16_000423                                              |
| OG0002955 | CRL681_000553                                                 | MPL16_000425                                              |
| OG0003044 |                                                               | MPL16_000426, MPL16_001228                                |
| OG0003348 |                                                               | MPL16_000427                                              |
| OG0000244 | CRL681_000794, CRL681_000799,<br>CRL681_000805, CRL681_002248 | MPL16_000446, MPL16_002121                                |
| OG0002668 |                                                               | MPL16_000450, MPL16_000453,<br>MPL16_002611, MPL16_002626 |
| OG0003349 |                                                               | MPL16_000452                                              |
| OG0003350 |                                                               | MPL16_000454                                              |
| OG0003351 |                                                               | MPL16_000462                                              |
| OG0003352 |                                                               | MPL16_000471                                              |
| OG0003353 |                                                               | MPL16_000479                                              |

|           |                |                              |                                                           |
|-----------|----------------|------------------------------|-----------------------------------------------------------|
| OG0003354 |                |                              | MPL16_000504                                              |
| OG0003215 |                |                              | MPL16_000514                                              |
| OG0003216 |                |                              | MPL16_000515                                              |
| OG0002667 |                |                              | MPL16_000522, MPL16_002128,<br>MPL16_002507, MPL16_002914 |
| OG0003355 |                |                              | MPL16_000567                                              |
| OG0003356 |                |                              | MPL16_000574                                              |
| OG0003047 |                |                              | MPL16_000575, MPL16_000576                                |
| OG0003357 |                |                              | MPL16_000578                                              |
| OG0003358 |                |                              | MPL16_000579                                              |
| OG0002707 | CRL1506_001929 | CRL681_001541                | MPL16_000580                                              |
| OG0003359 |                |                              | MPL16_000581                                              |
| OG0003360 |                |                              | MPL16_000586                                              |
| OG0003361 |                |                              | MPL16_000638                                              |
| OG0003362 |                |                              | MPL16_000658                                              |
| OG0003363 |                |                              | MPL16_000659                                              |
| OG0003364 |                |                              | MPL16_000660                                              |
| OG0003365 |                |                              | MPL16_000661                                              |
| OG0003366 |                |                              | MPL16_000662                                              |
| OG0003367 |                |                              | MPL16_000663                                              |
| OG0003368 |                |                              | MPL16_000664                                              |
| OG0003369 |                |                              | MPL16_000665                                              |
| OG0002970 |                | CRL681_001131                | MPL16_000774                                              |
| OG0002794 |                | CRL681_001130, CRL681_001132 | MPL16_000775                                              |
| OG0003370 |                |                              | MPL16_000806                                              |
| OG0002771 |                | CRL681_003176, CRL681_003190 | MPL16_000807                                              |
| OG0003371 |                |                              | MPL16_000808                                              |
| OG0003372 |                |                              | MPL16_000809                                              |
| OG0003373 |                |                              | MPL16_000811                                              |

|           |                |                                                        |
|-----------|----------------|--------------------------------------------------------|
| OG0002800 |                | MPL16_000823, MPL16_001482, MPL16_003213               |
| OG0002956 | CRL681_000572  | MPL16_000826                                           |
| OG0003374 |                | MPL16_000893                                           |
| OG0003375 |                | MPL16_000957                                           |
| OG0003376 |                | MPL16_001078                                           |
| OG0002345 | CRL681_001919  | MPL16_001080, MPL16_001084, MPL16_001085, MPL16_001100 |
| OG0003377 |                | MPL16_001083                                           |
| OG0003378 |                | MPL16_001088                                           |
| OG0003379 |                | MPL16_001098                                           |
| OG0003380 |                | MPL16_001110                                           |
| OG0003381 |                | MPL16_001114                                           |
| OG0003382 |                | MPL16_001116                                           |
| OG0003383 |                | MPL16_001120                                           |
| OG0003384 |                | MPL16_001121                                           |
| OG0003385 |                | MPL16_001141                                           |
| OG0003386 |                | MPL16_001145                                           |
| OG0003217 |                | MPL16_001183                                           |
| OG0003387 |                | MPL16_001219                                           |
| OG0003388 |                | MPL16_001220                                           |
| OG0002805 | CRL1506_001207 | MPL16_001224, MPL16_002077, MPL16_003196               |
| OG0002814 |                | MPL16_001230                                           |
| OG0003218 |                | MPL16_001305                                           |
| OG0003219 |                | MPL16_001449                                           |
| OG0003220 |                | MPL16_001450                                           |
| OG0003221 |                | MPL16_001451                                           |
| OG0003222 |                | MPL16_001455                                           |
| OG0003223 |                | MPL16_001465                                           |

|           |                |                              |                                                           |
|-----------|----------------|------------------------------|-----------------------------------------------------------|
| OG0003224 |                |                              | MPL16_001466                                              |
| OG0003207 |                |                              | MPL16_001476                                              |
| OG0002998 |                |                              | MPL16_001488, MPL16_001489                                |
| OG0003225 |                |                              | MPL16_001539                                              |
| OG0003226 |                |                              | MPL16_001554                                              |
| OG0003235 |                |                              | MPL16_001558                                              |
| OG0003227 |                |                              | MPL16_001562                                              |
| OG0003228 |                |                              | MPL16_001567                                              |
| OG0003229 |                |                              | MPL16_001569                                              |
| OG0002959 |                | CRL681_000668                | MPL16_001574                                              |
| OG0002779 |                | CRL681_000198, CRL681_000665 | MPL16_001577                                              |
| OG0002958 |                | CRL681_000664                | MPL16_001578                                              |
| OG0003230 |                |                              | MPL16_001580                                              |
| OG0002957 |                | CRL681_000662                | MPL16_001581                                              |
| OG0003231 |                |                              | MPL16_001582                                              |
| OG0003232 |                |                              | MPL16_001583                                              |
| OG0003233 |                |                              | MPL16_001585                                              |
| OG0003234 |                |                              | MPL16_001592                                              |
| OG0002567 | CRL1506_000280 | CRL681_002512                | MPL16_001635, MPL16_002535                                |
| OG0003236 |                |                              | MPL16_001652                                              |
| OG0002665 |                |                              | MPL16_001665, MPL16_001666,<br>MPL16_001667, MPL16_001669 |
| OG0003237 |                |                              | MPL16_001670                                              |
| OG0003238 |                |                              | MPL16_001672                                              |
| OG0003239 |                |                              | MPL16_001673                                              |
| OG0003240 |                |                              | MPL16_001675                                              |
| OG0003241 |                |                              | MPL16_001684                                              |
| OG0003242 |                |                              | MPL16_001782                                              |
| OG0003244 |                |                              | MPL16_001810                                              |



|           |                |                              |              |
|-----------|----------------|------------------------------|--------------|
| OG0003243 |                |                              | MPL16_001811 |
| OG0003245 |                |                              | MPL16_001849 |
| OG0003246 |                |                              | MPL16_001873 |
| OG0003247 |                |                              | MPL16_001875 |
| OG0002983 |                | CRL681_001684                | MPL16_001884 |
| OG0002982 |                | CRL681_001683                | MPL16_001885 |
| OG0002981 |                | CRL681_001682                | MPL16_001886 |
| OG0002980 |                | CRL681_001681                | MPL16_001887 |
| OG0002979 |                | CRL681_001680                | MPL16_001888 |
| OG0003248 |                |                              | MPL16_001922 |
| OG0003249 |                |                              | MPL16_001996 |
| OG0003250 |                |                              | MPL16_001998 |
| OG0003251 |                |                              | MPL16_002058 |
| OG0003252 |                |                              | MPL16_002072 |
| OG0003253 |                |                              | MPL16_002078 |
| OG0003254 |                |                              | MPL16_002079 |
| OG0002774 |                | CRL681_000552, CRL681_003204 | MPL16_002093 |
| OG0002859 | CRL1506_001887 |                              | MPL16_002100 |
| OG0003255 |                |                              | MPL16_002101 |
| OG0002887 | CRL1506_000598 |                              | MPL16_002103 |
| OG0003256 |                |                              | MPL16_002107 |
| OG0003257 |                |                              | MPL16_002108 |
| OG0003258 |                |                              | MPL16_002109 |
| OG0003259 |                |                              | MPL16_002110 |
| OG0003260 |                |                              | MPL16_002113 |
| OG0003261 |                |                              | MPL16_002116 |
| OG0003262 |                |                              | MPL16_002117 |
| OG0002709 | CRL1506_002144 | CRL681_002606                | MPL16_002120 |
| OG0003263 |                |                              | MPL16_002183 |
| OG0003264 |                |                              | MPL16_002186 |
| OG0003265 |                |                              | MPL16_002204 |
| OG0003266 |                |                              | MPL16_002236 |
| OG0003267 |                |                              | MPL16_002237 |

|           |                |              |
|-----------|----------------|--------------|
| OG0003268 |                | MPL16_002238 |
| OG0003269 |                | MPL16_002241 |
| OG0003270 |                | MPL16_002284 |
| OG0002863 | CRL1506_002794 | MPL16_002285 |
| OG0003271 |                | MPL16_002385 |
| OG0003272 |                | MPL16_002570 |
| OG0003273 |                | MPL16_002615 |
| OG0003274 |                | MPL16_002624 |
| OG0003275 |                | MPL16_002625 |
| OG0003208 |                | MPL16_002635 |
| OG0003276 |                | MPL16_002641 |
| OG0003277 |                | MPL16_002656 |
| OG0003278 |                | MPL16_002657 |
| OG0003279 |                | MPL16_002690 |
| OG0003308 |                | MPL16_002691 |
| OG0003280 |                | MPL16_002701 |
| OG0003281 |                | MPL16_002830 |
| OG0003282 |                | MPL16_002832 |
| OG0003283 |                | MPL16_002835 |
| OG0003284 |                | MPL16_002837 |
| OG0003285 |                | MPL16_002838 |
| OG0003286 |                | MPL16_002839 |
| OG0003287 |                | MPL16_002840 |
| OG0003288 |                | MPL16_002841 |
| OG0003289 |                | MPL16_002842 |
| OG0003290 |                | MPL16_002843 |
| OG0003291 |                | MPL16_002844 |
| OG0002825 | CRL1506_001886 | MPL16_002845 |
| OG0003292 |                | MPL16_002846 |
| OG0003293 |                | MPL16_002847 |
| OG0003294 |                | MPL16_002848 |
| OG0002865 | CRL1506_002907 | MPL16_002851 |
| OG0003295 |                | MPL16_002852 |
| OG0003296 |                | MPL16_002853 |

|           |                                                   |                            |
|-----------|---------------------------------------------------|----------------------------|
| OG0003297 |                                                   | MPL16_002855               |
| OG0003298 |                                                   | MPL16_002858               |
| OG0003299 |                                                   | MPL16_002860               |
| OG0002944 | CRL681_000189                                     | MPL16_002861               |
| OG0002538 | CRL1506_000711, CRL1506_002836,<br>CRL1506_002921 | MPL16_002865               |
| OG0003300 |                                                   | MPL16_002873               |
| OG0003301 |                                                   | MPL16_002874               |
| OG0003302 |                                                   | MPL16_002875               |
| OG0003303 |                                                   | MPL16_002876               |
| OG0003304 |                                                   | MPL16_002877               |
| OG0003305 |                                                   | MPL16_002878               |
| OG0003306 |                                                   | MPL16_002879               |
| OG0003307 |                                                   | MPL16_002880               |
| OG0003309 |                                                   | MPL16_002918               |
| OG0003310 |                                                   | MPL16_002956               |
| OG0003311 |                                                   | MPL16_003025               |
| OG0003312 |                                                   | MPL16_003067               |
| OG0003313 |                                                   | MPL16_003095               |
| OG0003314 |                                                   | MPL16_003097               |
| OG0003315 |                                                   | MPL16_003099               |
| OG0003316 |                                                   | MPL16_003100               |
| OG0003209 |                                                   | MPL16_003112               |
| OG0003317 |                                                   | MPL16_003127               |
| OG0002613 | CRL681_002261, CRL681_002262                      | MPL16_003147, MPL16_003148 |
| OG0003318 |                                                   | MPL16_003152               |
| OG0003210 |                                                   | MPL16_003173               |
| OG0003319 |                                                   | MPL16_003195               |
| OG0003320 |                                                   | MPL16_003198               |
| OG0003321 |                                                   | MPL16_003207               |
| OG0003322 |                                                   | MPL16_003208               |
| OG0003323 |                                                   | MPL16_003209               |

|           |                                                                                                                                 |              |
|-----------|---------------------------------------------------------------------------------------------------------------------------------|--------------|
| OG0003324 |                                                                                                                                 | MPL16_003225 |
| OG0003325 |                                                                                                                                 | MPL16_003228 |
| OG0003111 | CRL681_000006                                                                                                                   |              |
| OG0002747 | CRL681_000008, CRL681_003191,<br>CRL681_003198                                                                                  |              |
| OG0003112 | CRL681_000009                                                                                                                   |              |
| OG0003134 | CRL681_000191                                                                                                                   |              |
| OG0003135 | CRL681_000192                                                                                                                   |              |
| OG0003136 | CRL681_000197                                                                                                                   |              |
| OG0003137 | CRL681_000199                                                                                                                   |              |
| OG0003138 | CRL681_000205                                                                                                                   |              |
| OG0003139 | CRL681_000208                                                                                                                   |              |
| OG0003140 | CRL681_000209                                                                                                                   |              |
| OG0003141 | CRL681_000218                                                                                                                   |              |
| OG0003142 | CRL681_000219                                                                                                                   |              |
| OG0000072 | CRL681_000456, CRL681_000551,<br>CRL681_000908, CRL681_001225,<br>CRL681_001403, CRL681_001967,<br>CRL681_002208, CRL681_002209 |              |
| OG0002749 | CRL681_000460, CRL681_000706,<br>CRL681_000795                                                                                  |              |
| OG0002772 | CRL681_000461, CRL681_000476,<br>CRL681_003180                                                                                  |              |
| OG0002952 | CRL681_000462, CRL681_000477                                                                                                    |              |
| OG0003143 | CRL681_000464                                                                                                                   |              |
| OG0003144 | CRL681_000467                                                                                                                   |              |

|           |                |               |
|-----------|----------------|---------------|
| OG0003145 |                | CRL681_000485 |
| OG0003146 |                | CRL681_000555 |
| OG0003147 |                | CRL681_000568 |
| OG0003148 |                | CRL681_000577 |
| OG0003149 |                | CRL681_000578 |
| OG0003150 |                | CRL681_000580 |
| OG0003151 |                | CRL681_000635 |
| OG0003152 |                | CRL681_000653 |
| OG0003153 |                | CRL681_000654 |
| OG0003154 |                | CRL681_000655 |
| OG0003155 |                | CRL681_000657 |
| OG0002873 | CRL1506_002936 | CRL681_000658 |
| OG0003156 |                | CRL681_000660 |
| OG0003157 |                | CRL681_000661 |
| OG0003158 |                | CRL681_000663 |
| OG0003159 |                | CRL681_000669 |
| OG0003160 |                | CRL681_000673 |
| OG0003161 |                | CRL681_000675 |
| OG0003162 |                | CRL681_000676 |
| OG0002850 | CRL1506_002628 | CRL681_000677 |
| OG0003163 |                | CRL681_000678 |
| OG0003164 |                | CRL681_000679 |
| OG0003179 |                | CRL681_000680 |
| OG0003165 |                | CRL681_000682 |
| OG0003166 |                | CRL681_000683 |
| OG0003167 |                | CRL681_000684 |
| OG0003168 |                | CRL681_000686 |
| OG0003169 |                | CRL681_000688 |
| OG0003170 |                | CRL681_000689 |
| OG0003171 |                | CRL681_000690 |
| OG0003172 |                | CRL681_000691 |
| OG0003173 |                | CRL681_000692 |
| OG0003174 |                | CRL681_000693 |
| OG0003175 |                | CRL681_000694 |

|           |                |                                                |
|-----------|----------------|------------------------------------------------|
| OG0003176 |                | CRL681_000695                                  |
| OG0002824 | CRL1506_001876 | CRL681_000697                                  |
| OG0003177 |                | CRL681_000702                                  |
| OG0003178 |                | CRL681_000703                                  |
| OG0002823 | CRL1506_001869 | CRL681_000704                                  |
| OG0003180 |                | CRL681_000769                                  |
| OG0003181 |                | CRL681_000770                                  |
| OG0003182 |                | CRL681_000771                                  |
| OG0003183 |                | CRL681_000801                                  |
| OG0003184 |                | CRL681_000802                                  |
| OG0003185 |                | CRL681_000803                                  |
| OG0002811 | CRL1506_000044 | CRL681_000848                                  |
| OG0002793 |                | CRL681_001018, CRL681_001328,<br>CRL681_001968 |
| OG0003186 |                | CRL681_001024                                  |
| OG0003187 |                | CRL681_001214                                  |
| OG0002812 | CRL1506_000881 | CRL681_001431                                  |
| OG0002813 | CRL1506_000884 | CRL681_001434                                  |
| OG0002826 | CRL1506_001930 | CRL681_001542                                  |
| OG0002827 | CRL1506_001931 | CRL681_001543                                  |
| OG0002860 | CRL1506_001932 | CRL681_001544                                  |
| OG0002861 | CRL1506_001933 | CRL681_001545                                  |
| OG0002828 | CRL1506_001934 | CRL681_001546                                  |
| OG0003188 |                | CRL681_001646                                  |
| OG0003189 |                | CRL681_001753                                  |
| OG0003190 |                | CRL681_001840                                  |
| OG0003191 |                | CRL681_001905                                  |
| OG0002984 |                | CRL681_001909, CRL681_001911                   |
| OG0003192 |                | CRL681_001912                                  |
| OG0003193 |                | CRL681_001921                                  |
| OG0003194 |                | CRL681_001922                                  |
| OG0003195 |                | CRL681_001923                                  |

|           |                |                              |
|-----------|----------------|------------------------------|
| OG0003196 |                | CRL681_001924                |
| OG0003197 |                | CRL681_001925                |
| OG0002820 | CRL1506_001816 | CRL681_001937                |
| OG0003202 |                | CRL681_001982                |
| OG0003198 |                | CRL681_002049                |
| OG0003199 |                | CRL681_002050                |
| OG0003200 |                | CRL681_002052                |
| OG0003201 |                | CRL681_002053                |
| OG0002985 |                | CRL681_002225, CRL681_002235 |
| OG0003203 |                | CRL681_002232                |
| OG0002925 |                | CRL681_002233, CRL681_003202 |
| OG0003204 |                | CRL681_002234                |
| OG0003113 |                | CRL681_002241                |
| OG0003114 |                | CRL681_002247                |
| OG0003115 |                | CRL681_002256                |
| OG0002864 | CRL1506_002899 | CRL681_002443                |
| OG0003116 |                | CRL681_002541                |
| OG0002858 | CRL1506_002834 | CRL681_002648                |
| OG0003117 |                | CRL681_002834                |
| OG0003118 |                | CRL681_002835                |
| OG0003119 |                | CRL681_002836                |
| OG0003120 |                | CRL681_002837                |
| OG0003121 |                | CRL681_002838                |
| OG0003122 |                | CRL681_002928                |
| OG0003123 |                | CRL681_003092                |
| OG0003124 |                | CRL681_003177                |
| OG0003125 |                | CRL681_003178                |
| OG0002923 |                | CRL681_003179, CRL681_003197 |
| OG0003126 |                | CRL681_003183                |

|           |                                                |
|-----------|------------------------------------------------|
| OG0002773 | CRL681_003185, CRL681_003193,<br>CRL681_003200 |
| OG0003127 | CRL681_003186                                  |
| OG0003128 | CRL681_003188                                  |
| OG0003129 | CRL681_003189                                  |
| OG0002924 | CRL681_003192, CRL681_003199                   |
| OG0003130 | CRL681_003194                                  |
| OG0003131 | CRL681_003195                                  |
| OG0003132 | CRL681_003201                                  |
| OG0003133 | CRL681_003203                                  |
| OG0003110 | CRL1506_000584                                 |
| OG0003103 | CRL1506_000586                                 |
| OG0002886 | CRL1506_000592, CRL1506_000736                 |
| OG0003104 | CRL1506_000593                                 |
| OG0003105 | CRL1506_000610                                 |
| OG0003106 | CRL1506_000617                                 |
| OG0003107 | CRL1506_000618                                 |
| OG0003108 | CRL1506_000620                                 |
| OG0002870 | CRL1506_000705, CRL1506_002926                 |
| OG0003109 | CRL1506_000707                                 |
| OG0003061 | CRL1506_000839                                 |
| OG0003062 | CRL1506_000895                                 |
| OG0003063 | CRL1506_001206                                 |
| OG0003064 | CRL1506_001229                                 |
| OG0003065 | CRL1506_001230                                 |
| OG0003066 | CRL1506_001432                                 |
| OG0003067 | CRL1506_001433                                 |
| OG0003068 | CRL1506_001842                                 |
| OG0003069 | CRL1506_001867                                 |
| OG0003070 | CRL1506_001870                                 |



|           |                |
|-----------|----------------|
| OG0003071 | CRL1506_001871 |
| OG0003072 | CRL1506_001872 |
| OG0003073 | CRL1506_001874 |
| OG0003074 | CRL1506_001878 |
| OG0003075 | CRL1506_001879 |
| OG0003076 | CRL1506_001880 |
| OG0003077 | CRL1506_001881 |
| OG0003078 | CRL1506_001882 |
| OG0003079 | CRL1506_001883 |
| OG0003080 | CRL1506_001884 |
| OG0003093 | CRL1506_001885 |

|           |                                                                   |
|-----------|-------------------------------------------------------------------|
| OG0002455 | CRL1506_002218, CRL1506_002219,<br>CRL1506_002221, CRL1506_002224 |
|-----------|-------------------------------------------------------------------|

|           |                |
|-----------|----------------|
| OG0003081 | CRL1506_002225 |
| OG0003082 | CRL1506_002602 |
| OG0003083 | CRL1506_002624 |
| OG0003084 | CRL1506_002625 |
| OG0003085 | CRL1506_002627 |
| OG0003086 | CRL1506_002792 |
| OG0003087 | CRL1506_002795 |
| OG0003088 | CRL1506_002796 |
| OG0003089 | CRL1506_002800 |
| OG0003094 | CRL1506_002803 |
| OG0003090 | CRL1506_002828 |
| OG0003091 | CRL1506_002829 |
| OG0003092 | CRL1506_002832 |
| OG0003095 | CRL1506_002903 |
| OG0003096 | CRL1506_002908 |
| OG0003097 | CRL1506_002909 |
| OG0003098 | CRL1506_002914 |
| OG0003099 | CRL1506_002916 |
| OG0003100 | CRL1506_002929 |

|           |                |
|-----------|----------------|
| OG0003101 | CRL1506_002934 |
| OG0003102 | CRL1506_002967 |

Table S2. Genes “probiotic markers” of the core/soft core genome.

| Orthologous group | Gene               | ORF         | Locus Name | Protein                                        | Stress Response / Probiotic Effect       | Organism                                                                                          |
|-------------------|--------------------|-------------|------------|------------------------------------------------|------------------------------------------|---------------------------------------------------------------------------------------------------|
| OG0000075         | <i>pdhD_2/lpdA</i> |             | lp_2151    | Dihydrolipoyl dehydrogenase                    | Bile resistance                          | <i>Lactiplantibacillus plantarum</i>                                                              |
| OG0000085         | <i>gap</i>         |             |            | Glyceraldehyde-3-phosphate dehydrogenase       | Acid stress                              | <i>Lactiplantibacillus plantarum</i> subsp. <i>plantarum</i> ATCC 14917 = JCM 1149 = CGMCC 1.2437 |
| OG0000183         | <i>htrA</i>        |             | lp_0043    | Serine protease HtrA                           | Acid stress/ Bile resistance/Temperature | <i>Lactiplantibacillus plantarum</i> (ATCC BAA-793 / NCIMB 8826 / WCFS1)                          |
| OG0000204         | <i>osmV</i>        | C7M34_02683 |            | Osmoprotectant import ATP-binding protein OsmV | Osmotic stress                           | <i>Lactiplantibacillus plantarum</i>                                                              |
| OG0000222         | <i>copA</i>        |             | lp_3055    | Copper transporting ATPase                     | Acid stress/ Bile resistance             | <i>Lactiplantibacillus plantarum</i> (ATCC BAA-793 / NCIMB 8826 / WCFS1)                          |
| OG0000285         | <i>pyrG</i>        |             | lp_0481    | CTP synthase                                   | Bile resistance                          | <i>Lactiplantibacillus plantarum</i> (ATCC BAA-793 / NCIMB 8826 / WCFS1)                          |
| OG0000308         | <i>arcB</i>        | C7M36_00748 |            | Ornithine carbamoyltransferase                 | Acid stress/ Bile resistance             | <i>Lactiplantibacillus plantarum</i>                                                              |
| OG0000312         | <i>ldh_1/ldh</i>   |             | lp_0537    | L-lactate dehydrogenase 1                      | Acid stress                              | <i>Lactiplantibacillus plantarum</i> (ATCC BAA-793 / NCIMB 8826 / WCFS1)                          |
| OG0000346         | <i>msrB</i>        |             | lp_1836    | Peptide methionine sulfoxide reductase MsrB    | Oxidative stress                         | <i>Lactiplantibacillus plantarum</i> (ATCC BAA-793 / NCIMB 8826 / WCFS1)                          |
| OG0000413         | <i>plsC</i>        |             | lp_2060    | 1-acylglycerol-3-phosphate O-acyltransferase   | Acid stress                              | <i>Lactiplantibacillus plantarum</i> (ATCC BAA-793 / NCIMB 8826 / WCFS1)                          |
| OG0000441         | <i>dnaK</i>        |             | lp_2027    | Chaperone protein DnaK / HSP70                 | Acid stress/ Bile resistance             | <i>Lactiplantibacillus plantarum</i> (ATCC BAA-793 / NCIMB 8826 / WCFS1)                          |
| OG0000442         | <i>dnaJ</i>        |             | lp_2026    | Chaperone protein DnaJ                         | Acid stress/ Bile resistance/Temperature | <i>Lactiplantibacillus plantarum</i> (ATCC BAA-793 / NCIMB 8826 / WCFS1)                          |
| OG0000445         | <i>dltA</i>        |             | lp_2019    | D-alanine--D-alanyl carrier protein ligase     | Acid stress                              | <i>Lactiplantibacillus plantarum</i> (ATCC BAA-793 / NCIMB 8826 / WCFS1)                          |
| OG0000447         | <i>dltD</i>        |             | lp_2016    | Protein DltD                                   | Acid stress                              | <i>Lactiplantibacillus plantarum</i> (ATCC BAA-793 / NCIMB 8826 / WCFS1)                          |
| OG0000455         | <i>relA</i>        |             | lp_1987    | GTP pyrophosphokinase                          | Acid stress                              | <i>Lactiplantibacillus plantarum</i> (ATCC BAA-793 / NCIMB 8826 / WCFS1)                          |
| OG0000504         | <i>pyk</i>         |             | lp_1897    | Pyruvate kinase                                | Acid stress                              | <i>Lactiplantibacillus plantarum</i> (ATCC BAA-793 / NCIMB 8826 / WCFS1)                          |
| OG0000537         | <i>clpB</i>        |             | lp_1903    | Chaperone protein ClpB                         | Acid stress                              | <i>Lactiplantibacillus plantarum</i> (ATCC BAA-793 / NCIMB 8826 / WCFS1)                          |
| OG0000580         | <i>rpsE</i>        |             | lp_1053    | 30S ribosomal protein S5                       | Bile resistance                          | <i>Lactiplantibacillus plantarum</i> (ATCC BAA-793 / NCIMB 8826 / WCFS1)                          |
| OG0000582         | <i>rplF</i>        |             | lp_1051    | 50S ribosomal protein L6                       | Bile resistance                          | <i>Lactiplantibacillus plantarum</i> (ATCC BAA-793 / NCIMB 8826 / WCFS1)                          |
| OG0000585         | <i>rplE</i>        |             | lp_1047    | 50S ribosomal protein L5                       | Bile resistance                          | <i>Lactiplantibacillus plantarum</i> (ATCC BAA-793 / NCIMB 8826 / WCFS1)                          |
| OG0000591         | <i>rpsC</i>        |             | lp_1040    | 30S ribosomal protein S3                       | Bile resistance                          | <i>Lactiplantibacillus plantarum</i> (ATCC BAA-793 / NCIMB 8826 / WCFS1)                          |
| OG0000596         | <i>rplD</i>        |             | lp_1034    | 50S ribosomal protein L4                       | Bile resistance                          | <i>Lactiplantibacillus plantarum</i> (ATCC BAA-793 / NCIMB 8826 / WCFS1)                          |
| OG0000644         | <i>gpmB/pspA_1</i> |             | lp_0945    | Histidine phosphatase family protein           | Acid stress                              | <i>Lactiplantibacillus plantarum</i>                                                              |
| OG0000660         | <i>guaA</i>        |             |            | GMP synthase [glutamine-hydrolyzing]           | Acid stress                              | <i>Lactiplantibacillus plantarum</i>                                                              |

|           |                    |              |                                                                                         |                                                                                |                                                                                |
|-----------|--------------------|--------------|-----------------------------------------------------------------------------------------|--------------------------------------------------------------------------------|--------------------------------------------------------------------------------|
| OG0000714 | <i>yjbM</i>        |              | GTP diphosphokinase                                                                     | Acid stress                                                                    | <i>Lactiplantibacillus plantarum</i>                                           |
| OG0000777 | <i>pycA</i>        | lp_2136      | Pyruvate carboxylase                                                                    | Adhesion                                                                       | <i>Lactiplantibacillus plantarum</i> (ATCC BAA-793 / NCIMB 8826 / WCFS1)       |
| OG0000907 | <i>argS</i>        | lp_1391      | Arginine--tRNA ligase                                                                   | Bile resistance                                                                | <i>Lactiplantibacillus plantarum</i> (ATCC BAA-793 / NCIMB 8826 / WCFS1)       |
| OG0001010 | <i>grpE</i>        | lp_2028      | Protein GrpE / HSP-70 cofactor                                                          | Acid stress/ Bile resistance/Temperature                                       | <i>Lactiplantibacillus plantarum</i> (ATCC BAA-793 / NCIMB 8826 / WCFS1)       |
| OG0001130 | <i>groS/groES</i>  | lp_0727      | 10 kDa chaperonin                                                                       | Acid stress/ Bile resistance/Temperature                                       | <i>Lactiplantibacillus plantarum</i> (ATCC BAA-793 / NCIMB 8826 / WCFS1)       |
| OG0001131 | <i>groL/groEL</i>  | lp_0728      | 60 kDa chaperonin                                                                       | Acid stress                                                                    | <i>Lactiplantibacillus plantarum</i> (ATCC BAA-793 / NCIMB 8826 / WCFS1)       |
| OG0001163 | <i>uvrA/uvrA_1</i> | lp_0773      | UvrABC system protein A                                                                 | Acid stress                                                                    | <i>Lactiplantibacillus plantarum</i> (ATCC BAA-793 / NCIMB 8826 / WCFS1)       |
| OG0001164 | <i>luxS</i>        | lp_0774      | S-ribosylhomocysteine lyase                                                             | Bile resistance/Acid stress/ Temperature/Production of antimicrobial compounds | <i>Lactiplantibacillus plantarum</i> (ATCC BAA-793 / NCIMB 8826 / WCFS1)       |
| OG0001172 | <i>clpP_2/clpP</i> | CYU10_001617 | ATP-dependent Clp protease proteolytic subunit                                          | Acid stress                                                                    | <i>Lactococcus lactis</i> subsp. <i>lactis</i> ( <i>Streptococcus lactis</i> ) |
| OG0001175 | <i>pgk</i>         | lp_0790      | Phosphoglycerate kinase                                                                 | Acid stress/ Bile resistance                                                   | <i>Lactiplantibacillus plantarum</i> (ATCC BAA-793 / NCIMB 8826 / WCFS1)       |
| OG0001176 | <i>tpiA</i>        | lp_0791      | Triosephosphate isomerase                                                               | Acid stress                                                                    | <i>Lactiplantibacillus plantarum</i> (ATCC BAA-793 / NCIMB 8826 / WCFS1)       |
| OG0001177 | <i>eno</i>         |              | Enolase                                                                                 | Acid stress/ Bile resistance                                                   | <i>Lactiplantibacillus plantarum</i>                                           |
| OG0001192 | <i>exoA</i>        | lp_0812      | Exodeoxyribonuclease III                                                                | Adhesión                                                                       | <i>Lactiplantibacillus plantarum</i> (ATCC BAA-793 / NCIMB 8826 / WCFS1)       |
| OG0001221 | <i>recA</i>        | lp_2301      | Protein RecA                                                                            | Acid stress                                                                    | <i>Lactiplantibacillus plantarum</i> (ATCC BAA-793 / NCIMB 8826 / WCFS1)       |
| OG0001278 | <i>atpB</i>        | lp_2370      | ATP synthase subunit a                                                                  | Acid stress                                                                    | <i>Lactiplantibacillus plantarum</i> (ATCC BAA-793 / NCIMB 8826 / WCFS1)       |
| OG0001279 | <i>atpE</i>        | lp_2369      | ATP synthase subunit c                                                                  | Acid stress                                                                    | <i>Lactiplantibacillus plantarum</i> (ATCC BAA-793 / NCIMB 8826 / WCFS1)       |
| OG0001280 | <i>atpF</i>        | lp_2368      | ATP synthase subunit b                                                                  | Acid stress                                                                    | <i>Lactiplantibacillus plantarum</i> (ATCC BAA-793 / NCIMB 8826 / WCFS1)       |
| OG0001281 | <i>atpH</i>        | lp_2367      | ATP synthase subunit delta                                                              | Acid stress                                                                    | <i>Lactiplantibacillus plantarum</i> (ATCC BAA-793 / NCIMB 8826 / WCFS1)       |
| OG0001282 | <i>atpA</i>        | lp_2366      | ATP synthase subunit alpha                                                              | Acid stress                                                                    | <i>Lactiplantibacillus plantarum</i> (ATCC BAA-793 / NCIMB 8826 / WCFS1)       |
| OG0001283 | <i>atpG</i>        | lp_2365      | ATP synthase gamma chain                                                                | Acid stress                                                                    | <i>Lactiplantibacillus plantarum</i> (ATCC BAA-793 / NCIMB 8826 / WCFS1)       |
| OG0001284 | <i>atpD</i>        | lp_2364      | ATP synthase subunit beta                                                               | Acid stress                                                                    | <i>Lactiplantibacillus plantarum</i> (ATCC BAA-793 / NCIMB 8826 / WCFS1)       |
| OG0001285 | <i>atpC</i>        | lp_2363      | ATP synthase epsilon chain                                                              | Acid stress                                                                    | <i>Lactiplantibacillus plantarum</i> (ATCC BAA-793 / NCIMB 8826 / WCFS1)       |
| OG0001342 | <i>ywaC</i>        |              | GTP diphosphokinase                                                                     | Acid stress                                                                    | <i>Lactiplantibacillus plantarum</i>                                           |
| OG0001512 | <i>nagB/gnp</i>    | lp_0226      | Glucosamine-6-phosphate deaminase                                                       | Bile resistance                                                                | <i>Lactiplantibacillus plantarum</i> (ATCC BAA-793 / NCIMB 8826 / WCFS1)       |
| OG0001582 | <i>pepO</i>        | lp_3445      | Endopeptidase PepO                                                                      | Bile resistance                                                                | <i>Lactiplantibacillus plantarum</i> (ATCC BAA-793 / NCIMB 8826 / WCFS1)       |
| OG0001668 | <i>lspA</i>        | lp_1780      | Lipoprotein signal peptidase                                                            | Adhesion                                                                       | <i>Lactiplantibacillus plantarum</i> (ATCC BAA-793 / NCIMB 8826 / WCFS1)       |
| OG0001683 | <i>ponA/pbp1A</i>  | lp_1751      | DD-transpeptidase / Penicillin-sensitive transpeptidase / Penicillin-binding protein 1A | Bile resistance                                                                | <i>Lactiplantibacillus plantarum</i> (ATCC BAA-793 / NCIMB 8826 / WCFS1)       |
| OG0001741 | <i>gadB</i>        | lp_3420      | Glutamate decarboxylase                                                                 | Acid stress                                                                    | <i>Lactiplantibacillus plantarum</i> (ATCC BAA-793 / NCIMB 8826 / WCFS1)       |

|           |               |         |                                                                           |                              |                                                                                |
|-----------|---------------|---------|---------------------------------------------------------------------------|------------------------------|--------------------------------------------------------------------------------|
| OG0001827 | <i>glnA</i>   | lp_1581 | Glutamine synthetase                                                      | Bile resistance              | <i>Lactiplantibacillus plantarum</i> (ATCC BAA-793 / NCIMB 8826 / WCFS1)       |
| OG0002197 | <i>clpE</i>   | lp_1269 | ATP-dependent Clp protease, ATP-binding subunit ClpE                      | Acid stress                  | <i>Lactiplantibacillus plantarum</i> (ATCC BAA-793 / NCIMB 8826 / WCFS1)       |
| OG0002295 | <i>pgi</i>    | lp_2502 | Glucose-6-phosphate isomerase                                             | Acid stress                  | <i>Lactiplantibacillus plantarum</i> (ATCC BAA-793 / NCIMB 8826 / WCFS1)       |
| OG0002306 | <i>glpF_2</i> |         | Glycerol uptake facilitator                                               | Osmotic stress               | <i>Lactococcus lactis</i> WFLU12                                               |
| OG0002310 | <i>opuCB</i>  |         | Glycine betaine/carnitine/choline transport system permease protein OpuCB | Osmotic stress               | <i>Lactococcus lactis</i> subsp. <i>lactis</i> ( <i>Streptococcus lactis</i> ) |
| OG0002365 | <i>eno2</i>   | lp_1920 | Enolase 2                                                                 | Acid stress/ Bile resistance | <i>Lactiplantibacillus plantarum</i> (ATCC BAA-793 / NCIMB 8826 / WCFS1)       |
| OG0002445 | <i>treA</i>   | lp_0263 | Trehalose-6-phosphate hydrolase                                           | Intestinal persistence       | <i>Lactiplantibacillus plantarum</i> (ATCC BAA-793 / NCIMB 8826 / WCFS1)       |
| OG0002477 | <i>oppA_1</i> |         | Oligopeptide-binding protein OppA                                         | Bile resistance              | <i>Lactococcus lactis</i> subsp. <i>lactis</i> ( <i>Streptococcus lactis</i> ) |
| OG0002477 | <i>oppA_2</i> |         | Oligopeptide-binding protein OppA                                         | Bile resistance              | <i>Lactococcus lactis</i> subsp. <i>lactis</i> ( <i>Streptococcus lactis</i> ) |
| OG0002704 | <i>celB</i>   |         | PTS system, cellobiose-specific EIIC component                            | Intestinal persistence       | <i>Lactiplantibacillus plantarum</i> considerados en este trabajo              |



|                                                                                                                             |                                |                                                    |                    |                    |                                                 |                    |                    |                                              |                    |                  |                                                 |                    |                    |
|-----------------------------------------------------------------------------------------------------------------------------|--------------------------------|----------------------------------------------------|--------------------|--------------------|-------------------------------------------------|--------------------|--------------------|----------------------------------------------|--------------------|------------------|-------------------------------------------------|--------------------|--------------------|
| sipS/T/U/V/W<br>(signal<br>peptidase I)                                                                                     | lp_2863<br>lp_3675<br>lp_2862  | CRL1506_000376<br>CRL1506_002269<br>CRL1506_000376 | 97<br>100<br>100   | 73<br>100<br>100   | CRL681_002309<br>CRL681_002887<br>CRL681_002308 | 100<br>100<br>100  | 97<br>100<br>99    | MPL16_002051<br>MPL16_002085<br>MPL16_002051 | 97<br>100<br>100   | 73<br>93<br>100  | TL2766_002540<br>TL2766_000215<br>TL2766_002539 | 100<br>100<br>100  | 99<br>99<br>99     |
| lspA<br>(lipoprotein<br>signal<br>peptidase)<br>Sortase (sortase<br>for cleavage of<br>C-terminal<br>LPxTG-type<br>anchors) | lp_1780<br><br><br><br>lp_0514 | CRL1506_002725<br><br><br>CRL1506_000074           | 100<br><br><br>100 | 100<br><br><br>100 | CRL681_001297<br><br><br>CRL681_000874          | 100<br><br><br>100 | 100<br><br><br>100 | MPL16_003016<br><br><br>MPL16_001043         | 100<br><br><br>100 | 96<br><br><br>95 | TL2766_000246<br><br><br>TL2766_000333          | 100<br><br><br>100 | 100<br><br><br>100 |
| Holins                                                                                                                      |                                |                                                    |                    |                    |                                                 |                    |                    |                                              |                    |                  |                                                 |                    |                    |
| holins (putative)                                                                                                           | lp_1706                        | CRL1506_002780                                     | 100                | 100                | CRL681_001242                                   | 100                | 100                | MPL16_003073                                 | 100                | 83               | TL2766_003074                                   | 100                | 100                |
| FPE pathway components                                                                                                      |                                |                                                    |                    |                    |                                                 |                    |                    |                                              |                    |                  |                                                 |                    |                    |
| ComGA                                                                                                                       | lp_2249                        | CRL1506_001677                                     | 100                | 100                | CRL681_000036                                   | 100                | 100                | MPL16_002707                                 | 100                | 89               | TL2766_002478                                   | 100                | 100                |
| ComGB                                                                                                                       | lp_2248                        | CRL1506_001676                                     | 99                 | 100                | CRL681_000035                                   | 99                 | 99                 | MPL16_002706                                 | 99                 | 84               | TL2766_002477                                   | 99                 | 100                |
| ComGC                                                                                                                       | lp_2247                        | CRL1506_001675                                     | 100                | 100                | CRL681_000034                                   | 100                | 100                | MPL16_002705                                 | 100                | 73               | TL2766_002476                                   | 100                | 100                |
| ComGD                                                                                                                       | N/A                            |                                                    |                    |                    |                                                 |                    |                    |                                              |                    |                  |                                                 |                    |                    |
| ComGF                                                                                                                       | N/A                            |                                                    |                    |                    |                                                 |                    |                    |                                              |                    |                  |                                                 |                    |                    |
| ComEA                                                                                                                       | lp_2131                        | CRL1506_001386                                     | 100                | 99                 | CRL681_000971                                   | 100                | 99                 | MPL16_000009                                 | 99                 | 70               | TL2766_001152                                   | 100                | 98                 |
| ComEB                                                                                                                       | lp_2130                        | CRL1506_001387                                     | 100                | 100                | CRL681_000972                                   | 99                 | 99                 | MPL16_000010                                 | 100                | 98               | TL2766_001151                                   | 100                | 100                |
| ComEC                                                                                                                       | lp_2129                        | CRL1506_001388                                     | 100                | 99                 | CRL681_000973                                   | 100                | 99                 | MPL16_000306                                 | 7                  | 33               | TL2766_001150                                   | 100                | 99                 |
| ComFC                                                                                                                       | lp_0736                        | CRL1506_001908                                     | 100                | 100                | CRL681_001520                                   | 100                | 100                | MPL16_003221                                 | 62                 | 76               | TL2766_001454                                   | 100                | 99                 |
| ComFA                                                                                                                       | lp_0735                        | CRL1506_001907                                     | 100                | 99                 | CRL681_001519                                   | 100                | 99                 | MPL16_000756                                 | 71                 | 25               | TL2766_001455                                   | 100                | 99                 |
| ComC                                                                                                                        | lp_1023                        | CRL1506_001140                                     | 100                | 99                 | CRL681_001769                                   | 100                | 98                 | MPL16_001926                                 | 100                | 90               | TL2766_000624                                   | 100                | 99                 |
